# Supplementary material
Source: PubMed Central journal article supplement (PMC2890449)
Supplement: 1005862107_sapp.pdf [file 1005862107_sapp.pdf]

R. E. RICKLEFS, LIFE HISTORY CONNECTIONS TO RATES OF AGING IN TERRESTRIAL VERTEBRATES

SUPPLEMENTARY INFORMATION

APPENDIX 1. Regression of log-transformed rate of aging as a function of body mass, incubation period, age at maturity, and presence or absence of flight across 124 families of vertebrates.

Table 1. The means of the log<sub>10</sub>-transformed variables across 124 families.

| Variable              | N   | Mean   | Standard deviation | Minimum | Maximum |
|-----------------------|-----|--------|--------------------|---------|---------|
| Adult mass            | 118 | 3.184  | 1.290              | 0.600   | 6.592   |
| Omega                 | 124 | -0.989 | 0.237              | -1.519  | -0.247  |
| m <sub>0</sub>        | 124 | -1.190 | 0.354              | -2.199  | -0.400  |
| Egg mass              | 89  | 1.834  | 1.301              | -1.750  | 5.025   |
| Incubation period     | 104 | 1.779  | 0.472              | 0.300   | 2.817   |
| Postnatal growth rate | 65  | -1.682 | 0.703              | -3.523  | -0.451  |
| Age at maturity       | 90  | 2.795  | 0.387              | 1.781   | 3.675   |

Regression results using log<sub>10</sub>-transformed data for all four vertebrate classes with omega as a function of body mass, length of the gestation/incubation period, age at female sexual maturity, presence or absence of flight.

Overall model:  $F_{4,82} = 34.9$ ,  $P < 0.0001$ ,  $R^2 = 0.630$ ; equation:  $\log_{10}\omega =$

$-0.0365 \log_{10}\text{body mass} (\pm 0.0174 \text{ SE})$ ,  $F_{1,82} = 4.41$ ,  $P = 0.039$  (stand. coeff. = -0.208)

$-0.1416 \log_{10}\text{incubation period} (\pm 0.0487 \text{ SE})$ ,  $F_{1,82} = 8.47$ ,  $P = 0.0047$  (stand. coeff. = -0.289)

$-0.3141 \log_{10}\text{age at maturity} (\pm 0.0455 \text{ SE})$ ,  $F_{1,82} = 47.6$ ,  $P < 0.0001$  (stand. coeff. = -0.524)

$-0.1951 \log_{10}\text{flight} (0 \text{ or } 1) (\pm 0.0392 \text{ SE})$ ,  $F_{1,82} = 24.8$ ,  $P < 0.0001$  (stand. coeff. = -0.388)

Note: the standardized regression coefficients (stand. coeff.) are normalized by the standard deviations of the dependent and independent variables.

After eliminating egg mass and postnatal growth rate ( $K$ ) as non-significant independent variables, the lowest AICc value was for a model including adult mass,  $m_0$ , incubation/gestation period, age at maturity, and presence/absence of flight. The weight ( $w_i$ ) for this model was 0.455; variable weights were adult mass = 0.681 (weighted regression coefficient = -0.036),  $m_0 = 0.373$  (0.063), incubation/gestation period = 0.972 (-0.159), age a maturity = 1.00 (-0.315), and presence/absence of flight = 1.00 (-0.188).

APPENDIX 2. Regression of log-transformed rate of aging as a function of body mass, incubation period, age at maturity, and presence or absence of flight across 51 families of mammals.

Table 1. The means of the log<sub>10</sub>-transformed variables across 51 families.

| Variable          | N  | Mean   | Standard  |         |         |
|-------------------|----|--------|-----------|---------|---------|
|                   |    |        | deviation | Minimum | Maximum |
| Omega             | 51 | -0.973 | 0.253     | -1.519  | -0.247  |
| m <sub>0</sub>    | 51 | -1.156 | 0.379     | -2.199  | -0.544  |
| Incubation period | 51 | 2.056  | 0.364     | 1.079   | 2.817   |
| Age at maturity   | 51 | 2.738  | 0.389     | 1.781   | 3.560   |

Regression results using log<sub>10</sub>-transformed data for mammals only with omega as a function of body mass, length of the gestation/incubation period, age at female sexual maturity, presence or absence of flight.

Overall model:  $F_{3,47} = 47.8$ ,  $P < 0.0001$ ,  $R^2 = 0.753$ ; equation:  $\log_{10}\omega = 0.490 (\pm 0.135 \text{ SE})$

+0.1437  $\log_{10}m_0$  ( $\pm 0.0604 \text{ SE}$ ),  $F_{1,47} = 5.66$ ,  $P = 0.022$  (stand. coeff. = 0.215)

-0.1509  $\log_{10}$ gestation period ( $\pm 0.0713 \text{ SE}$ ),  $F_{1,47} = 4.48$ ,  $P < 0.040$  (stand. coeff. = -0.217)

-0.3604  $\log_{10}$ age at maturity ( $\pm 0.0729 \text{ SE}$ ),  $F_{1,47} = 24.4$ ,  $P < 0.0001$  (stand. coeff. = -0.553)

Note: the standardized regression coefficients (stand. coeff.) are normalized by the standard deviations of the dependent and independent variables.

After eliminating egg mass, postnatal growth rate ( $K$ ), and presence/absence of flight as non-significant independent variables, the lowest AICc value was for a model including adult mass,  $m_0$ , incubation/gestation period, weaning period, and age at maturity. The weight ( $w_i$ ) for this model was 0.227; variable weights were adult mass = 0.235 (weighted regression coefficient = 0.0083),  $m_0 = 0.793$  (0.124), incubation/gestation period = 0.791 (-0.160), age at weaning = 0.521 (-0.120), and age a maturity = 0.995 (-0.353).

### APPENDIX 3. Estimation of $B/M$ for birds and mammals.

When more independent offspring are produced in a population than the number of adults that die each year, then the age at maturity must be delayed until the survival of adult recruits equals the annual adult mortality. Equation (3) derived for such a balanced population is  $a = -\log(B/M)/\log(S)$ , where  $a$  is the age at maturity,  $B$  is the annual fecundity,  $M$  is the annual adult mortality ( $1 - S$ ), and  $S$  is the annual adult survival.

For the data provided by Saether and Bakke (1) for a sample of 49 species of birds, annual fecundity (number of female offspring produced to fledging [not independence] per female) is related to annual mortality by regression (SAS GLM procedure) through the origin by  $B = 3.34 (\pm 0.25 \text{ SE}) M$ . The ratio logarithm of the ratio  $B/M$  can be estimated from the slope of the regression through the origin of age at maturity ( $a$ ) as a function of  $-1/\log(S)$ . In this case, the slope is  $0.519 (\pm 0.028 \text{ SE})$ , which corresponds to  $B/M = 1.68$ . The ratio  $B/M$  also can be estimated by nonlinear regression (SAS NLIN procedure) from the relationship between  $a$  and the logarithm of  $S$ , giving  $B/M = 1.68 (\pm 0.05 \text{ SE}, 95\% \text{ CI} = 1.59-1.78)$  ( $F_{1,48} = 341, P < 0.0001$ ). The estimate of  $B/M$  from the age at first reproduction and  $S$  is about half the estimate from the regression of  $B$  (fledged offspring) on  $M$ , which implies that first-year survival of fledged young averages about one-half the annual adult survival.

For the data provided by Ricklefs (2) for a sample of 34 species of birds (only 14 of which were common to the data of Saether and Bakke), annual fecundity (total number of offspring produced to fledging [not independence] per breeding pair) is related to annual mortality by  $B = 5.68 (\pm 0.37 \text{ SE})$ , or 2.84 female offspring per female. The slope of  $a$  versus  $-1/\log(S)$  is  $0.477 (\pm 0.024 \text{ SE})$ , implying  $B/M = 1.61$ . The ratio  $B/M$  estimated by nonlinear regression was  $B/M = 1.61 (\pm 0.04 \text{ SE}, 95\% \text{ CI} = 1.53-1.69)$  ( $F_{1,33} = 385, P < 0.0001$ ). Because the estimate of  $B/M$  from the age at first reproduction and  $S$  (1.61) is 57% of the estimate from the regression of  $B$  on  $M$  (2.84), first-year survival of fledged young averages about 57% of the annual adult survival.

For the data summarized by Millar and Zammuto (3) for 26 species of mammals with  $M < 0.80$ , annual fecundity (litter size) is related to annual mortality by  $B = 11.34 (\pm 0.80 \text{ SE})$ , or 5.67 female offspring per female. The slope of  $a$  versus  $-1/\log(S)$  was  $0.674 (\pm 0.028 \text{ SE})$ , implying  $B/M = 1.96$ . The ratio  $B/M$  estimated by nonlinear regression was  $1.96 (\pm 0.05 \text{ SE}, 95\% \text{ CI} = 1.86-2.07)$  ( $F_{1,28} = 650, P < 0.0001$ ). Because the estimate of  $B/M$  from the age at first reproduction and  $S$  (1.96) was 35% of the estimate from the regression of  $B$  on  $M$ , first-year survival of newborn young averages 35% of the annual adult survival.

APPENDIX 4. Parameters of Weibull functions ( $m_x = m_0 + ax^b$ , where  $\omega = a^{1/(b+1)}$ ) fitted to the proportion of individuals surviving as a function of age. Status refers to data from zoo or wild populations. All the zoo data were provided by the International Species Information System (ISIS; [www.isis.org/](http://www.isis.org/)). Weibull parameters for wild populations were obtained from Ricklefs (4) or from Weibull functions fitted to data in Lunch and Fagan (5, Note a) or Loison et al. (6, Note b). References are at the end of the Supplemental Information.  $n$  is the number of reported ages at death; oldest is the age (years) of the maximum reported age at death in the sample.

## Mammals

| Order        | Family         | Genus               | Species              | Status | $b$  | $a$      | $m_0$ | $\omega$ | $n$ | oldest | Notes |
|--------------|----------------|---------------------|----------------------|--------|------|----------|-------|----------|-----|--------|-------|
| Artiodactyla | Antilocapridae | <i>Antilocapra</i>  | <i>americana</i>     | zoo    | 2.02 | 3.19E-03 | 0.234 | 0.149    | 364 | 15.15  |       |
| Artiodactyla | Bovidae        | <i>Addax</i>        | <i>nasomaculatus</i> | zoo    | 3.27 | 1.90E-05 | 0.038 | 0.078    | 142 | 27.68  |       |
| Artiodactyla | Bovidae        | <i>Aepyceros</i>    | <i>melampus</i>      | wild   | 1.10 | 4.84E-02 | 0.007 | 0.237    | .   | .      | a     |
| Artiodactyla | Bovidae        | <i>Aepyceros</i>    | <i>melampus</i>      | zoo    | 4.28 | 2.54E-06 | 0.111 | 0.087    | 208 | 20.33  |       |
| Artiodactyla | Bovidae        | <i>Ammotragus</i>   | <i>lervia</i>        | zoo    | 2.13 | 7.01E-04 | 0.085 | 0.098    | 182 | 27.95  |       |
| Artiodactyla | Bovidae        | <i>Antilope</i>     | <i>cervicapra</i>    | zoo    | 3.09 | 1.28E-04 | 0.129 | 0.112    | 567 | 22.97  |       |
| Artiodactyla | Bovidae        | <i>Bison</i>        | <i>bison</i>         | zoo    | 3.00 | 1.84E-05 | 0.028 | 0.065    | 166 | 33.29  |       |
| Artiodactyla | Bovidae        | <i>Bos</i>          | <i>frontalis</i>     | zoo    | 2.01 | 5.68E-04 | 0.141 | 0.083    | 32  | 24.76  |       |
| Artiodactyla | Bovidae        | <i>Bos</i>          | <i>grunniens</i>     | zoo    | 2.92 | 4.04E-05 | 0.061 | 0.076    | 103 | 26.26  |       |
| Artiodactyla | Bovidae        | <i>Bos</i>          | <i>javanicus</i>     | zoo    | 3.94 | 2.07E-06 | 0.064 | 0.071    | 92  | 23.83  |       |
| Artiodactyla | Bovidae        | <i>Bos</i>          | <i>taurus</i>        | zoo    | 3.88 | 4.71E-06 | 0.061 | 0.081    | 48  | 21.91  |       |
| Artiodactyla | Bovidae        | <i>Bubalus</i>      | <i>bubalis</i>       | zoo    | 4.49 | 4.34E-07 | 0.042 | 0.069    | 42  | 42.58  |       |
| Artiodactyla | Bovidae        | <i>Capra</i>        | <i>falconeri</i>     | zoo    | 2.77 | 1.00E-04 | 0.105 | 0.087    | 79  | 24.56  |       |
| Artiodactyla | Bovidae        | <i>Capra</i>        | <i>hircus</i>        | zoo    | 1.90 | 1.12E-03 | 0.146 | 0.096    | 109 | 20.16  |       |
| Artiodactyla | Bovidae        | <i>Capra</i>        | <i>ibex ibex</i>     | zoo    | 3.03 | 6.42E-05 | 0.103 | 0.091    | 113 | 21.56  |       |
| Artiodactyla | Bovidae        | <i>Connochaetes</i> | <i>taurinus</i>      | zoo    | 3.55 | 1.78E-05 | 0.058 | 0.091    | 37  | 23.80  |       |
| Artiodactyla | Bovidae        | <i>Damaliscus</i>   | <i>lunata</i>        | wild   | .    | .        | 0.166 | 0.311    | .   | .      |       |
| Artiodactyla | Bovidae        | <i>Damaliscus</i>   | <i>lunata</i>        | wild   | .    | .        | 0.182 | 0.326    | .   | .      |       |
| Artiodactyla | Bovidae        | <i>Damaliscus</i>   | <i>lunata</i>        | wild   | 2.54 | 1.88E-02 | 0.094 | 0.325    | .   | .      | a     |
| Artiodactyla | Bovidae        | <i>Damaliscus</i>   | <i>pygargus</i>      | zoo    | 3.95 | 1.33E-05 | 0.063 | 0.104    | 71  | 17.12  |       |
| Artiodactyla | Bovidae        | <i>Damaliscus</i>   | <i>pygargus</i>      | zoo    | 2.57 | 4.65E-04 | 0.086 | 0.116    | 205 | 18.64  |       |
| Artiodactyla | Bovidae        | <i>Gazella</i>      | <i>gazella</i>       | zoo    | 3.03 | 2.77E-04 | 0.095 | 0.131    | 69  | 14.57  |       |
| Artiodactyla | Bovidae        | <i>Gazella</i>      | <i>granti</i>        | zoo    | 3.16 | 5.00E-05 | 0.155 | 0.092    | 169 | 19.75  |       |
| Artiodactyla | Bovidae        | <i>Gazella</i>      | <i>subgutturosa</i>  | zoo    | 1.05 | 9.36E-02 | 0.057 | 0.315    | 206 | 14.57  |       |
| Artiodactyla | Bovidae        | <i>Gazella</i>      | <i>thomsonii</i>     | zoo    | 2.93 | 8.30E-05 | 0.132 | 0.092    | 278 | 21.45  |       |
| Artiodactyla | Bovidae        | <i>Hemitragus</i>   | <i>jemlahicus</i>    | zoo    | 2.29 | 3.83E-04 | 0.116 | 0.092    | 397 | 27.30  |       |
| Artiodactyla | Bovidae        | <i>Hemitragus</i>   | <i>jemlahicus</i>    | wild   | 1.60 | 9.19E-03 | 0.058 | 0.165    | .   | .      | a     |

|              |           |                    |                       |      |      |          |        |        |     |         |   |
|--------------|-----------|--------------------|-----------------------|------|------|----------|--------|--------|-----|---------|---|
| Artiodactyla | Bovidae   | <i>Hippotragus</i> | <i>equinus</i>        | zoo  | 3.71 | 1.69E-05 | 0.097  | 0.097  | 139 | 17.95   |   |
| Artiodactyla | Bovidae   | <i>Hippotragus</i> | <i>niger</i>          | zoo  | 2.80 | 8.13E-05 | 0.070  | 0.084  | 200 | 23.66   |   |
| Artiodactyla | Bovidae   | <i>Kobus</i>       | <i>ellipsiprymnus</i> | zoo  | 4.59 | 1.05E-06 | 0.049  | 0.085  | 25  | 23.33   |   |
| Artiodactyla | Bovidae   | <i>Kobus</i>       | <i>kob</i>            | wild | .    | .        | 0.206  | 0.242  | .   | .       |   |
| Artiodactyla | Bovidae   | <i>Kobus</i>       | <i>leche</i>          | zoo  | 3.25 | 4.05E-05 | 0.053  | 0.093  | 38  | 23.72   |   |
| Artiodactyla | Bovidae   | <i>Kobus</i>       | <i>megaceros</i>      | zoo  | 3.12 | 9.07E-05 | 0.056  | 0.104  | 80  | 18.88   |   |
| Artiodactyla | Bovidae   | <i>Oreamnos</i>    | <i>americanus</i>     | zoo  | 2.23 | 9.95E-04 | 0.071  | 0.118  | 104 | 15.98   |   |
| Artiodactyla | Bovidae   | <i>Oryx</i>        | <i>dammah</i>         | zoo  | 2.29 | 1.60E-03 | 0.124  | 0.141  | 58  | 19.2548 |   |
| Artiodactyla | Bovidae   | <i>Oryx</i>        | <i>leucoryx</i>       | zoo  | 3.84 | 6.04E-06 | 0.047  | 0.084  | 57  | 20.6274 |   |
| Artiodactyla | Bovidae   | <i>Ovis</i>        | <i>aries</i>          | zoo  | 3.71 | 1.02E-05 | 0.099  | 0.087  | 54  | 18.06   |   |
| Artiodactyla | Bovidae   | <i>Ovis</i>        | <i>canadensis</i>     | wild | 3.16 | 9.60E-05 | 0.0527 | 0.108  | .   | .       | b |
| Artiodactyla | Bovidae   | <i>Ovis</i>        | <i>canadensis</i>     | wild | 6.35 | 1.00E-08 | 0.0827 | 0.0815 | .   | .       | b |
| Artiodactyla | Bovidae   | <i>Ovis</i>        | <i>dalli</i>          | wild | .    | .        | 0.107  | 0.118  | .   | .       |   |
| Artiodactyla | Bovidae   | <i>Ovis</i>        | <i>dalli</i>          | wild | .    | .        | 0.049  | 0.170  | .   | .       |   |
| Artiodactyla | Bovidae   | <i>Ovis</i>        | <i>dalli</i>          | wild | 4.39 | 3.20E-05 | 0.000  | 0.147  | .   | .       | a |
| Artiodactyla | Bovidae   | <i>Ovis</i>        | <i>dalli</i>          | wild | 5.71 | 1.02E-06 | 0.046  | 0.128  | .   | .       | a |
| Artiodactyla | Bovidae   | <i>Ovis</i>        | <i>dalli</i>          | wild | 1.56 | 7.14E-03 | 0.038  | 0.145  | .   | .       | a |
| Artiodactyla | Bovidae   | <i>Rupicapra</i>   | <i>rupicapra</i>      | zoo  | 0.62 | 2.39E-02 | 0.109  | 0.100  | 26  | 15.75   |   |
| Artiodactyla | Bovidae   | <i>Rupicapra</i>   | <i>rupicapra</i>      | wild | .    | .        | 0.219  | 0.211  | .   | .       |   |
| Artiodactyla | Bovidae   | <i>Rupicapra</i>   | <i>pyrenaica</i>      | wild | 2.39 | 3.50E-04 | 0.0574 | 0.0957 | .   | .       | b |
| Artiodactyla | Bovidae   | <i>Rupicapra</i>   | <i>pyrenaica</i>      | wild | 6.22 | 1.00E-08 | 0.0787 | 0.0779 | .   | .       | b |
| Artiodactyla | Bovidae   | <i>Rupicapra</i>   | <i>rupicapra</i>      | wild | 1.87 | 2.37E-02 | 0.000  | 0.271  | .   | .       | a |
| Artiodactyla | Bovidae   | <i>Syncerus</i>    | <i>caffer</i>         | wild | 1.14 | 2.26E-02 | 0.000  | 0.170  | .   | .       | a |
| Artiodactyla | Bovidae   | <i>Syncerus</i>    | <i>caffer</i>         | zoo  | 4.26 | 4.72E-07 | 0.020  | 0.063  | 39  | 27.30   |   |
| Artiodactyla | Bovidae   | <i>Syncerus</i>    | <i>caffer</i>         | wild | .    | .        | 0.092  | 0.084  | .   | .       |   |
| Artiodactyla | Bovidae   | <i>Syncerus</i>    | <i>caffer</i>         | wild | .    | .        | 0.026  | 0.096  | .   | .       |   |
| Artiodactyla | Bovidae   | <i>Syncerus</i>    | <i>caffer</i>         | wild | .    | .        | 0.026  | 0.119  | .   | .       |   |
| Artiodactyla | Bovidae   | <i>Syncerus</i>    | <i>caffer</i>         | wild | .    | .        | 0.030  | 0.143  | .   | .       |   |
| Artiodactyla | Camelidae | <i>Camelus</i>     | <i>bactrianus</i>     | zoo  | 2.03 | 2.77E-04 | 0.012  | 0.067  | 71  | 35.99   |   |
| Artiodactyla | Camelidae | <i>Camelus</i>     | <i>dromedarius</i>    | zoo  | 3.36 | 7.11E-06 | 0.036  | 0.066  | 149 | 33.59   |   |
| Artiodactyla | Camelidae | <i>Lama</i>        | <i>glama</i>          | zoo  | 2.32 | 1.90E-04 | 0.041  | 0.076  | 54  | 28.04   |   |
| Artiodactyla | Camelidae | <i>Lama</i>        | <i>guanicoe</i>       | zoo  | 2.15 | 3.54E-04 | 0.021  | 0.081  | 37  | 32.58   |   |
| Artiodactyla | Cervidae  | <i>Alces</i>       | <i>alces</i>          | zoo  | 1.45 | 5.70E-03 | 0.091  | 0.121  | 125 | 15.77   |   |
| Artiodactyla | Cervidae  | <i>Axis</i>        | <i>axis</i>           | zoo  | 3.13 | 3.75E-05 | 0.125  | 0.085  | 224 | 73.90   |   |
| Artiodactyla | Cervidae  | <i>Capreolus</i>   | <i>capreolus</i>      | zoo  | 2.92 | 9.05E-04 | 0.044  | 0.167  | 25  | 12.23   |   |
| Artiodactyla | Cervidae  | <i>Capreolus</i>   | <i>capreolus</i>      | wild | 6.98 | 1.00E-08 | 0.1656 | 0.0994 | .   | .       | b |
| Artiodactyla | Cervidae  | <i>Capreolus</i>   | <i>capreolus</i>      | wild | 1.96 | 7.50E-04 | 0.0408 | 0.088  | .   | .       | b |
| Artiodactyla | Cervidae  | <i>Cervus</i>      | <i>elaphus</i>        | wild | .    | .        | 0.050  | 0.112  | .   | .       |   |
| Artiodactyla | Cervidae  | <i>Cervus</i>      | <i>elaphus</i>        | wild | .    | .        | 0.025  | 0.115  | .   | .       |   |
| Artiodactyla | Cervidae  | <i>Cervus</i>      | <i>elaphus</i>        | zoo  | 3.92 | 3.28E-06 | 0.054  | 0.077  | 144 | 22.55   |   |

|              |                |                     |                       |      |      |          |       |       |     |       |   |
|--------------|----------------|---------------------|-----------------------|------|------|----------|-------|-------|-----|-------|---|
| Artiodactyla | Cervidae       | <i>Damaliscus</i>   | <i>dama</i>           | zoo  | 1.11 | 1.36E-02 | 0.028 | 0.131 | 157 | 32.29 |   |
| Artiodactyla | Cervidae       | <i>Odocoileus</i>   | <i>virginianus</i>    | zoo  | 4.38 | 4.74E-06 | 0.116 | 0.103 | 34  | 20.07 |   |
| Artiodactyla | Cervidae       | <i>Rangifer</i>     | <i>tarandrus</i>      | wild | 1.60 | 7.31E-03 | 0.051 | 0.151 | .   | .     | a |
| Artiodactyla | Cervidae       | <i>Rangifer</i>     | <i>tarandus</i>       | wild | .    | .        | 0.076 | 0.111 | .   | .     |   |
| Artiodactyla | Cervidae       | <i>Rangifer</i>     | <i>tarandus</i>       | wild | .    | .        | 0.076 | 0.212 | .   | .     |   |
| Artiodactyla | Cervidae       | <i>Rangifer</i>     | <i>tarandus</i>       | zoo  | 3.44 | 2.69E-04 | 0.131 | 0.157 | 87  | 18.48 |   |
| Artiodactyla | Cervidae       | <i>Rangifer</i>     | <i>tarandus</i>       | zoo  | 3.17 | 6.35E-05 | 0.095 | 0.099 | 313 | 22.70 |   |
| Artiodactyla | Giraffidae     | <i>Giraffa</i>      | <i>camelopardalis</i> | zoo  | 2.64 | 3.59E-05 | 0.027 | 0.060 | 93  | 39.93 |   |
| Artiodactyla | Giraffidae     | <i>Giraffa</i>      | <i>camelopardalis</i> | zoo  | 1.88 | 4.19E-04 | 0.022 | 0.067 | 51  | 31.82 |   |
| Artiodactyla | Giraffidae     | <i>Giraffa</i>      | <i>camelopardalis</i> | zoo  | 3.85 | 9.39E-07 | 0.053 | 0.057 | 59  | 29.90 |   |
| Artiodactyla | Hippopotamidae | <i>Hippopotamus</i> | <i>amphibius</i>      | zoo  | 3.30 | 3.41E-07 | 0.002 | 0.031 | 27  | 61.21 |   |
| Artiodactyla | Hippopotamidae | <i>Hippopotamus</i> | <i>amphibius</i>      | wild | .    | .        | 0.030 | 0.048 | .   | .     |   |
| Artiodactyla | Hippopotamidae | <i>Hippopotamus</i> | <i>amphibius</i>      | wild | 4.70 | 1.00E-08 | 0.005 | 0.040 | .   | .     | a |
| Artiodactyla | Suidae         | <i>Sus</i>          | <i>scrofa</i>         | zoo  | 2.49 | 4.81E-04 | 0.044 | 0.112 | 35  | 19.46 |   |
| Carnivora    | Ailuropodidae  | <i>Ailurus</i>      | <i>fulgens</i>        | zoo  | 3.11 | 5.35E-05 | 0.096 | 0.091 | 209 | 17.35 |   |
| Carnivora    | Canidae        | <i>Canis</i>        | <i>lupus</i>          | zoo  | 2.67 | 1.34E-04 | 0.025 | 0.088 | 91  | 16.00 |   |
| Carnivora    | Canidae        | <i>Canis</i>        | <i>lupus</i>          | zoo  | 4.82 | 1.58E-06 | 0.008 | 0.101 | 38  | 11.00 |   |
| Carnivora    | Canidae        | <i>Canis</i>        | <i>lupus</i>          | zoo  | 4.93 | 1.41E-05 | 0.042 | 0.152 | 23  | 10.00 |   |
| Carnivora    | Canidae        | <i>Canis</i>        | <i>lupus</i>          | zoo  | 1.98 | 5.08E-03 | 0.000 | 0.170 | 89  | 14.00 |   |
| Carnivora    | Canidae        | <i>Canis</i>        | <i>lupus</i>          | zoo  | 3.01 | 1.03E-04 | 0.052 | 0.101 | 414 | 27.81 |   |
| Carnivora    | Canidae        | <i>Chrysocyon</i>   | <i>brachyurus</i>     | zoo  | 5.42 | 2.96E-07 | 0.049 | 0.096 | 146 | 20.00 |   |
| Carnivora    | Canidae        | <i>Lycaon</i>       | <i>pictus</i>         | zoo  | 5.91 | 4.24E-07 | 0.070 | 0.119 | 210 | 13.65 |   |
| Carnivora    | Canidae        | <i>Vulpes</i>       | <i>vulpes</i>         | zoo  | 3.18 | 7.22E-05 | 0.089 | 0.102 | 50  | 16.47 |   |
| Carnivora    | Felidae        | <i>Acinonyx</i>     | <i>jubatus</i>        | zoo  | 3.42 | 3.82E-05 | 0.046 | 0.100 | 575 | 27.32 |   |
| Carnivora    | Felidae        | <i>Felis</i>        | <i>silvestris</i>     | zoo  | 2.74 | 2.53E-04 | 0.062 | 0.109 | 83  | .     |   |
| Carnivora    | Felidae        | <i>Lynx</i>         | <i>lynx</i>           | zoo  | 5.32 | 4.47E-07 | 0.086 | 0.099 | 24  | 21.51 |   |
| Carnivora    | Felidae        | <i>Panthera</i>     | <i>leo</i>            | zoo  | 2.49 | 1.69E-04 | 0.010 | 0.083 | 350 | 51.52 |   |
| Carnivora    | Felidae        | <i>Panthera</i>     | <i>leo</i>            | wild | .    | .        | 0.032 | 0.126 | .   | .     |   |
| Carnivora    | Felidae        | <i>Panthera</i>     | <i>onca</i>           | zoo  | 3.21 | 1.22E-05 | 0.018 | 0.068 | 225 | 35.09 |   |
| Carnivora    | Felidae        | <i>Panthera</i>     | <i>pardus</i>         | zoo  | 2.32 | 2.06E-04 | 0.012 | 0.078 | 486 | 36.72 |   |
| Carnivora    | Felidae        | <i>Panthera</i>     | <i>tigris</i>         | zoo  | 2.95 | 3.70E-05 | 0.019 | 0.076 | 199 | 46.83 |   |
| Carnivora    | Felidae        | <i>Panthera</i>     | <i>tigris altaica</i> | zoo  | 6.18 | 9.04E-09 | 0.053 | 0.076 | 501 | 22.19 |   |
| Carnivora    | Felidae        | <i>Uncia</i>        | <i>uncia</i>          | zoo  | 3.78 | 7.52E-06 | 0.042 | 0.085 | 157 | 35.96 |   |
| Carnivora    | Herpestidae    | <i>Suricata</i>     | <i>suricatta</i>      | zoo  | 2.81 | 3.72E-04 | 0.104 | 0.126 | 137 | 20.63 |   |
| Carnivora    | Hyaenidae      | <i>Crocuta</i>      | <i>crocuta</i>        | zoo  | 2.94 | 8.60E-06 | 0.039 | 0.052 | 52  | 42.16 |   |
| Carnivora    | Mustelidae     | <i>Lutra</i>        | <i>lutra</i>          | zoo  | 5.91 | 5.13E-07 | 0.172 | 0.123 | 47  | 11.40 |   |
| Carnivora    | Mustelidae     | <i>Martes</i>       | <i>zibellina</i>      | wild | .    | .        | 0.280 | 0.153 | .   | .     |   |
| Carnivora    | Mustelidae     | <i>Mephitis</i>     | <i>mephitis</i>       | zoo  | 3.15 | 8.89E-04 | 0.114 | 0.184 | 188 | 36.27 |   |
| Carnivora    | Mustelidae     | <i>Mustela</i>      | <i>putorius</i>       | zoo  | 2.84 | 2.03E-03 | 0.117 | 0.199 | 158 | 17.96 |   |
| Carnivora    | Mustelidae     | <i>Mustela</i>      | <i>putorius</i>       | zoo  | 2.57 | 3.24E-03 | 0.100 | 0.201 | 83  | 17.96 |   |

|                 |                  |                      |                      |      |      |          |        |       |      |         |   |
|-----------------|------------------|----------------------|----------------------|------|------|----------|--------|-------|------|---------|---|
| Carnivora       | Mustelidae       | <i>Myodes</i>        | <i>glareolus</i>     | wild | 5.40 | 1.07E-07 | *.2827 | 0.979 | .    | .       | a |
| Carnivora       | Otaridae         | <i>Callorhinus</i>   | <i>ursinus</i>       | wild | .    | .        | 0.051  | 0.096 | .    | .       |   |
| Carnivora       | Otaridae         | <i>Callorhinus</i>   | <i>ursinus</i>       | wild | 4.55 | 7.52E-07 | 0.037  | 0.079 | .    | .       | a |
| Carnivora       | Phocidae         | <i>Phoca</i>         | <i>hispidia</i>      | wild | .    | .        | 0.032  | 0.056 | .    | .       |   |
| Carnivora       | Phocidae         | <i>Phoca</i>         | <i>hispidia</i>      | wild | .    | .        | 0.063  | 0.057 | .    | .       |   |
| Carnivora       | Phocidae         | <i>Phoca</i>         | <i>vitulina</i>      | zoo  | 3.84 | 6.39E-06 | 0.033  | 0.084 | 15   | 47.62   |   |
| Carnivora       | Phocidae         | <i>Phoca</i>         | <i>vitulina</i>      | zoo  | 2.43 | 1.12E-04 | 0.018  | 0.070 | 59   | 47.62   |   |
| Carnivora       | Procyonidae      | <i>Nasua</i>         | <i>nasua</i>         | zoo  | 1.95 | 1.39E-03 | 0.035  | 0.107 | 79   | 20.67   |   |
| Carnivora       | Procyonidae      | <i>Potos</i>         | <i>flavus</i>        | zoo  | 1.07 | 9.17E-03 | 0.029  | 0.103 | 66   | 35.29   |   |
| Carnivora       | Procyonidae      | <i>Procyon</i>       | <i>lotor</i>         | zoo  | 1.90 | 1.33E-03 | 0.066  | 0.102 | 87   | 36.34   |   |
| Carnivora       | Ursidae          | <i>Ursus</i>         | <i>americanus</i>    | zoo  | 3.61 | 2.10E-06 | 0.010  | 0.059 | 63   | 38.87   |   |
| Carnivora       | Ursidae          | <i>Ursus</i>         | <i>americanus</i>    | wild | 5.68 | 2.06E-08 | 0.171  | 0.071 | .    | .       | a |
| Carnivora       | Ursidae          | <i>Ursus</i>         | <i>arctos</i>        | zoo  | 3.27 | 2.67E-06 | 0.026  | 0.050 | 39   | 35.38   |   |
| Carnivora       | Ursidae          | <i>Ursus</i>         | <i>arctos</i>        | zoo  | 3.60 | 4.56E-07 | 0.006  | 0.042 | 38   | 50.73   |   |
| Carnivora       | Ursidae          | <i>Ursus</i>         | <i>horribilis</i>    | wild | 3.25 | 1.20E-05 | 0.060  | 0.069 | .    | .       | a |
| Cetacea         | Delphinidae      | <i>Tursiops</i>      | <i>truncatus</i>     | wild | 2.52 | 4.80E-05 | 0.013  | 0.059 | .    | .       | a |
| Chiroptera      | Desmodontidae    | <i>Desmodus</i>      | <i>rotundus</i>      | zoo  | 3.34 | 9.82E-06 | 0.057  | 0.070 | 28   | 30.25   |   |
| Chiroptera      | Desmodontidae    | <i>Desmodus</i>      | <i>rotundus</i>      | wild | 5.98 | 3.35E-08 | 0.207  | 0.085 | .    | .       | a |
| Chiroptera      | Phyllostomatidae | <i>Carollia</i>      | <i>perspicillata</i> | zoo  | 3.54 | 7.11E-04 | 0.173  | 0.202 | 58   | 16.12   |   |
| Chiroptera      | Pteropodidae     | <i>Pteropus</i>      | <i>rodricensis</i>   | zoo  | 3.86 | 8.36E-05 | 0.100  | 0.145 | 36   | 24.07   |   |
| Chiroptera      | Pteropodidae     | <i>Rousettus</i>     | <i>egyptiacus</i>    | zoo  | 3.70 | 2.39E-05 | 0.149  | 0.104 | 91   | 16.30   |   |
| Chiroptera      | Vespertilionidae | <i>Pipistrellus</i>  | <i>pipistrellus</i>  | wild | 5.49 | 2.30E-05 | 0.274  | 0.193 | .    | .       | a |
| Didelphimorphia | Didelphis        | <i>Didelphis</i>     | <i>vrginiana</i>     | zoo  | 3.56 | 6.15E-03 | 0.333  | 0.327 | 113  | 8.33    |   |
| Diprodonta      | Acrobatidae      | <i>Acrobatas</i>     | <i>pygmaeus</i>      | zoo  | 2.36 | 1.42E-02 | 0.107  | 0.282 | 19   | 8.76    |   |
| Diprodonta      | Macropodidae     | <i>Macropus</i>      | <i>rufus</i>         | zoo  | 2.45 | 3.62E-04 | 0.115  | 0.101 | 361  | 34.53   |   |
| Diprodonta      | Phascolarctidae  | <i>Phascolarctos</i> | <i>cinereus</i>      | zoo  | 1.40 | 7.74E-03 | 0.030  | 0.132 | 30   | 17.00   |   |
| Insectivora     | Erinaceidae      | <i>Atelerix</i>      | <i>albiventris</i>   | zoo  | 2.36 | 2.05E-02 | 0.056  | 0.314 | 196  | 9.68    |   |
| Lagomorpha      | Leporidae        | <i>Oryctolagus</i>   | <i>cuniculus</i>     | zoo  | 3.43 | 3.95E-04 | 0.218  | 0.171 | 145  | 13.57   |   |
| Lagomorpha      | Leporidae        | <i>Sylvilagus</i>    | <i>floridanus</i>    | wild | 4.80 | 9.93E-09 | 0.137  | 0.499 | .    | .       | a |
| Perrisodactyla  | Equidae          | <i>Equus</i>         | <i>burchelli</i>     | wild | .    | .        | 0.057  | 0.094 | .    | .       |   |
| Perrisodactyla  | Equidae          | <i>Equus</i>         | <i>burchelli</i>     | wild | .    | .        | 0.064  | 0.106 | .    | .       |   |
| Perrisodactyla  | Equidae          | <i>Equus</i>         | <i>burchelli</i>     | zoo  | 3.65 | 1.97E-06 | 0.034  | 0.059 | 119  | 29.84   |   |
| Perrisodactyla  | Equidae          | <i>Equus</i>         | <i>burchelli</i>     | zoo  | 3.49 | 2.27E-06 | 0.066  | 0.056 | 158  | 31.46   |   |
| Perrisodactyla  | Equidae          | <i>Equus</i>         | <i>burchelli</i>     | wild | 3.46 | 2.40E-05 | 0.042  | 0.092 | .    | .       | a |
| Perrisodactyla  | Equidae          | <i>Equus</i>         | <i>caballus</i>      | zoo  | 2.39 | 2.17E-04 | 0.011  | 0.083 | 3322 | 31.00   |   |
| Perrisodactyla  | Equidae          | <i>Equus</i>         | <i>caballus</i>      | zoo  | 2.27 | 3.21E-04 | 0.002  | 0.086 | 1535 | 30.00   |   |
| Perrisodactyla  | Equidae          | <i>Equus</i>         | <i>caballus</i>      | zoo  | 3.30 | 1.64E-06 | 0.034  | 0.045 | 135  | 33.05   |   |
| Perrisodactyla  | Equidae          | <i>Equus</i>         | <i>caballus</i>      | wild | 4.78 | 1.41E-07 | 0.000  | 0.065 | .    | .       | a |
| Perrisodactyla  | Equidae          | <i>Equus</i>         | <i>asinus</i>        | zoo  | 2.40 | 1.93E-04 | 0.054  | 0.081 | 44   | 39.0548 |   |
| Primates        | Callitrichidae   | <i>Callimico</i>     | <i>goeldii</i>       | zoo  | 1.81 | 2.02E-03 | 0.062  | 0.110 | 103  | 21.08   |   |



|          |                 |                       |                     |      |      |          |       |       |     |         |
|----------|-----------------|-----------------------|---------------------|------|------|----------|-------|-------|-----|---------|
| Primates | Callitrichidae  | <i>Callithrix</i>     | <i>geoffroyi</i>    | zoo  | 4.42 | 7.23E-06 | 0.161 | 0.113 | 94  | 13.09   |
| Primates | Callitrichidae  | <i>Callithrix</i>     | <i>jacchus</i>      | zoo  | 2.63 | 1.08E-04 | 0.247 | 0.081 | 133 | 18.48   |
| Primates | Callitrichidae  | <i>Callithrix</i>     | <i>penicillata</i>  | zoo  | 2.27 | 1.47E-03 | 0.193 | 0.136 | 25  | 12.42   |
| Primates | Callitrichidae  | <i>Callithrix</i>     | <i>pygmaea</i>      | zoo  | 2.89 | 1.29E-04 | 0.186 | 0.100 | 121 | 17.02   |
| Primates | Callitrichidae  | <i>Leontopithecus</i> | <i>rosalia</i>      | zoo  | 5.03 | 2.76E-07 | 0.115 | 0.082 | 316 | 24.78   |
| Primates | Callitrichidae  | <i>Saguinus</i>       | <i>imperator</i>    | zoo  | 4.36 | 3.94E-06 | 0.096 | 0.098 | 88  | 19.23   |
| Primates | Callitrichidae  | <i>Saguinus</i>       | <i>midas</i>        | zoo  | 1.59 | 6.13E-03 | 0.098 | 0.140 | 30  | 15.50   |
| Primates | Callitrichidae  | <i>Saguinus</i>       | <i>oedipus</i>      | zoo  | 3.32 | 1.18E-05 | 0.143 | 0.072 | 346 | 24.94   |
| Primates | Cebidae         | <i>Alouatta</i>       | <i>caraya</i>       | zoo  | 0.96 | 7.61E-03 | 0.051 | 0.083 | 36  | 26.05   |
| Primates | Cebidae         | <i>Ateles</i>         | <i>fusciceps</i>    | zoo  | 1.58 | 1.05E-03 | 0.058 | 0.070 | 32  | 31.31   |
| Primates | Cebidae         | <i>Ateles</i>         | <i>geoffroyi</i>    | zoo  | 3.65 | 1.85E-07 | 0.049 | 0.036 | 55  | 41.99   |
| Primates | Cebidae         | <i>Cebus</i>          | <i>apella</i>       | zoo  | 5.20 | 1.00E-10 | 0.091 | 0.024 | 62  | 46.18   |
| Primates | Cebidae         | <i>Cebus</i>          | <i>capucinus</i>    | zoo  | 4.52 | 5.66E-08 | 0.092 | 0.049 | 24  | 47.95   |
| Primates | Cebidae         | <i>Pithecia</i>       | <i>pithecia</i>     | zoo  | 5.37 | 4.44E-09 | 0.163 | 0.049 | 89  | 36.18   |
| Primates | Cebidae         | <i>Saimiri</i>        | <i>boliviensis</i>  | zoo  | 3.72 | 1.06E-05 | 0.028 | 0.088 | 48  | 23.01   |
| Primates | Cebidae         | <i>Saimiri</i>        | <i>sciureus</i>     | zoo  | 1.52 | 2.18E-03 | 0.051 | 0.088 | 233 | 37.75   |
| Primates | Cebidae         | <i>Saimiri</i>        | <i>sciureus</i>     | zoo  | 3.56 | 1.73E-05 | 0.076 | 0.090 | 29  | 18.71   |
| Primates | Cercopithecidae | <i>Cercocebus</i>     | <i>torquatus</i>    | zoo  | 4.09 | 8.68E-07 | 0.064 | 0.064 | 34  | 25.96   |
| Primates | Cercopithecidae | <i>Cercopithecus</i>  | <i>diana</i>        | zoo  | 2.71 | 2.87E-05 | 0.053 | 0.060 | 60  | 32.78   |
| Primates | Cercopithecidae | <i>Cercopithecus</i>  | <i>neglectus</i>    | zoo  | 0.74 | 1.78E-02 | 0.016 | 0.099 | 128 | 30.76   |
| Primates | Cercopithecidae | <i>Erythrocebus</i>   | <i>patas</i>        | zoo  | 3.29 | 1.37E-05 | 0.053 | 0.073 | 115 | 27.91   |
| Primates | Cercopithecidae | <i>Macaca</i>         | <i>fascicularis</i> | zoo  | 2.97 | 9.96E-06 | 0.075 | 0.055 | 48  | 29.85   |
| Primates | Cercopithecidae | <i>Macaca</i>         | <i>fuscata</i>      | zoo  | 4.95 | 2.59E-09 | 0.051 | 0.036 | 26  | 39.66   |
| Primates | Cercopithecidae | <i>Macaca</i>         | <i>mulatta</i>      | zoo  | 4.02 | 7.13E-07 | 0.014 | 0.060 | 16  | 28.70   |
| Primates | Cercopithecidae | <i>Macaca</i>         | <i>nemestrina</i>   | zoo  | 4.25 | 5.24E-08 | 0.066 | 0.041 | 44  | 32.06   |
| Primates | Cercopithecidae | <i>Macaca</i>         | <i>nigra</i>        | zoo  | 2.36 | 1.25E-04 | 0.057 | 0.069 | 97  | 45.13   |
| Primates | Cercopithecidae | <i>Macaca</i>         | <i>silenus</i>      | zoo  | 3.60 | 5.41E-07 | 0.042 | 0.043 | 88  | 38.4192 |
| Primates | Cercopithecidae | <i>Macaca</i>         | <i>sylvanus</i>     | zoo  | 3.25 | 1.22E-05 | 0.057 | 0.070 | 48  | 25.7781 |
| Primates | Cercopithecidae | <i>Mandrillus</i>     | <i>sphinx</i>       | zoo  | 3.02 | 1.20E-05 | 0.043 | 0.060 | 204 | 39.58   |
| Primates | Cercopithecidae | <i>Papio</i>          | <i>hyamadryas</i>   | zoo  | 2.12 | 1.80E-04 | 0.065 | 0.063 | 37  | 29.99   |
| Primates | Cercopithecidae | <i>Theropithecus</i>  | <i>gelada</i>       | zoo  | 2.72 | 4.43E-05 | 0.040 | 0.068 | 102 | 32.78   |
| Primates | Cercopithecidae | <i>Macaca</i>         | <i>mulata</i>       | wild | .    | .        | 0.087 | 0.059 | .   | .       |
| Primates | Hominidae       | <i>Gorilla</i>        | <i>gorilla</i>      | zoo  | 2.95 | 1.90E-06 | 0.026 | 0.036 | 35  | 54.01   |
| Primates | Hominidae       | <i>Pan</i>            | <i>trogodytes</i>   | zoo  | 3.45 | 2.07E-07 | 0.042 | 0.032 | 68  | 55.22   |
| Primates | Hominidae       | <i>Pan</i>            | <i>trogodytes</i>   | wild | .    | .        | 0.055 | 0.045 | .   | .       |
| Primates | Hominidae       | <i>Pan</i>            | <i>trogodytes</i>   | wild | 1.85 | 1.15E-04 | 0.018 | 0.042 | .   | .       |
| Primates | Hominidae       | <i>Pongo</i>          | <i>pygmaeus</i>     | zoo  | 3.65 | 1.78E-07 | 0.029 | 0.035 | 35  | 44.48   |
| Primates | Hylobatidae     | <i>Hylobates</i>      | <i>lar</i>          | zoo  | 3.92 | 3.26E-07 | 0.052 | 0.048 | 99  | 40.26   |
| Primates | Hylobatidae     | <i>Hylobates</i>      | <i>syndactylus</i>  | zoo  | 4.65 | 7.16E-09 | 0.069 | 0.036 | 47  | 40.03   |
| Primates | Lemuridae       | <i>Eulemur</i>        | <i>fulvus</i>       | zoo  | 2.58 | 3.53E-05 | 0.053 | 0.057 | 17  | 34.0877 |

a

|             |                |                       |                     |      |       |          |       |       |     |         |   |
|-------------|----------------|-----------------------|---------------------|------|-------|----------|-------|-------|-----|---------|---|
| Primates    | Lemuridae      | <i>Eulemur</i>        | <i>macaco</i>       | zoo  | 4.28  | 1.75E-06 | 0.044 | 0.081 | 29  | 26.063  |   |
| Primates    | Lemuridae      | <i>Eulemur</i>        | <i>mongoz</i>       | zoo  | 4.00  | 3.08E-07 | 0.040 | 0.050 | 49  | 80.337  |   |
| Primates    | Lemuridae      | <i>Galago</i>         | <i>senegalensis</i> | zoo  | 1.22  | 1.63E-02 | 0.095 | 0.156 | 228 | 21.38   |   |
| Primates    | Lemuridae      | <i>Lemur</i>          | <i>catta</i>        | zoo  | 3.70  | 1.42E-06 | 0.051 | 0.057 | 239 | 35.6658 |   |
| Primates    | Lemuridae      | <i>Microcebus</i>     | <i>murinus</i>      | zoo  | 1.72  | 4.94E-03 | 0.026 | 0.142 | 162 | 17.95   |   |
| Primates    | Lemuridae      | <i>Mirouga</i>        | <i>leonina</i>      | wild | 4.45  | 1.44E-06 | 0.205 | 0.085 | .   | .       | a |
| Primates    | Lemuridae      | <i>Nycticebus</i>     | <i>coucang</i>      | zoo  | 2.04  | 5.92E-04 | 0.072 | 0.087 | 151 | 25.54   |   |
| Primates    | Lemuridae      | <i>Varecia</i>        | <i>variegata</i>    | zoo  | 2.03  | 7.66E-04 | 0.031 | 0.093 | 60  | 30.44   |   |
| Proboscidea | Elephantidae   | <i>Elephas</i>        | <i>maximus</i>      | zoo  | 3.76  | 1.42E-07 | 0.002 | 0.036 | 13  | 74.3534 |   |
| Proboscidea | Elephantidae   | <i>Loxodonta</i>      | <i>africana</i>     | wild | .     | .        | 0.040 | 0.036 | .   | .       |   |
| Proboscidea | Elephantidae   | <i>Loxodonta</i>      | <i>africana</i>     | zoo  | 2.29  | 1.08E-04 | 0.007 | 0.062 | 66  | 42.14   |   |
| Rodentia    | Bathyergidae   | <i>Heterocephalus</i> | <i>glaber</i>       | zoo  | 2.68  | 4.95E-04 | 0.162 | 0.127 | 62  | 11.41   |   |
| Rodentia    | Castoridae     | <i>Castor</i>         | <i>canadensis</i>   | zoo  | 2.63  | 4.04E-04 | 0.087 | 0.116 | 67  | 18.31   |   |
| Rodentia    | Caviidae       | <i>Cavia</i>          | <i>porcellus</i>    | zoo  | 3.14  | 3.02E-03 | 0.246 | 0.246 | 138 | 7.46    |   |
| Rodentia    | Caviidae       | <i>Dolichotis</i>     | <i>patagonum</i>    | zoo  | 1.64  | 5.14E-03 | 0.203 | 0.135 | 448 | 20.937  |   |
| Rodentia    | Chinchillidae  | <i>Chinchilla</i>     | <i>lanigera</i>     | zoo  | 1.71  | 4.52E-03 | 0.176 | 0.137 | 195 | 25.79   |   |
| Rodentia    | Dasyproctidae  | <i>Dasyprocta</i>     | <i>leporina</i>     | zoo  | 4.32  | 2.11E-04 | 0.241 | 0.203 | 22  | 17.38   |   |
| Rodentia    | Dasyproctidae  | <i>Dasyprocta</i>     | <i>punctata</i>     | zoo  | 2.32  | 3.22E-03 | 0.090 | 0.178 | 54  | 12.03   |   |
| Rodentia    | Erethizontidae | <i>Erethizon</i>      | <i>dorsatum</i>     | zoo  | 1.02  | 6.34E-03 | 0.117 | 0.082 | 75  | 21.02   |   |
| Rodentia    | Hydrochaeridae | <i>Hydrochaeris</i>   | <i>hydrochaeris</i> | zoo  | 3.87  | 1.80E-05 | 0.212 | 0.106 | 326 | 16.75   |   |
| Rodentia    | Hystricidae    | <i>Hystrix</i>        | <i>cristata</i>     | zoo  | 3.67  | 3.42E-06 | 0.059 | 0.068 | 61  | 27.76   |   |
| Rodentia    | Hystricidae    | <i>Hystrix</i>        | <i>indica</i>       | zoo  | 4.00  | 2.66E-06 | 0.069 | 0.077 | 29  | 23.56   |   |
| Rodentia    | Muridae        | <i>Acomys</i>         | <i>cahirinus</i>    | zoo  | 2.12  | 1.59E-02 | 0.232 | 0.265 | 77  | 7.92    |   |
| Rodentia    | Muridae        | <i>Apodemus</i>       | <i>flaveolus</i>    | wild | 5.48  | 9.32E-08 | 0.224 | 0.987 | .   | .       | a |
| Rodentia    | Muridae        | <i>Mus</i>            | <i>musculus</i>     | zoo  | 7.62  | 1.50E-04 | 0.022 | 0.360 | 35  | 3.84    |   |
| Rodentia    | Muridae        | <i>Mus</i>            | <i>musculus</i>     | zoo  | 14.68 | 1.25E-06 | 0.026 | 0.420 | 54  | 3.02    |   |
| Rodentia    | Muridae        | <i>Mus</i>            | <i>musculus</i>     | zoo  | 6.81  | 2.76E-03 | 0.005 | 0.470 | 691 | 3.16    |   |
| Rodentia    | Muridae        | <i>Mus</i>            | <i>musculus</i>     | zoo  | 7.29  | 2.25E-03 | 0.085 | 0.479 | 60  | 3.08    |   |
| Rodentia    | Muridae        | <i>Mustela</i>        | <i>ermina</i>       | wild | 1.81  | 3.58E-03 | 0.017 | 0.135 | .   | .       | a |
| Rodentia    | Muridae        | <i>Rattus</i>         | <i>norvegicus</i>   | zoo  | 3.47  | 9.43E-02 | 0.263 | 0.590 | 109 | 4.10    |   |
| Rodentia    | Muridae        | <i>Rattus</i>         | <i>rattus</i>       | zoo  | 5.06  | 5.85E-03 | 0.031 | 0.428 | 123 | 3.85    |   |
| Rodentia    | Muridae        | <i>Rattus</i>         | <i>rattus</i>       | zoo  | 3.51  | 3.10E-02 | 0.004 | 0.463 | 210 | 3.22    |   |
| Rodentia    | Muridae        | <i>Rattus</i>         | <i>rattus</i>       | zoo  | 4.00  | 5.88E-02 | 0.422 | 0.567 | 23  | 5.99    |   |
| Rodentia    | Muridae        | <i>Rattus</i>         | <i>rattus</i>       | zoo  | 9.98  | 4.22E-03 | 0.000 | 0.608 | 115 | 2.47    |   |
| Rodentia    | Sciuridae      | <i>Callosciurus</i>   | <i>prevostii</i>    | zoo  | 3.12  | 2.11E-04 | 0.184 | 0.128 | 92  | 14.47   |   |
| Rodentia    | Sciuridae      | <i>Cynomys</i>        | <i>ludovicianus</i> | zoo  | 2.43  | 3.62E-03 | 0.099 | 0.194 | 205 | 17.73   |   |
| Rodentia    | Sciuridae      | <i>Tamiasciurus</i>   | <i>hudsonicus</i>   | wild | .     | .        | 0.437 | 0.213 | .   | .       |   |
| Scandentia  | Tupaiaidae     | <i>Tupaia</i>         | <i>glis</i>         | zoo  | 2.15  | 2.18E-03 | 0.214 | 0.143 | 190 | 14.48   |   |
| Scandentia  | Tupaiaidae     | <i>Tupaia</i>         | <i>glis</i>         | zoo  | 2.97  | 1.80E-05 | 0.056 | 0.064 | .   | .       | a |
| Scandentia  | Tupaiaidae     | <i>Tupaia</i>         | <i>minor</i>        | zoo  | 4.28  | 4.49E-05 | 0.274 | 0.150 | 104 | 9.32    |   |

|            |              |                  |                     |     |      |          |       |       |    |       |
|------------|--------------|------------------|---------------------|-----|------|----------|-------|-------|----|-------|
| Scandentia | Tupaiaidae   | <i>Tupaia</i>    | <i>tana</i>         | zoo | 3.49 | 1.86E-04 | 0.184 | 0.148 | 26 | 9.68  |
| Xenarthra  | Bradypodidae | <i>Choloepus</i> | <i>didactylus</i>   | zoo | 1.77 | 8.57E-03 | 0.197 | 0.179 | 21 | 23.46 |
| Xenarthra  | Dasypodidae  | <i>Dasypus</i>   | <i>novemcinctus</i> | zoo | 8.68 | 3.99E-09 | 0.240 | 0.136 | 51 | 18.47 |

## Birds

All data are from captive populations. Additional values for a small number of wild populations (4) were excluded to ensure uniformity of the data.

| Order        | Family   | Genus            | Species              | <i>b</i> | <i>a</i> | <i>m</i> <sub>0</sub> | ω     | <i>n</i> | oldest |
|--------------|----------|------------------|----------------------|----------|----------|-----------------------|-------|----------|--------|
| Anseriformes | Anatidae | <i>Aix</i>       | <i>galericulata</i>  | 4.67     | 3.77E-06 | 0.146                 | 0.111 | 304      | 18.8   |
| Anseriformes | Anatidae | <i>Aix</i>       | <i>sponsa</i>        | 2.79     | 1.40E-04 | 0.138                 | 0.096 | 210      | 26.6   |
| Anseriformes | Anatidae | <i>Alopochen</i> | <i>aegyptiacus</i>   | 3.32     | 2.26E-05 | 0.099                 | 0.084 | 113      | 25.1   |
| Anseriformes | Anatidae | <i>Anas</i>      | <i>acuta</i>         | 2.46     | 3.64E-04 | 0.108                 | 0.101 | 218      | 20.3   |
| Anseriformes | Anatidae | <i>Anas</i>      | <i>capensis</i>      | 2.16     | 1.95E-03 | 0.110                 | 0.139 | 101      | 27.5   |
| Anseriformes | Anatidae | <i>Anas</i>      | <i>castanea</i>      | 1.29     | 6.85E-03 | 0.039                 | 0.113 | 46       | 41.2   |
| Anseriformes | Anatidae | <i>Anas</i>      | <i>clypeata</i>      | 2.93     | 1.64E-04 | 0.139                 | 0.109 | 108      | 17.5   |
| Anseriformes | Anatidae | <i>Anas</i>      | <i>penelope</i>      | 7.26     | 6.46E-09 | 0.129                 | 0.102 | 85       | 25.2   |
| Anseriformes | Anatidae | <i>Anas</i>      | <i>platyrhynchos</i> | 1.33     | 4.50E-03 | 0.096                 | 0.098 | 210      | 30.9   |
| Anseriformes | Anatidae | <i>Anas</i>      | <i>rubripes</i>      | 1.91     | 5.68E-03 | 0.024                 | 0.170 | 29       | 18.3   |
| Anseriformes | Anatidae | <i>Anas</i>      | <i>strepera</i>      | 4.17     | 1.43E-05 | 0.064                 | 0.115 | 66       | 17.4   |
| Anseriformes | Anatidae | <i>Anas</i>      | <i>sibilatrix</i>    | 2.04     | 1.12E-03 | 0.063                 | 0.107 | 71       | 22.5   |
| Anseriformes | Anatidae | <i>Anser</i>     | <i>albifrons</i>     | 3.64     | 1.93E-06 | 0.041                 | 0.059 | 29       | 28.3   |
| Anseriformes | Anatidae | <i>Anser</i>     | <i>anser</i>         | 4.69     | 5.29E-07 | 0.061                 | 0.079 | 22       | 31.9   |
| Anseriformes | Anatidae | <i>Anser</i>     | <i>cygnoides</i>     | 1.11     | 9.43E-03 | 0.031                 | 0.109 | 38       | 24.8   |
| Anseriformes | Anatidae | <i>Anser</i>     | <i>indicus</i>       | 2.43     | 9.85E-05 | 0.029                 | 0.068 | 45       | 36.4   |
| Anseriformes | Anatidae | <i>Anser</i>     | <i>rossi</i>         | 2.75     | 5.97E-04 | 0.057                 | 0.138 | 46       | 22.9   |
| Anseriformes | Anatidae | <i>Aythya</i>    | <i>americana</i>     | 1.29     | 5.56E-03 | 0.048                 | 0.103 | 137      | 30.1   |
| Anseriformes | Anatidae | <i>Aythya</i>    | <i>ferina</i>        | 2.91     | 1.27E-04 | 0.027                 | 0.101 | 36       | 26.6   |
| Anseriformes | Anatidae | <i>Aythya</i>    | <i>fuligula</i>      | 2.37     | 5.03E-04 | 0.050                 | 0.105 | 76       | 29.2   |
| Anseriformes | Anatidae | <i>Aythya</i>    | <i>nyroca</i>        | 2.16     | 7.05E-04 | 0.068                 | 0.101 | 50       | 18.8   |
| Anseriformes | Anatidae | <i>Branta</i>    | <i>bernicla</i>      | 3.32     | 1.61E-05 | 0.042                 | 0.078 | 21       | 35.7   |
| Anseriformes | Anatidae | <i>Branta</i>    | <i>canadensis</i>    | 2.74     | 5.94E-05 | 0.042                 | 0.074 | 115      | 31.4   |
| Anseriformes | Anatidae | <i>Branta</i>    | <i>leucopsis</i>     | 2.06     | 4.82E-04 | 0.042                 | 0.083 | 41       | 38.3   |
| Anseriformes | Anatidae | <i>Branta</i>    | <i>ruficollis</i>    | 1.49     | 3.48E-03 | 0.019                 | 0.103 | 94       | 36.2   |
| Anseriformes | Anatidae | <i>Branta</i>    | <i>sandvicensis</i>  | 2.89     | 3.53E-05 | 0.055                 | 0.072 | 46       | 27.1   |
| Anseriformes | Anatidae | <i>Bucephala</i> | <i>clangula</i>      | 2.99     | 4.37E-05 | 0.105                 | 0.081 | 65       | 19.9   |
| Anseriformes | Anatidae | <i>Cairinia</i>  | <i>moschata</i>      | 2.21     | 9.72E-04 | 0.148                 | 0.115 | 51       | 37.8   |

|               |                |                      |                             |      |          |       |       |     |      |
|---------------|----------------|----------------------|-----------------------------|------|----------|-------|-------|-----|------|
| Anseriformes  | Anatidae       | <i>Callonetta</i>    | <i>leucophrys</i>           | 2.02 | 1.05E-03 | 0.070 | 0.103 | 139 | 25.4 |
| Anseriformes  | Anatidae       | <i>Cereopsis</i>     | <i>novaehollandiae</i>      | 2.20 | 2.15E-04 | 0.055 | 0.072 | 41  | 31.6 |
| Anseriformes  | Anatidae       | <i>Cygnus</i>        | <i>atratus</i>              | 3.39 | 5.91E-06 | 0.063 | 0.065 | 72  | 31.0 |
| Anseriformes  | Anatidae       | <i>Cygnus</i>        | <i>cygnus_buccinator</i>    | 2.90 | 1.76E-05 | 0.046 | 0.061 | 40  | 40.5 |
| Anseriformes  | Anatidae       | <i>Cygnus</i>        | <i>melanocoryphus</i>       | 4.30 | 1.89E-08 | 0.086 | 0.035 | 58  | 26.7 |
| Anseriformes  | Anatidae       | <i>Cygnus</i>        | <i>olor</i>                 | 3.26 | 6.56E-06 | 0.056 | 0.061 | 61  | 27.3 |
| Anseriformes  | Anatidae       | <i>Marmaronetta</i>  | <i>anguirostris</i>         | 7.90 | 2.15E-10 | 0.165 | 0.082 | 73  | 13.9 |
| Anseriformes  | Anatidae       | <i>Mergus</i>        | <i>cucullatus</i>           | 2.96 | 1.62E-04 | 0.082 | 0.110 | 148 | 23.2 |
| Anseriformes  | Anatidae       | <i>Mergus</i>        | <i>merganser</i>            | 3.28 | 6.51E-05 | 0.119 | 0.105 | 55  | 16.0 |
| Anseriformes  | Anatidae       | <i>Netta</i>         | <i>peposaca</i>             | 4.49 | 2.31E-07 | 0.089 | 0.062 | 92  | 26.4 |
| Anseriformes  | Anatidae       | <i>Netta</i>         | <i>rufina</i>               | 2.26 | 4.64E-04 | 0.123 | 0.095 | 119 | 30.0 |
| Anseriformes  | Anatidae       | <i>Oxyura</i>        | <i>jamaicensis</i>          | 2.72 | 1.99E-04 | 0.109 | 0.101 | 106 | 24.0 |
| Anseriformes  | Anatidae       | <i>Somateria</i>     | <i>mollissima</i>           | 0.64 | 1.49E-02 | 0.144 | 0.077 | 106 | 20.8 |
| Anseriformes  | Anatidae       | <i>Tadorna</i>       | <i>ferruginea</i>           | 1.22 | 3.00E-03 | 0.084 | 0.073 | 87  | 26.9 |
| Anseriformes  | Anatidae       | <i>Tadorna</i>       | <i>tadorna</i>              | 2.33 | 6.33E-04 | 0.044 | 0.110 | 109 | 29.8 |
| Anseriformes  | Dendrocygnidae | <i>Dendrocygna</i>   | <i>bicolor</i>              | 3.73 | 1.55E-06 | 0.163 | 0.059 | 110 | 28.3 |
| Anseriformes  | Dendrocygnidae | <i>Dendrocygna</i>   | <i>autumnalis</i>           | 1.38 | 7.09E-03 | 0.021 | 0.125 | 70  | 29.6 |
| Anseriformes  | Dendrocygnidae | <i>Dendrocygna</i>   | <i>viduata</i>              | 3.27 | 3.93E-05 | 0.107 | 0.093 | 153 | 24.0 |
| Ciconiiformes | Accipitridae   | <i>Aquila</i>        | <i>chrysaetos</i>           | 3.83 | 2.75E-07 | 0.042 | 0.044 | 34  | 41.1 |
| Ciconiiformes | Accipitridae   | <i>Aquila</i>        | <i>rapax</i>                | 2.74 | 2.38E-05 | 0.025 | 0.058 | 12  | 29.8 |
| Ciconiiformes | Accipitridae   | <i>Buteo</i>         | <i>jamaicensis</i>          | 2.41 | 8.90E-05 | 0.060 | 0.065 | 37  | 36.6 |
| Ciconiiformes | Accipitridae   | <i>Falco</i>         | <i>sparverius</i>           | 2.56 | 4.56E-03 | 0.160 | 0.220 | 20  | 9.6  |
| Ciconiiformes | Accipitridae   | <i>Falco</i>         | <i>tinnunculus</i>          | 0.66 | 7.69E-02 | 0.026 | 0.213 | 25  | 16.2 |
| Ciconiiformes | Accipitridae   | <i>Gyps</i>          | <i>fulvus</i>               | 3.52 | 4.38E-08 | 0.023 | 0.024 | 9   | 40.7 |
| Ciconiiformes | Accipitridae   | <i>Haliaeetus</i>    | <i>leucocephalus</i>        | 3.76 | 6.12E-07 | 0.026 | 0.050 | 31  | 43.5 |
| Ciconiiformes | Accipitridae   | <i>Milvus</i>        | <i>migrans</i>              | 3.74 | 2.11E-05 | 0.114 | 0.103 | 14  | 27.9 |
| Ciconiiformes | Ardeidae       | <i>Ardea</i>         | <i>cinerea</i>              | 2.70 | 4.13E-05 | 0.066 | 0.065 | 17  | 25.8 |
| Ciconiiformes | Ardeidae       | <i>Ardeola</i>       | <i>ibis</i>                 | 4.65 | 9.76E-08 | 0.082 | 0.058 | 34  | 29.0 |
| Ciconiiformes | Ardeidae       | <i>Egretta</i>       | <i>thula</i>                | 4.07 | 7.21E-07 | 0.023 | 0.061 | 10  | 29.5 |
| Ciconiiformes | Ardeidae       | <i>Nycticorax</i>    | <i>nycticorax</i>           | 2.44 | 2.95E-05 | 0.086 | 0.048 | 56  | 30.0 |
| Ciconiiformes | Charadriidae   | <i>Himantopus</i>    | <i>himantopus_mexicanus</i> | 2.65 | 4.76E-05 | 0.028 | 0.065 | 33  | 28.4 |
| Ciconiiformes | Charadriidae   | <i>Recurvirostra</i> | <i>avosetta</i>             | 3.96 | 5.29E-06 | 0.081 | 0.087 | 18  | 20.4 |
| Ciconiiformes | Charadriidae   | <i>Vanellus</i>      | <i>armatus</i>              | 2.28 | 4.14E-04 | 0.074 | 0.093 | 29  | 18.6 |
| Ciconiiformes | Charadriidae   | <i>Vanellus</i>      | <i>miles</i>                | 6.85 | 2.37E-06 | 0.212 | 0.192 | 15  | 16.8 |
| Ciconiiformes | Charadriidae   | <i>Vanellus</i>      | <i>spinus</i>               | 2.55 | 4.80E-04 | 0.124 | 0.116 | 92  | 22.7 |
| Ciconiiformes | Ciconiidae     | <i>Ciconia</i>       | <i>ciconia</i>              | 3.99 | 3.10E-07 | 0.052 | 0.050 | 48  | 41.9 |
| Ciconiiformes | Ciconiidae     | <i>Ciconia</i>       | <i>nigra</i>                | 4.97 | 4.97E-07 | 0.098 | 0.088 | 19  | 44.7 |
| Ciconiiformes | Ciconiidae     | <i>Leptoptilos</i>   | <i>crumeniferus</i>         | 3.88 | 7.24E-07 | 0.081 | 0.055 | 46  | 29.9 |
| Ciconiiformes | Ciconiidae     | <i>Sarcorhamphus</i> | <i>papa</i>                 | 4.03 | 1.48E-07 | 0.049 | 0.044 | 48  | 34.0 |
| Ciconiiformes | Ciconiidae     | <i>Vultur</i>        | <i>gryphus</i>              | 2.97 | 1.53E-06 | 0.034 | 0.034 | 11  | 70.5 |

|               |                   |                       |                        |      |          |       |       |     |      |
|---------------|-------------------|-----------------------|------------------------|------|----------|-------|-------|-----|------|
| Ciconiiformes | Laridae           | <i>Fratercula</i>     | <i>arctica</i>         | 2.23 | 1.55E-03 | 0.092 | 0.135 | 50  | 14.3 |
| Ciconiiformes | Laridae           | <i>Larosterna</i>     | <i>inca</i>            | 3.11 | 5.68E-05 | 0.065 | 0.093 | 73  | 28.7 |
| Ciconiiformes | Laridae           | <i>Lunda</i>          | <i>cirrhatta</i>       | 2.97 | 3.31E-05 | 0.004 | 0.074 | 20  | 28.5 |
| Ciconiiformes | Pelecanidae       | <i>Pelecanus</i>      | <i>crispus</i>         | 1.28 | 1.23E-03 | 0.037 | 0.053 | 17  | 34.1 |
| Ciconiiformes | Pelecanidae       | <i>Pelecanus</i>      | <i>erythrorhynchus</i> | 3.67 | 1.15E-06 | 0.085 | 0.053 | 42  | 28.9 |
| Ciconiiformes | Pelecanidae       | <i>Pelecanus</i>      | <i>occidentalis</i>    | 4.48 | 6.11E-07 | 0.136 | 0.073 | 169 | 20.3 |
| Ciconiiformes | Pelecanidae       | <i>Pelecanus</i>      | <i>onocrotalus</i>     | 2.17 | 2.26E-04 | 0.032 | 0.071 | 27  | 45.9 |
| Ciconiiformes | Pelecanidae       | <i>Pelecanus</i>      | <i>rufescens</i>       | 5.24 | 9.89E-07 | 0.145 | 0.109 | 32  | 15.4 |
| Ciconiiformes | Phalacrocoracidae | <i>Phalacrocorax</i>  | <i>carbo</i>           | 4.15 | 8.49E-07 | 0.024 | 0.066 | 14  | 21.3 |
| Ciconiiformes | Phoenicopteridae  | <i>Phoeniconaias</i>  | <i>minor</i>           | 2.97 | 3.33E-05 | 0.043 | 0.075 | 28  | 34.9 |
| Ciconiiformes | Phoenicopteridae  | <i>Phoenicopterus</i> | <i>chilensis</i>       | 3.28 | 2.15E-06 | 0.014 | 0.047 | 46  | 39.7 |
| Ciconiiformes | Phoenicopteridae  | <i>Phoenicopterus</i> | <i>ruber</i>           | 2.95 | 6.29E-06 | 0.011 | 0.048 | 97  | 42.1 |
| Ciconiiformes | Scopidae          | <i>Scopus</i>         | <i>umbretta</i>        | 4.72 | 5.42E-07 | 0.221 | 0.080 | 46  | 24.5 |
| Ciconiiformes | Spheniscidae      | <i>Aptenodytes</i>    | <i>patagonica</i>      | 4.19 | 1.24E-07 | 0.027 | 0.047 | 15  | 47.4 |
| Ciconiiformes | Spheniscidae      | <i>Eudyptes</i>       | <i>crestatus</i>       | 4.14 | 1.49E-07 | 0.041 | 0.047 | 10  | 48.2 |
| Ciconiiformes | Spheniscidae      | <i>Eudyptula</i>      | <i>minor</i>           | 3.26 | 1.19E-04 | 0.059 | 0.120 | 26  | 22.4 |
| Ciconiiformes | Spheniscidae      | <i>Spheniscus</i>     | <i>demersus</i>        | 3.60 | 1.82E-06 | 0.048 | 0.057 | 62  | 31.2 |
| Ciconiiformes | Spheniscidae      | <i>Spheniscus</i>     | <i>humboldti</i>       | 3.14 | 6.90E-06 | 0.054 | 0.057 | 62  | 32.3 |
| Ciconiiformes | Spheniscidae      | <i>Spheniscus</i>     | <i>magellanicus</i>    | 2.31 | 1.85E-03 | 0.033 | 0.149 | 33  | 23.5 |
| Ciconiiformes | Threskiornithidae | <i>Ajaja</i>          | <i>ajaja</i>           | 2.74 | 7.51E-05 | 0.044 | 0.079 | 85  | 26.0 |
| Ciconiiformes | Threskiornithidae | <i>Eudocimus</i>      | <i>albus</i>           | 3.97 | 2.09E-06 | 0.077 | 0.072 | 54  | 33.9 |
| Ciconiiformes | Threskiornithidae | <i>Eudocimus</i>      | <i>ruber</i>           | 2.67 | 7.92E-05 | 0.031 | 0.076 | 142 | 31.0 |
| Ciconiiformes | Threskiornithidae | <i>Geronticus</i>     | <i>eremita</i>         | 5.02 | 1.90E-09 | 0.067 | 0.036 | 21  | 33.6 |
| Ciconiiformes | Threskiornithidae | <i>Platalea</i>       | <i>alba</i>            | 0.91 | 6.45E-03 | 0.094 | 0.071 | 18  | 20.9 |
| Ciconiiformes | Threskiornithidae | <i>Platalea</i>       | <i>leucorodia</i>      | 3.27 | 4.76E-05 | 0.079 | 0.097 | 19  | 25.0 |
| Ciconiiformes | Threskiornithidae | <i>Plegadis</i>       | <i>falcinellus</i>     | 3.75 | 1.08E-06 | 0.046 | 0.056 | 24  | 35.5 |
| Ciconiiformes | Threskiornithidae | <i>Threskiornis</i>   | <i>aethiopicus</i>     | 3.67 | 6.03E-06 | 0.040 | 0.076 | 56  | 29.5 |
| Coliiformes   | Coliidae          | <i>Colius</i>         | <i>striatus</i>        | 3.32 | 1.31E-04 | 0.140 | 0.126 | 92  | 15.3 |
| Columbiformes | Columbidae        | <i>Caloenas</i>       | <i>nicobarica</i>      | 3.12 | 1.30E-05 | 0.050 | 0.065 | 64  | 29.4 |
| Columbiformes | Columbidae        | <i>Columba</i>        | <i>guinea</i>          | 2.17 | 3.93E-04 | 0.008 | 0.084 | 12  | 33.5 |
| Columbiformes | Columbidae        | <i>Columba</i>        | <i>livia</i>           | 4.87 | 7.29E-07 | 0.204 | 0.090 | 12  | 15.4 |
| Columbiformes | Columbidae        | <i>Ducula</i>         | <i>bicolor</i>         | 2.91 | 5.68E-05 | 0.053 | 0.082 | 22  | 24.1 |
| Columbiformes | Columbidae        | <i>Gallucolumba</i>   | <i>luzonica</i>        | 4.63 | 1.55E-07 | 0.107 | 0.062 | 47  | 21.2 |
| Columbiformes | Columbidae        | <i>Geopelia</i>       | <i>cuneata</i>         | 2.19 | 3.43E-03 | 0.157 | 0.168 | 146 | 16.7 |
| Columbiformes | Columbidae        | <i>Geopelia</i>       | <i>striata</i>         | 2.00 | 1.46E-03 | 0.013 | 0.114 | 24  | 23.3 |
| Columbiformes | Columbidae        | <i>Goura</i>          | <i>victoria</i>        | 2.56 | 8.98E-05 | 0.079 | 0.073 | 59  | 33.0 |
| Columbiformes | Columbidae        | <i>Ocyphaps</i>       | <i>lophotes</i>        | 0.87 | 2.59E-02 | 0.007 | 0.142 | 38  | 20.5 |
| Columbiformes | Columbidae        | <i>Ptilinopus</i>     | <i>jambu</i>           | 2.19 | 1.89E-03 | 0.227 | 0.140 | 53  | 11.6 |
| Columbiformes | Columbidae        | <i>Streptopelia</i>   | <i>risoria</i>         | 4.90 | 2.49E-06 | 0.182 | 0.112 | 38  | 17.5 |
| Coraciiformes | Bucerotidae       | <i>Aceros</i>         | <i>undulatus</i>       | 2.89 | 4.98E-05 | 0.025 | 0.078 | 17  | 26.4 |

|                 |               |                     |                         |      |          |       |       |        |       |
|-----------------|---------------|---------------------|-------------------------|------|----------|-------|-------|--------|-------|
| Coraciiformes   | Bucerotidae   | <i>Bucorvus</i>     | <i>abyssinicus</i>      | 1.02 | 1.63E-03 | 0.047 | 0.042 | 8      | 48.6  |
| Coraciiformes   | Bucerotidae   | <i>Tookus</i>       | <i>erythrorhynchus</i>  | 4.86 | 7.97E-08 | 0.120 | 0.062 | 18     | 23.6  |
| Coraciiformes   | Coraciidae    | <i>Coracias</i>     | <i>caudata</i>          | 3.41 | 5.08E-05 | 0.131 | 0.106 | 68     | 16.5  |
| Coraciiformes   | Dacelonidae   | <i>Dacelo</i>       | <i>novaeguineae</i>     | 2.60 | 7.52E-05 | 0.061 | 0.071 | 85     | 28.9  |
| Coraciiformes   | Momotidae     | <i>Momotus</i>      | <i>momota</i>           | 3.71 | 8.90E-06 | 0.046 | 0.085 | 34     | 30.3  |
| Craciformes     | Megapodiidae  | <i>Alectura</i>     | <i>lathamii</i>         | 3.12 | 8.54E-05 | 0.065 | 0.103 | 36     | 21.0  |
| Galliformes     | Numididae     | <i>Acryllium</i>    | <i>vulturinum</i>       | 1.12 | 1.44E-02 | 0.071 | 0.135 | 141    | 21.2  |
| Galliformes     | Numididae     | <i>Numida</i>       | <i>meleagris</i>        | 2.58 | 1.04E-03 | 0.168 | 0.147 | 145    | 20.0  |
| Galliformes     | Phasianidae   | <i>Alectoris</i>    | <i>chukar</i>           | 2.11 | 2.33E-02 | 0.062 | 0.299 | 55     | 12.4  |
| Galliformes     | Phasianidae   | <i>Chrysolophus</i> | <i>amherstiae</i>       | 3.23 | 4.75E-05 | 0.119 | 0.095 | 69     | 23.5  |
| Galliformes     | Phasianidae   | <i>Chrysolophus</i> | <i>pictus</i>           | 3.09 | 0.00     | 0.14  | 0.13  | 109.00 | 20.05 |
| Galliformes     | Phasianidae   | <i>Gallus</i>       | <i>gallus</i>           | 3.63 | 1.12E-04 | 0.173 | 0.140 | 59     | 12.4  |
| Galliformes     | Phasianidae   | <i>Lophophorus</i>  | <i>impeyanus</i>        | 4.19 | 3.17E-06 | 0.090 | 0.087 | 82     | 18.4  |
| Galliformes     | Phasianidae   | <i>Lophura</i>      | <i>edwardsi</i>         | 4.50 | 2.52E-07 | 0.103 | 0.063 | 37     | 19.6  |
| Galliformes     | Phasianidae   | <i>Lophura</i>      | <i>nycthemera</i>       | 0.68 | 8.45E-02 | 0.006 | 0.229 | 93     | 21.6  |
| Galliformes     | Phasianidae   | <i>Meleagris</i>    | <i>gallopavo</i>        | 2.46 | 1.07E-03 | 0.106 | 0.138 | 147    | 20.5  |
| Galliformes     | Phasianidae   | <i>Pavo</i>         | <i>cristatus</i>        | 3.28 | 7.29E-05 | 0.109 | 0.108 | 187    | 20.3  |
| Galliformes     | Phasianidae   | <i>Phasianus</i>    | <i>colchicus</i>        | 2.01 | 1.90E-03 | 0.162 | 0.124 | 66     | 17.3  |
| Galliformes     | Phasianidae   | <i>Rollulus</i>     | <i>roulroul</i>         | 1.10 | 2.27E-02 | 0.104 | 0.165 | 159    | 40.8  |
| Galliformes     | Phasianidae   | <i>Syrnaticus</i>   | <i>reevesi</i>          | 2.87 | 6.90E-04 | 0.148 | 0.152 | 75     | 13.7  |
| Galliformes     | Phasianidae   | <i>Tympanuchus</i>  | <i>cupido_attwateri</i> | 2.94 | 8.85E-03 | 0.425 | 0.301 | 69     | 8.9   |
| Gruiformes      | Eurypygidae   | <i>Eurypyga</i>     | <i>helias</i>           | 3.98 | 3.04E-08 | 0.062 | 0.031 | 21     | 56.7  |
| Gruiformes      | Gruidae       | <i>Anthropoides</i> | <i>virgo</i>            | 2.89 | 1.04E-05 | 0.039 | 0.053 | 83     | 40.7  |
| Gruiformes      | Gruidae       | <i>Balearica</i>    | <i>pavonina</i>         | 2.44 | 2.10E-05 | 0.034 | 0.044 | 46     | 39.9  |
| Gruiformes      | Gruidae       | <i>Balearica</i>    | <i>regulorum</i>        | 3.24 | 2.91E-06 | 0.038 | 0.050 | 82     | 48.9  |
| Gruiformes      | Gruidae       | <i>Grus</i>         | <i>antigone</i>         | 2.06 | 1.52E-04 | 0.031 | 0.056 | 51     | 41.8  |
| Gruiformes      | Gruidae       | <i>Grus</i>         | <i>canadensis</i>       | 2.30 | 1.21E-04 | 0.059 | 0.065 | 60     | 31.5  |
| Gruiformes      | Gruidae       | <i>Grus</i>         | <i>grus</i>             | 2.29 | 2.85E-05 | 0.049 | 0.041 | 50     | 43.2  |
| Gruiformes      | Gruidae       | <i>Grus</i>         | <i>vipio</i>            | 4.06 | 1.78E-06 | 0.059 | 0.073 | 12     | 56.3  |
| Gruiformes      | Rallidae      | <i>Fulica</i>       | <i>atra</i>             | 5.02 | 6.50E-06 | 0.116 | 0.137 | 22     | 14.7  |
| Musophagiformes | Musophaginae  | <i>Musophaga</i>    | <i>violacea</i>         | 1.78 | 4.57E-03 | 0.019 | 0.144 | 31     | 17.9  |
| Musophagiformes | Musophaginae  | <i>Tauraco</i>      | <i>corythaix</i>        | 2.26 | 1.98E-04 | 0.094 | 0.073 | 50     | 23.6  |
| Passeriformes   | Bombycillidae | <i>Bombycilla</i>   | <i>cedrorum</i>         | 2.27 | 7.62E-03 | 0.030 | 0.225 | 60     | 12.6  |
| Passeriformes   | Corvidae      | <i>Corvus</i>       | <i>brachyrhynchos</i>   | 3.10 | 1.73E-04 | 0.062 | 0.121 | 26     | 40.6  |
| Passeriformes   | Corvidae      | <i>Corvus</i>       | <i>corax</i>            | 2.72 | 2.60E-05 | 0.022 | 0.059 | 12     | 30.2  |
| Passeriformes   | Fringillidae  | <i>Cyanerpes</i>    | <i>cyaneus</i>          | 2.50 | 3.24E-04 | 0.226 | 0.101 | 130    | 18.2  |
| Passeriformes   | Fringillidae  | <i>Ramphocelus</i>  | <i>carbo</i>            | 3.15 | 1.48E-04 | 0.126 | 0.119 | 24     | 16.6  |
| Passeriformes   | Fringillidae  | <i>Thraupis</i>     | <i>episcopus</i>        | 0.01 | 1.89E-01 | 0.001 | 0.192 | 57     | 19.1  |
| Passeriformes   | Irenidae      | <i>Irena</i>        | <i>puella</i>           | 2.86 | 1.34E-04 | 0.194 | 0.099 | 178    | 17.4  |
| Passeriformes   | Muscicapidae  | <i>Leiothrix</i>    | <i>argenteauris</i>     | 5.74 | 6.98E-07 | 0.231 | 0.122 | 75     | 12.2  |

|                |              |                      |                      |      |          |       |       |     |      |
|----------------|--------------|----------------------|----------------------|------|----------|-------|-------|-----|------|
| Passeriformes  | Muscicapidae | <i>Leiothrix</i>     | <i>lutea</i>         | 3.21 | 3.75E-04 | 0.142 | 0.154 | 153 | 18.9 |
| Passeriformes  | Passeridae   | <i>Amadina</i>       | <i>fasciata</i>      | 3.20 | 2.10E-04 | 0.298 | 0.133 | 77  | 10.8 |
| Passeriformes  | Passeridae   | <i>Amandava</i>      | <i>amandava</i>      | 1.43 | 2.60E-02 | 0.094 | 0.223 | 81  | 12.4 |
| Passeriformes  | Passeridae   | <i>Carduelis</i>     | <i>carduelis</i>     | 2.14 | 1.77E-02 | 0.351 | 0.277 | 63  | 6.3  |
| Passeriformes  | Passeridae   | <i>Chloebia</i>      | <i>gouldiae</i>      | 2.87 | 9.51E-04 | 0.212 | 0.166 | 64  | 13.6 |
| Passeriformes  | Passeridae   | <i>Emblema</i>       | <i>guttata</i>       | 4.75 | 3.10E-01 | 0.310 | 0.816 | 65  | 8.4  |
| Passeriformes  | Passeridae   | <i>Euplectes</i>     | <i>orix</i>          | 3.01 | 2.72E-05 | 0.102 | 0.073 | 49  | 25.9 |
| Passeriformes  | Passeridae   | <i>Neochmia</i>      | <i>ruficauda</i>     | 6.25 | 2.61E-07 | 0.240 | 0.123 | 74  | 14.3 |
| Passeriformes  | Passeridae   | <i>Padda</i>         | <i>oryzivora</i>     | 1.57 | 1.28E-02 | 0.206 | 0.183 | 84  | 11.9 |
| Passeriformes  | Passeridae   | <i>Ploceus</i>       | <i>cucullatus</i>    | 2.66 | 1.45E-04 | 0.061 | 0.089 | 20  | 25.4 |
| Passeriformes  | Passeridae   | <i>Poephila</i>      | <i>acuticauda</i>    | 2.91 | 1.23E-03 | 0.331 | 0.180 | 124 | 11.1 |
| Passeriformes  | Passeridae   | <i>Poephila</i>      | <i>guttata</i>       | 1.17 | 3.91E-02 | 0.292 | 0.224 | 203 | 12.4 |
| Passeriformes  | Passeridae   | <i>Serinus</i>       | <i>canaria</i>       | 0.86 | 2.86E-01 | 0.081 | 0.511 | 6   | 7.2  |
| Passeriformes  | Passeridae   | <i>Uraeginthus</i>   | <i>cyanocephala</i>  | 6.51 | 6.26E-06 | 0.203 | 0.203 | 24  | 13.4 |
| Passeriformes  | Pycnonotidae | <i>Pycnonotus</i>    | <i>jocosus</i>       | 0.16 | 2.96E-02 | 0.100 | 0.049 | 54  | 25.7 |
| Passeriformes  | Sturnidae    | <i>Cosmopsarus</i>   | <i>regius</i>        | 1.74 | 2.42E-03 | 0.032 | 0.111 | 42  | 19.9 |
| Passeriformes  | Sturnidae    | <i>Gracula</i>       | <i>religiosa</i>     | 2.72 | 1.05E-04 | 0.163 | 0.085 | 167 | 23.6 |
| Passeriformes  | Sturnidae    | <i>Lamprotornis</i>  | <i>iris</i>          | 2.52 | 3.19E-04 | 0.078 | 0.102 | 31  | 19.0 |
| Passeriformes  | Sturnidae    | <i>Leucopsar</i>     | <i>rothschildi</i>   | 2.57 | 1.60E-04 | 0.045 | 0.087 | 100 | 28.3 |
| Passeriformes  | Sturnidae    | <i>Spreo</i>         | <i>superbus</i>      | 2.52 | 1.89E-04 | 0.099 | 0.087 | 65  | 26.3 |
| Passeriformes  | Turdidae     | <i>Copsychus</i>     | <i>malabaricus</i>   | 5.51 | 1.17E-07 | 0.246 | 0.086 | 87  | 14.1 |
| Passeriformes  | Zosteropidae | <i>Zosterops</i>     | <i>palpebrosa</i>    | 2.75 | 3.19E-04 | 0.196 | 0.117 | 42  | 12.7 |
| Piciformes     | Ramphastidae | <i>Ramphastos</i>    | <i>toco</i>          | 3.70 | 1.95E-05 | 0.109 | 0.100 | 148 | 20.8 |
| Psittaciformes | Psittacidae  | <i>Agapornis</i>     | <i>fischeri</i>      | 1.43 | 4.97E-02 | 0.067 | 0.291 | 20  | 7.7  |
| Psittaciformes | Psittacidae  | <i>Agapornis</i>     | <i>personata</i>     | 2.46 | 3.85E-03 | 0.097 | 0.200 | 28  | 14.0 |
| Psittaciformes | Psittacidae  | <i>Agapornis</i>     | <i>roseicollis</i>   | 2.32 | 4.67E-03 | 0.124 | 0.199 | 102 | 27.0 |
| Psittaciformes | Psittacidae  | <i>Amazona</i>       | <i>aestiva</i>       | 2.71 | 2.75E-05 | 0.008 | 0.059 | 11  | 38.1 |
| Psittaciformes | Psittacidae  | <i>Amazona</i>       | <i>ochrocephala</i>  | 1.37 | 1.15E-03 | 0.055 | 0.058 | 27  | 39.0 |
| Psittaciformes | Psittacidae  | <i>Anodorhynchus</i> | <i>hyacinthinus</i>  | 3.92 | 3.39E-07 | 0.024 | 0.048 | 34  | 35.9 |
| Psittaciformes | Psittacidae  | <i>Ara</i>           | <i>ararauna</i>      | 3.28 | 3.96E-06 | 0.025 | 0.055 | 41  | 43.6 |
| Psittaciformes | Psittacidae  | <i>Ara</i>           | <i>chloroptera</i>   | 3.32 | 9.17E-06 | 0.015 | 0.068 | 45  | 36.5 |
| Psittaciformes | Psittacidae  | <i>Ara</i>           | <i>macao</i>         | 2.88 | 9.89E-06 | 0.012 | 0.051 | 35  | 58.7 |
| Psittaciformes | Psittacidae  | <i>Ara</i>           | <i>militaris</i>     | 2.86 | 1.82E-05 | 0.020 | 0.059 | 19  | 58.2 |
| Psittaciformes | Psittacidae  | <i>Aratinga</i>      | <i>solstitialis</i>  | 2.08 | 8.46E-04 | 0.042 | 0.100 | 28  | 20.0 |
| Psittaciformes | Psittacidae  | <i>Cacatua</i>       | <i>galerita</i>      | 3.21 | 2.44E-06 | 0.025 | 0.047 | 31  | 49.7 |
| Psittaciformes | Psittacidae  | <i>Cacatua</i>       | <i>moluccensis</i>   | 1.34 | 1.52E-03 | 0.035 | 0.063 | 62  | 68.0 |
| Psittaciformes | Psittacidae  | <i>Cyanoliseus</i>   | <i>patagonus</i>     | 4.67 | 2.13E-07 | 0.094 | 0.067 | 36  | 23.4 |
| Psittaciformes | Psittacidae  | <i>Eclectus</i>      | <i>roratus</i>       | 1.19 | 2.65E-03 | 0.036 | 0.067 | 58  | 38.1 |
| Psittaciformes | Psittacidae  | <i>Eolophus</i>      | <i>roseicapillus</i> | 4.07 | 2.59E-07 | 0.065 | 0.050 | 41  | 56.3 |
| Psittaciformes | Psittacidae  | <i>Melopsittacus</i> | <i>undulatus</i>     | 1.32 | 9.70E-03 | 0.214 | 0.135 | 58  | 11.0 |

|                  |               |                      |                       |      |          |       |       |    |      |
|------------------|---------------|----------------------|-----------------------|------|----------|-------|-------|----|------|
| Psittaciformes   | Psittacidae   | <i>Myiopsitta</i>    | <i>monachus</i>       | 1.21 | 8.33E-03 | 0.060 | 0.115 | 31 | 21.6 |
| Psittaciformes   | Psittacidae   | <i>Nymphicus</i>     | <i>hollandicus</i>    | 3.02 | 1.03E-04 | 0.126 | 0.102 | 96 | 16.2 |
| Psittaciformes   | Psittacidae   | <i>Psittacula</i>    | <i>krameri</i>        | 3.81 | 4.69E-06 | 0.048 | 0.078 | 31 | 36.6 |
| Psittaciformes   | Psittacidae   | <i>Psittacus</i>     | <i>erithacus</i>      | 2.98 | 5.89E-06 | 0.034 | 0.048 | 37 | 41.9 |
| Psittaciformes   | Psittacidae   | <i>Trichoglossus</i> | <i>haematodus</i>     | 4.43 | 6.03E-07 | 0.084 | 0.071 | 79 | 18.4 |
| Strigiformes     | Podargidae    | <i>Podargus</i>      | <i>strigoides</i>     | 5.00 | 2.71E-08 | 0.093 | 0.055 | 37 | 27.3 |
| Strigiformes     | Strigidae     | <i>Athene</i>        | <i>cunicularia</i>    | 1.55 | 7.35E-03 | 0.016 | 0.145 | 84 | 20.9 |
| Strigiformes     | Strigidae     | <i>Bubo</i>          | <i>bubo</i>           | 2.22 | 1.58E-04 | 0.001 | 0.066 | 26 | 42.8 |
| Strigiformes     | Strigidae     | <i>Bubo</i>          | <i>virginianus</i>    | 3.98 | 3.89E-07 | 0.010 | 0.052 | 17 | 38.2 |
| Strigiformes     | Strigidae     | <i>Nyctea</i>        | <i>scandiaca</i>      | 3.20 | 9.69E-06 | 0.041 | 0.064 | 61 | 43.7 |
| Strigiformes     | Strigidae     | <i>Otus</i>          | <i>asio</i>           | 2.74 | 2.97E-04 | 0.087 | 0.114 | 66 | 21.6 |
| Strigiformes     | Strigidae     | <i>Pulsatrix</i>     | <i>perspicillata</i>  | 1.24 | 3.54E-03 | 0.022 | 0.081 | 19 | 23.7 |
| Strigiformes     | Strigidae     | <i>Strix</i>         | <i>varia</i>          | 4.89 | 6.53E-07 | 0.065 | 0.089 | 13 | 28.4 |
| Strigiformes     | Tytonidae     | <i>Tyto</i>          | <i>alba</i>           | 3.29 | 3.13E-05 | 0.083 | 0.089 | 46 | 22.8 |
| Struthioniformes | Apterygidae   | <i>Apteryx</i>       | <i>australis</i>      | 4.17 | 2.65E-06 | 0.054 | 0.083 | 25 | 20.3 |
| Struthioniformes | Casuaridae    | <i>Dromaius</i>      | <i>novaeollandiae</i> | 2.10 | 6.29E-05 | 0.042 | 0.044 | 37 | 37.3 |
| Struthioniformes | Rheidae       | <i>Rhea</i>          | <i>americana</i>      | 1.93 | 5.93E-04 | 0.070 | 0.079 | 87 | 37.4 |
| Struthioniformes | Struthionidae | <i>Struthio</i>      | <i>camelus</i>        | 2.67 | 6.56E-05 | 0.063 | 0.072 | 99 | 29.6 |

## Reptiles and amphibians

The orders Caudata and Anura are amphibians. All data are from captive populations.

| Order    | Family         | Genus                | Species                    | <i>b</i> | <i>a</i> | <i>m</i> <sub>0</sub> | $\omega$ | <i>n</i> | oldest |
|----------|----------------|----------------------|----------------------------|----------|----------|-----------------------|----------|----------|--------|
| Squamata | Agamidae       | <i>Pogona</i>        | <i>vitticeps</i>           | 1.14     | 5.35E-02 | 0.027                 | 0.254    | 97       | 11.11  |
| Squamata | Anguillidae    | <i>Ophisaurus</i>    | <i>apodus</i>              | 3.24     | 4.20E-05 | 0.019                 | 0.093    | 18       | 25.52  |
| Squamata | Boidae         | <i>Boa</i>           | <i>constrictor</i>         | 4.06     | 1.14E-06 | 0.020                 | 0.067    | 66       | 25.68  |
| Squamata | Boidae         | <i>Chondropython</i> | <i>viridis</i>             | 4.04     | 4.24E-06 | 0.089                 | 0.086    | 92       | 21.09  |
| Squamata | Boidae         | <i>Eunectes</i>      | <i>murinus</i>             | 3.37     | 1.67E-05 | 0.020                 | 0.081    | 22       | 26.77  |
| Squamata | Boidae         | <i>Python</i>        | <i>reticulatus</i>         | 2.32     | 2.87E-04 | 0.020                 | 0.086    | 45       | 35.90  |
| Squamata | Boidae         | <i>Python</i>        | <i>regius</i>              | 3.64     | 8.27E-06 | 0.000                 | 0.080    | 19       | 50.02  |
| Squamata | Boidae         | <i>Python</i>        | <i>molurus bivittatus</i>  | 2.10     | 2.00E-04 | 0.003                 | 0.064    | 14       | 32.03  |
| Squamata | Boidae         | <i>Sanzinia</i>      | <i>madagascariensis</i>    | 4.76     | 4.92E-07 | 0.083                 | 0.080    | 33       | 24.58  |
| Squamata | Chamaeleonidae | <i>Chamaeleo</i>     | <i>calyptratus</i>         | 6.84     | 3.63E-05 | 0.435                 | 0.272    | 49       | 5.19   |
| Squamata | Colubridae     | <i>Elaphe</i>        | <i>guttata</i>             | 3.67     | 2.73E-06 | 0.065                 | 0.065    | 25       | 26.04  |
| Squamata | Colubridae     | <i>Lampropeltis</i>  | <i>getulus californiae</i> | 6.38     | 8.92E-09 | 0.069                 | 0.081    | 31       | 23.48  |
| Squamata | Gekkonidae     | <i>Eublepharis</i>   | <i>macularius</i>          | 2.99     | 6.30E-05 | 0.024                 | 0.089    | 36       | 25.33  |
| Squamata | Gekkonidae     | <i>Phelsuma</i>      | <i>standingi</i>           | 3.44     | 7.40E-04 | 0.259                 | 0.197    | 30       | 12.48  |
| Squamata | Helodermatidae | <i>Heloderma</i>     | <i>suspectum suspectum</i> | 3.56     | 9.61E-06 | 0.012                 | 0.079    | 21       | 24.18  |



|            |                 |                      |                            |      |          |       |       |     |         |
|------------|-----------------|----------------------|----------------------------|------|----------|-------|-------|-----|---------|
| Squamata   | Helodermatidae  | <i>Heloderma</i>     | <i>suspectum</i>           | 2.39 | 1.11E-04 | 0.013 | 0.068 | 28  | 29.61   |
| Squamata   | Iguanidae       | <i>Iguana</i>        | <i>iguana</i>              | 1.29 | 8.06E-04 | 0.156 | 0.044 |     | 57.83   |
| Squamata   | Scincidae       | <i>Corucia</i>       | <i>zebrata</i>             | 4.50 | 2.51E-06 | 0.101 | 0.096 | 43  | 16.47   |
| Squamata   | Viperidae       | <i>Bitis</i>         | <i>gabonica rhinoceros</i> | 2.01 | 1.99E-03 | 0.005 | 0.126 | 65  | 18.32   |
| Squamata   | Viperidae       | <i>Crotalus</i>      | <i>atrox</i>               | 3.50 | 1.16E-05 | 0.014 | 0.080 | 25  | 26.87   |
| Squamata   | Xenosauridae    | <i>Shinisaurus</i>   | <i>crocodilurus</i>        | 1.92 | 6.60E-03 | 0.041 | 0.180 | 55  | 16.14   |
| Crocodylia | Crocodylidae    | <i>Alligator</i>     | <i>sinensis</i>            | 3.48 | 1.43E-04 | 0.025 | 0.139 | 15  | 46.81   |
| Crocodylia | Crocodylidae    | <i>Alligator</i>     | <i>mississippiensis</i>    | 3.74 | 4.93E-07 | 0.019 | 0.047 | 30  | 77.84   |
| Crocodylia | Crocodylidae    | <i>Crocodylus</i>    | <i>niloticus</i>           | 3.95 | 8.67E-07 | 0.012 | 0.060 | 15  | 39.12   |
| Crocodylia | Crocodylidae    | <i>Paleosuchus</i>   | <i>palpebrosus</i>         | 2.06 | 2.71E-03 | 0.017 | 0.145 | 16  | 21.58   |
| Chelonia   | Chelidae        | <i>Chelus</i>        | <i>fimbriatus</i>          | 2.55 | 1.70E-04 | 0.128 | 0.086 | 45  | 35.60   |
| Chelonia   | Chelydridae     | <i>Chelydra</i>      | <i>serpentina</i>          | 3.57 | 1.83E-05 | 0.047 | 0.092 | 18  | 14.79   |
| Chelonia   | Emydidae        | <i>Terrapene</i>     | <i>carolina triunguis</i>  | 4.04 | 6.54E-06 | 0.026 | 0.094 | 11  | 23.53   |
| Chelonia   | Emydidae        | <i>Trachemys</i>     | <i>scripta elegans</i>     | 3.64 | 1.13E-05 | 0.062 | 0.086 | 37  | 47.42   |
| Chelonia   | Pelomedusidae   | <i>Podocnemis</i>    | <i>unifilis</i>            | 4.37 | 2.58E-07 | 0.032 | 0.059 | 25  | 32.91   |
| Chelonia   | Testudinidae    | <i>Geochelone</i>    | <i>elephantopus</i>        | 1.30 | 5.90E-03 | 0.000 | 0.107 | 24  | 81.52   |
| Chelonia   | Testudinidae    | <i>Geochelone</i>    | <i>carbonaria</i>          | 4.15 | 5.49E-06 | 0.048 | 0.095 | 36  | 30.21   |
| Chelonia   | Testudinidae    | <i>Geochelone</i>    | <i>elegans</i>             | 4.41 | 1.73E-06 | 0.036 | 0.086 | 21  | 24.34   |
| Chelonia   | Testudinidae    | <i>Geochelone</i>    | <i>pardalis</i>            | 1.16 | 2.55E-03 | 0.031 | 0.063 | 35  | 28.52   |
| Chelonia   | Testudinidae    | <i>Geochelone</i>    | <i>gigantea</i>            | 0.97 | 1.40E-03 | 0.000 | 0.036 | 12  | 96.53   |
| Chelonia   | Testudinidae    | <i>Gopherus</i>      | <i>agassizii</i>           | 2.02 | 3.72E-04 | 0.017 | 0.073 | 21  | 50.97   |
| Chelonia   | Testudinidae    | <i>Malacochersus</i> | <i>tornieri</i>            | 1.74 | 1.51E-02 | 0.051 | 0.216 | 63  | 25.90   |
| Chelonia   | Testudinidae    | <i>Testudo</i>       | <i>graeca</i>              | 4.39 | 1.28E-06 | 0.000 | 0.081 | 9   | 45.63   |
| Chelonia   | Testudinidae    | <i>Testudo</i>       | <i>hermanni</i>            | 2.90 | 4.03E-05 | 0.023 | 0.074 | 11  | 84.73   |
| Caudata    | Ambystomatidae  | <i>Ambystoma</i>     | <i>tigrinum</i>            | 3.12 | 1.77E-04 | 0.105 | 0.123 | 73  | 20.06   |
| Caudata    | Salamandridae   | <i>Salamandra</i>    | <i>Salamandra</i>          | 3.68 | 3.75E-05 | 0.079 | 0.113 | 9   | 13.91   |
| Anura      | Bufo            | <i>Bufo</i>          | <i>baxteri</i>             | 3.12 | 3.51E-02 | 0.103 | 0.443 | 23  | 4.25    |
| Anura      | Dendrobatidae   | <i>Dendrobates</i>   | <i>azureus</i>             | 4.27 | 4.53E-05 | 0.339 | 0.150 | 43  | 11.65   |
| Anura      | Dendrobatidae   | <i>Dendrobates</i>   | <i>tinctorius</i>          | 4.71 | 1.09E-05 | 0.182 | 0.135 | 52  | 10.75   |
| Anura      | Dendrobatidae   | <i>Dendrobates</i>   | <i>auratus</i>             | 3.48 | 2.76E-05 | 0.175 | 0.096 | 56  | 16.84   |
| Anura      | Hylidae         | <i>Agalychnis</i>    | <i>callidryas</i>          | 1.05 | 1.07E-01 | 0.325 | 0.337 | 132 | 7.95    |
| Anura      | Hylidae         | <i>Litoria</i>       | <i>caerulea</i>            | 1.59 | 9.55E-03 | 0.011 | 0.166 | 107 | 18.22   |
| Anura      | Leptodactylidae | <i>Leptodactylus</i> | <i>pentadactylus</i>       | 2.95 | 1.12E-03 | 0.018 | 0.179 | 19  | 18.6438 |
| Anura      | Microhylidae    | <i>Dyscophus</i>     | <i>antongilii</i>          | 0.37 | 2.67E-01 | 0.014 | 0.383 | 146 | 9.68493 |
| Anura      | Pipidae         | <i>Pipa</i>          | <i>pipa</i>                | 1.03 | 8.77E-02 | 0.093 | 0.301 | 85  | 15.76   |
| Anura      | Ranidae         | <i>Rana</i>          | <i>catesbeiana</i>         | 3.91 | 3.74E-04 | 0.138 | 0.200 | 41  | 8.75    |

APPENDIX 5. The rate of aging ( $\omega$ ) is strongly correlated with maximum recorded life span.

The data for animals in captive populations analyzed in this study included the age of the oldest individual recorded, which was highly correlated with the estimated rate of actuarial aging ( $r = -0.831$ ,  $n = 150$ ,  $P < 0.0001$ ). This was marginally dependent ( $P = 0.025$ ) on the number of individuals used in the analysis of omega, which varied from 13 to 1664. The regression relating the log-transformed oldest recorded age to the rate of aging was  $\log_{10}(\text{oldest}) = 0.522 (\pm 0.048 \text{ SE}) - 0.831 (\pm 0.046 \text{ SE}, t = -23.4, P < 0.0001) \log_{10}(\omega) + 0.057 (\pm 0.025 \text{ SE}, t = 2.3, P = 0.025) \log_{10}(n)$  ( $F_{2,169} = 274$ ,  $P < 0.0001$ ,  $R^2 = 0.764$ ) (some species were represented by more than 1 value).

A similar regression of the maximum recorded longevity in the AnAge database (7) on the species average for omega estimated in this study was:  $\log_{10}(\text{oldest}) = 0.602 (\pm 0.035 \text{ SE}) - 0.779 (\pm 0.033 \text{ SE}) \log_{10}(\omega)$  ( $F_{1,160} = 542$ ,  $P < 0.0001$ ,  $R^2 = 0.772$ ). Thus,  $\omega$  and maximum recorded life span can be used interchangeably in analyses of the rate of aging and potential longevity.

APPENDIX 6. Life history variables for the species used in this analysis. Data are from the AnAge database and references therein.

## Mammals

| Order        | Family         | Genus               | Species               | Age at maturity (d) |        | Mass (g) |         |           | Period (d) |           | Growth rate | Oldest (y) |
|--------------|----------------|---------------------|-----------------------|---------------------|--------|----------|---------|-----------|------------|-----------|-------------|------------|
|              |                |                     |                       | Females             | Adult  | Neonate  | Weaning | Gestation | Weaning    | $k$ (1/d) |             |            |
| Artiodactyla | Antilocapridae | <i>Antilocapra</i>  | <i>americana</i>      | 547                 | 46100  | 3000     | 8900    | 235       | 91         | 0.0083    | 15.5        |            |
| Artiodactyla | Bovidae        | <i>Addax</i>        | <i>nasomaculatus</i>  | 1065                | 92500  | 5600     | .       | 282       | 198        | .         | 28          |            |
| Artiodactyla | Bovidae        | <i>Aepyceros</i>    | <i>melampus</i>       | 456                 | 52500  | 5550     | 15900   | 198       | 167        | 0.0043    | 25.6        |            |
| Artiodactyla | Bovidae        | <i>Ammotragus</i>   | <i>lervia</i>         | 335                 | 92500  | 4500     | .       | 149       | 122        | 0.0053    | 21.7        |            |
| Artiodactyla | Bovidae        | <i>Antelope</i>     | <i>cervicapra</i>     | 466                 | 37500  | 3850     | .       | 168       | 60         | .         | 23.9        |            |
| Artiodactyla | Bovidae        | <i>Bison</i>        | <i>bison</i>          | 912                 | 630000 | 20000    | 158000  | 274       | 259        | .         | 33.5        |            |
| Artiodactyla | Bovidae        | <i>Bos</i>          | <i>frontalis</i>      | 590                 | 825000 | 23000    | .       | 275       | 137        | .         | 26.2        |            |
| Artiodactyla | Bovidae        | <i>Bos</i>          | <i>grunniens</i>      | 738                 | 667000 | 18000    | .       | 274       | 228        | .         | 26.3        |            |
| Artiodactyla | Bovidae        | <i>Bos</i>          | <i>javanicus</i>      | 730                 | 700000 | .        | .       | 295       | 304        | .         | 27.1        |            |
| Artiodactyla | Bovidae        | <i>Bos</i>          | <i>taurus</i>         | 548                 | 750000 | .        | .       | 277       | .          | 0.0031    | .           |            |
| Artiodactyla | Bovidae        | <i>Bubalus</i>      | <i>bubalis</i>        | 502                 | 725000 | 37500    | .       | 311       | 228        | .         | 34.9        |            |
| Artiodactyla | Bovidae        | <i>Capra</i>        | <i>falconeri</i>      | 745                 | 41000  | .        | .       | 163       | 167        | .         | 19.1        |            |
| Artiodactyla | Bovidae        | <i>Capra</i>        | <i>hircus</i>         | 406                 | 61000  | 2250     | .       | 155       | 160        | 0.0041    | 20.8        |            |
| Artiodactyla | Bovidae        | <i>Capra</i>        | <i>ibex</i>           | 797                 | 82500  | 2850     | .       | 169       | 274        | 0.005     | 20.9        |            |
| Artiodactyla | Bovidae        | <i>Connochaetes</i> | <i>taurinus</i>       | 411                 | 164500 | 18125    | .       | 253       | 278        | 0.0026    | 24.3        |            |
| Artiodactyla | Bovidae        | <i>Damaliscus</i>   | <i>lunatus</i>        | 639                 | 110000 | 11100    | .       | 238       | .          | .         | 23.6        |            |
| Artiodactyla | Bovidae        | <i>Damaliscus</i>   | <i>pygargus</i>       | 707                 | 84500  | 6792     | .       | 243       | 152        | 0.0056    | 23          |            |
| Artiodactyla | Bovidae        | <i>Gazella</i>      | <i>gazella</i>        | 476                 | 23250  | 2360     | .       | 180       | 88         | .         | 18.3        |            |
| Artiodactyla | Bovidae        | <i>Gazella</i>      | <i>granti</i>         | 251                 | 67000  | 5602.5   | .       | 196       | .          | .         | 19.7        |            |
| Artiodactyla | Bovidae        | <i>Gazella</i>      | <i>subgutturosa</i>   | 646                 | 48500  | 2625     | 13500   | 175       | 106        | .         | 16.3        |            |
| Artiodactyla | Bovidae        | <i>Gazella</i>      | <i>thomsonii</i>      | 365                 | 25000  | 2600     | .       | 170       | 102        | .         | 20          |            |
| Artiodactyla | Bovidae        | <i>Hemitragus</i>   | <i>jemlahicus</i>     | 547                 | 35200  | 2000     | .       | 183       | 151        | .         | 21.8        |            |
| Artiodactyla | Bovidae        | <i>Hippotragus</i>  | <i>equinus</i>        | 730                 | 225000 | 15167    | .       | 284       | 183        | .         | 25.9        |            |
| Artiodactyla | Bovidae        | <i>Hippotragus</i>  | <i>niger</i>          | 768                 | 225000 | 16375    | .       | 271       | 213        | .         | 22.2        |            |
| Artiodactyla | Bovidae        | <i>Kobus</i>        | <i>ellipsiprymnus</i> | 771                 | 175333 | 9000     | .       | 264       | 213        | .         | 30          |            |
| Artiodactyla | Bovidae        | <i>Kobus</i>        | <i>kob</i>            | 403                 | 105000 | 5405     | 31600   | 251       | 189        | .         | 21.9        |            |
| Artiodactyla | Bovidae        | <i>Kobus</i>        | <i>leche</i>          | 898                 | 94800  | 5100     | .       | 229       | 137        | .         | 25.4        |            |
| Artiodactyla | Bovidae        | <i>Kobus</i>        | <i>megaceros</i>      | 730                 | 90000  | 5100     | .       | 235       | .          | .         | 21.1        |            |
| Artiodactyla | Bovidae        | <i>Oreamnos</i>     | <i>americanus</i>     | 912                 | 90000  | 3200     | .       | 184       | 122        | .         | 20.8        |            |
| Artiodactyla | Bovidae        | <i>Oryx</i>         | <i>dammah</i>         | 639                 | 177500 | 10317    | .       | 247       | .          | .         | 27.5        |            |
| Artiodactyla | Bovidae        | <i>Oryx</i>         | <i>leucoryx</i>       | 794                 | 121350 | .        | .       | 243       | 137        | .         | 20.8        |            |
| Artiodactyla | Bovidae        | <i>Ovis</i>         | <i>aries</i>          | 548                 | 110000 | 2370     | 17500   | 146       | 182        | .         | 22.8        |            |
| Artiodactyla | Bovidae        | <i>Ovis</i>         | <i>canadensis</i>     | 707                 | 70275  | 4400     | 28000   | 180       | 152        | 0.0031    | 20.6        |            |
| Artiodactyla | Bovidae        | <i>Ovis</i>         | <i>dalli</i>          | 684                 | 73100  | 2819     | .       | 173       | 129        | .         | 19.6        |            |
| Artiodactyla | Bovidae        | <i>Rupicapra</i>    | <i>pyrenaica</i>      | .                   | 30000  | .        | .       | .         | .          | .         | .           |            |

|              |                |                     |                       |      |          |       |        |     |     |        |      |
|--------------|----------------|---------------------|-----------------------|------|----------|-------|--------|-----|-----|--------|------|
| Artiodactyla | Bovidae        | <i>Rupicapra</i>    | <i>rupicapra</i>      | 674  | 37500    | 2400  | .      | 122 | 76  | .      | 17.6 |
| Artiodactyla | Bovidae        | <i>Syncerus</i>     | <i>caffer</i>         | 1475 | 700000   | 44000 | 166000 | 331 | 289 | 0.0026 | 29.8 |
| Artiodactyla | Camelidae      | <i>Camelus</i>      | <i>bactrianus</i>     | 1278 | 475000   | 36000 | .      | 395 | 319 | .      | 35.4 |
| Artiodactyla | Camelidae      | <i>Camelus</i>      | <i>dromedarius</i>    | 1095 | 434000   | 37000 | 253484 | 405 | 500 | .      | 28.4 |
| Artiodactyla | Camelidae      | <i>Lama</i>         | <i>glama</i>          | 800  | 140000   | 11000 | .      | 330 | 152 | .      | 28.9 |
| Artiodactyla | Camelidae      | <i>Lama</i>         | <i>guanicoe</i>       | 365  | 127500   | 11500 | .      | 335 | 345 | .      | 33.7 |
| Artiodactyla | Cervidae       | <i>Alces</i>        | <i>alces</i>          | 751  | 386000   | 12844 | 94000  | 243 | 100 | 0.0039 | .    |
| Artiodactyla | Cervidae       | <i>Axis</i>         | <i>axis</i>           | 766  | 36000    | 3144  | .      | 226 | 122 | .      | 20.8 |
| Artiodactyla | Cervidae       | <i>Capreolus</i>    | <i>capreolus</i>      | 413  | 21666.7  | 1010  | 8692.5 | 153 | 89  | .      | 17.5 |
| Artiodactyla | Cervidae       | <i>Cervus</i>       | <i>elaphus</i>        | 852  | 200000   | 10100 | 56500  | 245 | 156 | 0.006  | 31.5 |
| Artiodactyla | Cervidae       | <i>Dama</i>         | <i>dama</i>           | 487  | 70000    | 4500  | 22570  | 233 | 183 | .      | 21.1 |
| Artiodactyla | Cervidae       | <i>Odocoileus</i>   | <i>virginianus</i>    | 309  | 87000    | 3000  | 36000  | 198 | 129 | 0.007  | 21.6 |
| Artiodactyla | Cervidae       | <i>Rangifer</i>     | <i>tarandus</i>       | 662  | 101250   | 6500  | 20000  | 228 | 120 | 0.0047 | 21.7 |
| Artiodactyla | Giraffidae     | <i>Giraffa</i>      | <i>camelopardalis</i> | 1278 | 800000   | 58500 | .      | 457 | 152 | .      | 39.5 |
| Artiodactyla | Hippopotamidae | <i>Hippopotamus</i> | <i>amphibius</i>      | 1279 | 3.75E+06 | 40000 | 237500 | 234 | 341 | .      | 61.2 |
| Artiodactyla | Suidae         | <i>Sus</i>          | <i>scrofa</i>         | 334  | 180000   | 960   | 5700   | 115 | 56  | 0.0095 | 27   |
| Carnivora    | Ailuridae      | <i>Ailurus</i>      | <i>fulgens</i>        | 550  | 4325     | 100   | 1140   | 116 | 137 | 0.009  | 19   |
| Carnivora    | Canidae        | <i>Canis</i>        | <i>lupus</i>          | 669  | 26625    | 450   | 5250   | 62  | 47  | 0.0177 | 20.6 |
| Carnivora    | Canidae        | <i>Chrysocyon</i>   | <i>brachyurus</i>     | 730  | 21500    | 368   | .      | 64  | 227 | 0.0116 | 16.8 |
| Carnivora    | Canidae        | <i>Lycaon</i>       | <i>pictus</i>         | 639  | 26500    | 318   | .      | 72  | 91  | .      | 17   |
| Carnivora    | Canidae        | <i>Vulpes</i>       | <i>vulpes</i>         | 304  | 4131.7   | 100   | 1397   | 52  | 48  | 0.0177 | 21.3 |
| Carnivora    | Felidae        | <i>Acinonyx</i>     | <i>jubatus</i>        | 456  | 53500    | 489   | 1940   | 88  | 107 | .      | 20.5 |
| Carnivora    | Felidae        | <i>Felis</i>        | <i>silvestris</i>     | 304  | 5500     | 100   | 643    | 64  | 87  | 0.0113 | 19   |
| Carnivora    | Felidae        | <i>Lynx</i>         | <i>lynx</i>           | 639  | 23000    | 246.5 | 1860   | 66  | 87  | 0.0097 | 23.7 |
| Carnivora    | Felidae        | <i>Panthera</i>     | <i>onca</i>           | 730  | 81150    | 820   | 5033.5 | 99  | 126 | 0.0072 | 28   |
| Carnivora    | Felidae        | <i>Panthera</i>     | <i>pardus</i>         | 937  | 53750    | 550   | 1940   | 97  | 110 | 0.0079 | 27.3 |
| Carnivora    | Felidae        | <i>Panthera</i>     | <i>tigris</i>         | 1268 | 119700   | 1190  | 11003  | 105 | 121 | .      | 26.3 |
| Carnivora    | Felidae        | <i>Panthera</i>     | <i>leo</i>            | 1095 | 175000   | 1300  | 8480   | 109 | 216 | 0.0035 | 27   |
| Carnivora    | Felidae        | <i>Uncia</i>        | <i>uncia</i>          | 730  | 50000    | 475   | 7500   | 96  | 77  | .      | 21.2 |
| Carnivora    | Herpestidae    | <i>Suricata</i>     | <i>suricatta</i>      | 365  | 776      | 29    | 225.5  | 77  | 44  | 0.0161 | 20.6 |
| Carnivora    | Hyaenidae      | <i>Crocuta</i>      | <i>crocuta</i>        | 1095 | 63000    | 1390  | 14500  | 110 | 265 | 0.0056 | 41.1 |
| Carnivora    | Mephitidae     | <i>Mephitis</i>     | <i>mephitis</i>       | 335  | 3500     | 33.5  | 493.5  | 63  | 60  | 0.0143 | 13.9 |
| Carnivora    | Mustelidae     | <i>Lutra</i>        | <i>lutra</i>          | 548  | 6750     | 110.5 | .      | 61  | 55  | .      | 18.2 |
| Carnivora    | Mustelidae     | <i>Martes</i>       | <i>zibellina</i>      | 456  | 1066.7   | 30    | 600    | 30  | 56  | .      | 18.4 |
| Carnivora    | Mustelidae     | <i>Mustela</i>      | <i>erminea</i>        | 95   | 110.3    | 2.3   | 26.6   | 43  | 45  | .      | 12.5 |
| Carnivora    | Mustelidae     | <i>Mustela</i>      | <i>putorius</i>       | 312  | 809      | 9.5   | .      | 42  | 63  | 0.0328 | 11.1 |
| Carnivora    | Otariidae      | <i>Callorhinus</i>  | <i>ursinus</i>        | 1095 | 165500   | 5281  | 12925  | 240 | 107 | 0.0007 | .    |
| Carnivora    | Phocidae       | <i>Mirounga</i>     | <i>leonina</i>        | 1059 | 1.40E+06 | 42500 | 124500 | 220 | 21  | 0.0008 | .    |
| Carnivora    | Phocidae       | <i>Pusa</i>         | <i>hispida</i>        | 1826 | 90000    | 6000  | 14000  | 251 | 53  | .      | 46   |
| Carnivora    | Phocidae       | <i>Phoca</i>        | <i>vitulina</i>       | 1095 | 115000   | 11000 | 23945  | 253 | 30  | 0.0013 | 47.6 |
| Carnivora    | Procyonidae    | <i>Nasua</i>        | <i>nasua</i>          | 730  | 4750     | 140   | 730    | 73  | 86  | .      | 23.7 |
| Carnivora    | Procyonidae    | <i>Potos</i>        | <i>flavus</i>         | 820  | 3000     | 175   | .      | 115 | 119 | 0.0102 | 38.4 |
| Carnivora    | Procyonidae    | <i>Procyon</i>      | <i>lotor</i>          | 365  | 6000     | 80    | 1175   | 63  | 91  | 0.0153 | 21   |

|                 |                  |                       |                      |      |        |        |        |     |     |        |      |
|-----------------|------------------|-----------------------|----------------------|------|--------|--------|--------|-----|-----|--------|------|
| Carnivora       | Ursidae          | <i>Ursus</i>          | <i>americanus</i>    | 1278 | 154250 | 277.5  | 14050  | 70  | 198 | 0.0029 | 34   |
| Carnivora       | Ursidae          | <i>Ursus</i>          | <i>arctos</i>        | 1313 | 277500 | 510    | 26000  | 103 | 213 | .      | 40   |
| Cetacea         | Delphinidae      | <i>Tursiops</i>       | <i>truncatus</i>     | 2831 | 200000 | 19350  | .      | 365 | 548 | .      | 51.6 |
| Chiroptera      | Phyllostomidae   | <i>Carollia</i>       | <i>perspicillata</i> | 258  | 17.8   | 5      | 12.5   | 95  | .   | 0.0347 | 17   |
| Chiroptera      | Phyllostomidae   | <i>Desmodus</i>       | <i>rotundus</i>      | 285  | 33.2   | 8      | .      | 189 | 274 | 0.0294 | 29.2 |
| Chiroptera      | Pteropodidae     | <i>Pteropus</i>       | <i>rodricensis</i>   | .    | 350    | 45     | .      | 198 | .   | .      | 28   |
| Chiroptera      | Pteropodidae     | <i>Rousettus</i>      | <i>egyptiacus</i>    | 365  | 125    | 21.06  | 73.8   | 116 | 122 | 0.0149 | 22.9 |
| Chiroptera      | Vespertilionidae | <i>Pipistrellus</i>   | <i>pipistrellus</i>  | 456  | 5      | 1.125  | .      | 42  | 42  | 0.0668 | 16   |
| Cingulata       | Dasyopodidae     | <i>Dasypus</i>        | <i>novemcinctus</i>  | 365  | 5500   | 66     | .      | 133 | 137 | .      | 22.3 |
| Didelphimorphia | Didelphidae      | <i>Didelphis</i>      | <i>virginiana</i>    | 184  | 3000   | 0.147  | 142.5  | 12  | 102 | 0.0129 | 6.6  |
| Diprotodontia   | Acrobatidae      | <i>Acrobates</i>      | <i>pygmaeus</i>      | 240  | 13     | 0.0178 | 5.65   | .   | 99  | 0.0254 | 8.8  |
| Diprotodontia   | Macropodidae     | <i>Macropus</i>       | <i>rufus</i>         | 517  | 55000  | 0.784  | 5000   | 33  | 360 | 0.0075 | 25   |
| Diprotodontia   | Phascolarctidae  | <i>Phascolarctos</i>  | <i>cinereus</i>      | 646  | 9300   | 0.36   | 1155   | 31  | 342 | 0.0028 | 22.1 |
| Erinaceomorpha  | Erinaceidae      | <i>Atelerix</i>       | <i>albiventris</i>   | 84   | 600    | 10     | .      | 35  | 44  | 0.039  | 11.4 |
| Lagomorpha      | Leporidae        | <i>Oryctolagus</i>    | <i>cuniculus</i>     | 730  | 1800   | 45     | 214    | 30  | 26  | 0.0228 | .    |
| Lagomorpha      | Leporidae        | <i>Sylvilagus</i>     | <i>floridanus</i>    | 123  | 1150   | 40     | 118.5  | 30  | 24  | 0.0243 | 9.8  |
| Perissodactyla  | Equidae          | <i>Equus</i>          | <i>burchellii</i>    | 900  | 280000 | 32000  | 205000 | 365 | 395 | 0.0038 | 38   |
| Perissodactyla  | Equidae          | <i>Equus</i>          | <i>caballus</i>      | 914  | 250000 | 79200  | .      | 337 | 274 | .      | 57   |
| Perissodactyla  | Equidae          | <i>Equus</i>          | <i>asinus</i>        | 708  | 164998 | 30000  | .      | 359 | .   | .      | 47   |
| Pilosa          | Megalonychidae   | <i>Choloepus</i>      | <i>didactylus</i>    | 1279 | 6250   | 356    | .      | 279 | 152 | 0.002  | 36.8 |
| Primates        | Callitrichidae   | <i>Callimico</i>      | <i>goeldii</i>       | 365  | 555    | 48.15  | 215    | 153 | 77  | 0.0097 | 22.2 |
| Primates        | Callitrichidae   | <i>Callithrix</i>     | <i>geoffroyi</i>     | .    | 342    | .      | .      | .   | .   | .      | 17.6 |
| Primates        | Callitrichidae   | <i>Callithrix</i>     | <i>jacchus</i>       | 477  | 255.2  | 26.5   | 86.67  | 144 | 62  | 0.0172 | 16.5 |
| Primates        | Callitrichidae   | <i>Callithrix</i>     | <i>penicillata</i>   | .    | 307    | .      | .      | .   | .   | .      | 15.4 |
| Primates        | Callitrichidae   | <i>Callithrix</i>     | <i>pygmaea</i>       | 684  | 124    | 16     | 70     | 125 | 91  | .      | 18.6 |
| Primates        | Callitrichidae   | <i>Leontopithecus</i> | <i>rosalia</i>       | 547  | 654.5  | 55.3   | 165    | 128 | 131 | 0.0077 | 31.6 |
| Primates        | Callitrichidae   | <i>Saguinus</i>       | <i>imperator</i>     | 546  | 518.5  | 47     | .      | 145 | .   | .      | 23.7 |
| Primates        | Callitrichidae   | <i>Saguinus</i>       | <i>midas</i>         | 608  | 553.8  | 40     | .      | 127 | 71  | .      | 21   |
| Primates        | Callitrichidae   | <i>Saguinus</i>       | <i>oedipus</i>       | 548  | 445.5  | 39.36  | 105    | 178 | 52  | 0.0102 | 26.2 |
| Primates        | Cebidae          | <i>Alouatta</i>       | <i>caraya</i>        | 1167 | 5462.5 | 187.5  | .      | 187 | 195 | .      | 32.4 |
| Primates        | Cebidae          | <i>Ateles</i>         | <i>fusciceps</i>     | 1515 | 7000   | 400    | .      | 227 | 410 | .      | 46   |
| Primates        | Cebidae          | <i>Ateles</i>         | <i>geoffroyi</i>     | 1825 | 7267.5 | 426    | 2000   | 232 | 821 | .      | 47.1 |
| Primates        | Cebidae          | <i>Cebus</i>          | <i>apella</i>        | 1703 | 2642.5 | 239.7  | 1000   | 158 | 307 | .      | 46   |
| Primates        | Cebidae          | <i>Cebus</i>          | <i>capucinus</i>     | 1505 | 2655   | 230    | 1350   | 162 | 521 | .      | 54   |
| Primates        | Cebidae          | <i>Saimiri</i>        | <i>boliviensis</i>   | .    | 615    | .      | .      | .   | .   | .      | 30.3 |
| Primates        | Cebidae          | <i>Saimiri</i>        | <i>sciureus</i>      | 1003 | 925    | 107    | 403    | 161 | 177 | 0.0125 | 30.2 |
| Primates        | Cercopithecidae  | <i>Cercocebus</i>     | <i>torquatus</i>     | 973  | 9492.5 | .      | .      | 167 | .   | .      | 46   |
| Primates        | Cercopithecidae  | <i>Cercopithecus</i>  | <i>diana</i>         | 1962 | 4550   | 475    | .      | .   | 365 | .      | 35.1 |
| Primates        | Cercopithecidae  | <i>Cercopithecus</i>  | <i>neglectus</i>     | 1611 | 5945   | 260    | 1640   | 177 | 395 | .      | 30.8 |
| Primates        | Cercopithecidae  | <i>Erythrocebus</i>   | <i>patas</i>         | 956  | 7750   | 504.5  | 1950   | 167 | 162 | .      | 28.3 |
| Primates        | Cercopithecidae  | <i>Macaca</i>         | <i>fascicularis</i>  | 1238 | 6362.5 | 320    | 848.4  | 165 | 242 | .      | 39   |
| Primates        | Cercopithecidae  | <i>Macaca</i>         | <i>fuscata</i>       | 1483 | 8882.5 | 496    | 1767   | 174 | 366 | .      | 38.5 |
| Primates        | Cercopithecidae  | <i>Macaca</i>         | <i>mulatta</i>       | 1231 | 8235   | 464    | 1454   | 165 | 292 | 0.0012 | 40   |

|             |                 |                       |                     |      |          |        |        |     |      |        |       |
|-------------|-----------------|-----------------------|---------------------|------|----------|--------|--------|-----|------|--------|-------|
| Primates    | Cercopithecidae | <i>Macaca</i>         | <i>nemestrina</i>   | 1125 | 7912.5   | 462.5  | 1416.5 | 172 | 324  | 0.0015 | 37.6  |
| Primates    | Cercopithecidae | <i>Macaca</i>         | <i>nigra</i>        | 1490 | 7965     | 461    | .      | 176 | 365  | .      | 34    |
| Primates    | Cercopithecidae | <i>Macaca</i>         | <i>silenus</i>      | 1429 | 7875     | 407    | .      | 176 | 365  | .      | 40    |
| Primates    | Cercopithecidae | <i>Macaca</i>         | <i>sylvanus</i>     | 1399 | 10875    | 450    | 2420   | 164 | 213  | .      | 29.1  |
| Primates    | Cercopithecidae | <i>Mandrillus</i>     | <i>sphinx</i>       | 1186 | 23000    | 613    | 3000   | 173 | 354  | .      | 40    |
| Primates    | Cercopithecidae | <i>Papio</i>          | <i>hamadryas</i>    | 1514 | 18000    | 814    | 3950   | 171 | 300  | 0.0026 | 37.5  |
| Primates    | Cercopithecidae | <i>Theropithecus</i>  | <i>gelada</i>       | 1391 | 16200    | 464    | 3900   | 168 | 433  | .      | 36    |
| Primates    | Cheirogaleidae  | <i>Microcebus</i>     | <i>murinus</i>      | 243  | 64.8     | 6      | .      | 61  | 37   | 0.0362 | 18.2  |
| Primates    | Galagonidae     | <i>Galago</i>         | <i>senegalensis</i> | 240  | 192.2    | 12.2   | 100    | 126 | 89   | 0.0169 | 17.1  |
| Primates    | Hominidae       | <i>Gorilla</i>        | <i>gorilla</i>      | 2829 | 139842   | 2061.4 | 12595  | 256 | 834  | 0.0008 | 53.5  |
| Primates    | Hominidae       | <i>Homo</i>           | <i>sapiens</i>      | 4745 | 62035    | 3312.5 | 11750  | 280 | 639  | 0.0005 | 122.5 |
| Primates    | Hominidae       | <i>Pan</i>            | <i>troglodytes</i>  | 3376 | 44983.5  | 1821   | 8500   | 229 | 1111 | 0.0007 | 74    |
| Primates    | Hominidae       | <i>Pongo</i>          | <i>pygmaeus</i>     | 2555 | 64475    | 1736.5 | 11000  | 249 | 1003 | 0.0009 | 59    |
| Primates    | Hylobatidae     | <i>Hylobates</i>      | <i>lar</i>          | 2555 | 6810     | 307.2  | 1070   | 217 | 600  | 0.002  | 57    |
| Primates    | Hylobatidae     | <i>Hylobates</i>      | <i>syndactylus</i>  | 2190 | 10900    | 517    | .      | 231 | 642  | .      | 43    |
| Primates    | Lemuridae       | <i>Eulemur</i>        | <i>fulvus</i>       | 608  | 3150     | 83.3   | .      | 118 | 153  | .      | 35.5  |
| Primates    | Lemuridae       | <i>Eulemur</i>        | <i>macaco</i>       | 548  | 2500     | 74.67  | .      | 127 | 152  | .      | 36.2  |
| Primates    | Lemuridae       | <i>Eulemur</i>        | <i>mongoz</i>       | 796  | 2060     | 53     | .      | 128 | 154  | .      | 36.2  |
| Primates    | Lemuridae       | <i>Lemur</i>          | <i>catta</i>        | 595  | 2555     | 70.6   | .      | 135 | 152  | .      | 37.3  |
| Primates    | Lemuridae       | <i>Varecia</i>        | <i>variegata</i>    | 604  | 3670     | 87.2   | 2893   | 99  | 112  | .      | 36    |
| Primates    | Loridae         | <i>Nycticebus</i>     | <i>coucang</i>      | 578  | 890.5    | 48.2   | 520    | 188 | 177  | .      | 25.8  |
| Primates    | Pitheciidae     | <i>Pithecia</i>       | <i>pithecia</i>     | 775  | 1480     | .      | .      | 158 | 122  | .      | 36    |
| Proboscidea | Elephantidae    | <i>Elephas</i>        | <i>maximus</i>      | 3287 | 3.18E+06 | 107000 | .      | 644 | 548  | .      | 65.5  |
| Proboscidea | Elephantidae    | <i>Loxodonta</i>      | <i>africana</i>     | 4018 | 4.80E+06 | 105000 | 600000 | 670 | 1071 | 0.0003 | 65    |
| Rodentia    | Agoutidae       | <i>Dasyprocta</i>     | <i>leporina</i>     | 193  | 3265     | .      | .      | 112 | .    | .      | 17.8  |
| Rodentia    | Agoutidae       | <i>Dasyprocta</i>     | <i>punctata</i>     | 487  | 2150     | 227    | .      | 112 | .    | .      | 13.8  |
| Rodentia    | Bathyergidae    | <i>Heterocephalus</i> | <i>glaber</i>       | 228  | 35       | 2      | 11     | 70  | 36   | 0.0046 | 28.3  |
| Rodentia    | Castoridae      | <i>Castor</i>         | <i>canadensis</i>   | 639  | 20250    | 430    | .      | 128 | 60   | .      | 23.4  |
| Rodentia    | Caviidae        | <i>Cavia</i>          | <i>porcellus</i>    | 66   | 728      | 85     | 228    | 68  | 18   | 0.0106 | 12    |
| Rodentia    | Caviidae        | <i>Dolichotis</i>     | <i>patagonum</i>    | 158  | 12500    | 561.94 | .      | 85  | 65   | .      | 14.4  |
| Rodentia    | Chinchillidae   | <i>Chinchilla</i>     | <i>lanigera</i>     | 240  | 642.5    | 35     | .      | 111 | 54   | .      | 17.2  |
| Rodentia    | Erethizontidae  | <i>Erethizon</i>      | <i>dorsatum</i>     | 1095 | 8600     | 500    | 1000   | 210 | 60   | 0.0079 | 23.4  |
| Rodentia    | Hydrochaeridae  | <i>Hydrochaeris</i>   | <i>hydrochaeris</i> | 456  | 55000    | 1500   | 8299   | 150 | 103  | .      | 15.1  |
| Rodentia    | Hystricidae     | <i>Hystrix</i>        | <i>cristata</i>     | .    | 20000    | 1000   | .      | 66  | .    | .      | 28    |
| Rodentia    | Hystricidae     | <i>Hystrix</i>        | <i>indica</i>       | .    | 20000    | .      | .      | 113 | .    | .      | 27.1  |
| Rodentia    | Muridae         | <i>Acomys</i>         | <i>cahirinus</i>    | 58   | 45.2     | 5.27   | 15.16  | 38  | 14   | 0.0147 | 5.9   |
| Rodentia    | Muridae         | <i>Apodemus</i>       | <i>flavicollis</i>  | 52   | 29.4     | 2.4    | 8.7    | 26  | 22   | .      | 4.5   |
| Rodentia    | Muridae         | <i>Clethrionomys</i>  | <i>glareolus</i>    | 47   | 20.8     | 1.82   | 9.8    | 20  | 20   | 0.0809 | 4.9   |
| Rodentia    | Muridae         | <i>Mus</i>            | <i>musculus</i>     | 42   | 20.5     | 1.25   | 8.9    | 19  | 22   | 0.0298 | 4     |
| Rodentia    | Muridae         | <i>Rattus</i>         | <i>norvegicus</i>   | 90   | 300      | 5.81   | 63.8   | 21  | 25   | .      | 5     |
| Rodentia    | Muridae         | <i>Rattus</i>         | <i>rattus</i>       | 90   | 200      | 4.55   | 39.7   | 22  | 26   | 0.0207 | 4.2   |
| Rodentia    | Sciuridae       | <i>Callosciurus</i>   | <i>prevostii</i>    | .    | 400      | 16.35  | .      | 48  | .    | .      | 21.1  |
| Rodentia    | Sciuridae       | <i>Cynomys</i>        | <i>ludovicianus</i> | 730  | 1125     | 15.75  | 148.35 | 30  | 63   | 0.0111 | 11    |

|            |            |                     |                   |     |       |       |      |    |    |        |      |
|------------|------------|---------------------|-------------------|-----|-------|-------|------|----|----|--------|------|
| Rodentia   | Sciuridae  | <i>Tamiasciurus</i> | <i>hudsonicus</i> | 342 | 200   | 7     | 83.8 | 37 | 63 | 0.0216 | 9.8  |
| Scandentia | Tupaiaidae | <i>Tupaia</i>       | <i>glis</i>       | 90  | 200   | 12.94 | 100  | 46 | 36 | .      | 12.4 |
| Scandentia | Tupaiaidae | <i>Tupaia</i>       | <i>minor</i>      | .   | 58.6  | .     | .    | .  | .  | .      | 12.2 |
| Scandentia | Tupaiaidae | <i>Tupaia</i>       | <i>tana</i>       | .   | 197.8 | .     | .    | .  | 31 | .      | 11.6 |

## Birds

| Order        | Family   | Genus             | Species               | Female age<br>at maturity<br>(d) | Adult mass<br>(g) | Egg mass<br>(g) | Incubation period<br>(d) | Growth rate <i>k</i><br>(d) | Oldest<br>(y) |
|--------------|----------|-------------------|-----------------------|----------------------------------|-------------------|-----------------|--------------------------|-----------------------------|---------------|
| Anseriformes | Anatidae | <i>Aix</i>        | <i>galericulata</i>   | .                                | 299               | 41              | 29                       | 0.069                       | .             |
| Anseriformes | Anatidae | <i>Aix</i>        | <i>sponsa</i>         | 365                              | 630               | 43.3            | 29                       | .                           | 22.5          |
| Anseriformes | Anatidae | <i>Alopochen</i>  | <i>aegyptiacus</i>    | 730                              | 1935              | 97              | 29                       | .                           | 25.5          |
| Anseriformes | Anatidae | <i>Anas</i>       | <i>acuta</i>          | 240                              | 700               | 45              | 23                       | .                           | 27.4          |
| Anseriformes | Anatidae | <i>Anas</i>       | <i>capensis</i>       | .                                | 410               | 30              | 25                       | .                           | .             |
| Anseriformes | Anatidae | <i>Anas</i>       | <i>castanea</i>       | .                                | 500               | 40              | 26                       | .                           | .             |
| Anseriformes | Anatidae | <i>Anas</i>       | <i>clypeata</i>       | 240                              | 550               | 40              | 22                       | .                           | 20.4          |
| Anseriformes | Anatidae | <i>Anas</i>       | <i>penelope</i>       | 365                              | 800               | 44              | 24.5                     | .                           | 34.7          |
| Anseriformes | Anatidae | <i>Anas</i>       | <i>platyrhynchos</i>  | 365                              | 1200              | 60              | 26.5                     | 0.12                        | 29.1          |
| Anseriformes | Anatidae | <i>Anas</i>       | <i>rubripes</i>       | 365                              | 1160              | 63              | 27                       | 0.084                       | 26.4          |
| Anseriformes | Anatidae | <i>Anas</i>       | <i>strepera</i>       | 240                              | 650               | 44              | 26                       | 0.115                       | 22.3          |
| Anseriformes | Anatidae | <i>Anas</i>       | <i>sibilatrix</i>     | .                                | 828               | .               | .                        | .                           | .             |
| Anseriformes | Anatidae | <i>Anser</i>      | <i>albifrons</i>      | 1095                             | 2180              | 125             | 27                       | .                           | 47            |
| Anseriformes | Anatidae | <i>Anser</i>      | <i>anser</i>          | 1095                             | 3250              | 173             | 27.5                     | 0.104                       | 31            |
| Anseriformes | Anatidae | <i>Anser</i>      | <i>cygnoides</i>      | .                                | 3500              | 145             | 29                       | .                           | .             |
| Anseriformes | Anatidae | <i>Anser</i>      | <i>indicus</i>        | .                                | 2000              | 141             | 29                       | .                           | .             |
| Anseriformes | Anatidae | <i>Anser</i>      | <i>rossi</i>          | .                                | 1500              | 94              | 23.5                     | .                           | .             |
| Anseriformes | Anatidae | <i>Aythya</i>     | <i>americana</i>      | 365                              | 1020              | 65              | 25                       | 0.089                       | 22.6          |
| Anseriformes | Anatidae | <i>Aythya</i>     | <i>ferina</i>         | 365                              | 850               | 66              | 25                       | .                           | 23.2          |
| Anseriformes | Anatidae | <i>Aythya</i>     | <i>fuligula</i>       | 365                              | 660               | 56              | 24                       | 0.144                       | 22            |
| Anseriformes | Anatidae | <i>Aythya</i>     | <i>nyroca</i>         | .                                | 600               | 43              | 26                       | .                           | .             |
| Anseriformes | Anatidae | <i>Branta</i>     | <i>bernicla</i>       | 730                              | 1400              | 85              | 25.5                     | 0.08                        | 28.7          |
| Anseriformes | Anatidae | <i>Branta</i>     | <i>canadensis</i>     | 730                              | 5000              | 163             | 28                       | 0.113                       | 42            |
| Anseriformes | Anatidae | <i>Branta</i>     | <i>leucopsis</i>      | 730                              | 1600              | 107             | 24.5                     | .                           | 26.9          |
| Anseriformes | Anatidae | <i>Branta</i>     | <i>ruficollis</i>     | .                                | 1400              | 90              | 25                       | .                           | .             |
| Anseriformes | Anatidae | <i>Branta</i>     | <i>sandvicensis</i>   | 912                              | 2090              | 144             | 30                       | .                           | 42            |
| Anseriformes | Anatidae | <i>Bucephala</i>  | <i>clangula</i>       | 730                              | 650               | 57              | 28                       | .                           | 18.4          |
| Anseriformes | Anatidae | <i>Cairinia</i>   | <i>moschata</i>       | .                                | 1750              | 70              | 35                       | .                           | .             |
| Anseriformes | Anatidae | <i>Callonetta</i> | <i>leucophrys</i>     | .                                | 310               | 32              | 29                       | .                           | .             |
| Anseriformes | Anatidae | <i>Cereopsis</i>  | <i>novaeollandiae</i> | .                                | 3500              | 137             | 35                       | .                           | 28.1          |
| Anseriformes | Anatidae | <i>Cygnus</i>     | <i>atratus</i>        | .                                | 5000              | 300             | 39                       | .                           | .             |

|               |                |                      |                          |      |       |      |      |       |      |
|---------------|----------------|----------------------|--------------------------|------|-------|------|------|-------|------|
| Anseriformes  | Anatidae       | <i>Cygnus</i>        | <i>cygnus_buccinator</i> | 730  | 10200 | 324  | 32.5 | .     | 32.5 |
| Anseriformes  | Anatidae       | <i>Cygnus</i>        | <i>melanocoryphus</i>    | .    | 4000  | 247  | 35   | .     | .    |
| Anseriformes  | Anatidae       | <i>Cygnus</i>        | <i>olor</i>              | 1095 | 11000 | 340  | 35   | 0.08  | 70   |
| Anseriformes  | Anatidae       | <i>Marmaronetta</i>  | <i>anguirostris</i>      | .    | 470   | 31   | 25   | .     | .    |
| Anseriformes  | Anatidae       | <i>Mergus</i>        | <i>cucullatus</i>        | .    | 610   | .    | .    | .     | .    |
| Anseriformes  | Anatidae       | <i>Mergus</i>        | <i>merganser</i>         | 730  | 1300  | 85.2 | 28   | .     | 14.8 |
| Anseriformes  | Anatidae       | <i>Netta</i>         | <i>peposaca</i>          | .    | 1005  | 60   | 28   | .     | .    |
| Anseriformes  | Anatidae       | <i>Netta</i>         | <i>rufina</i>            | 365  | 1070  | 56   | 27   | .     | 7.2  |
| Anseriformes  | Anatidae       | <i>Oxyura</i>        | <i>jamaicensis</i>       | 365  | 510   | 73   | 23.5 | .     | 13.6 |
| Anseriformes  | Anatidae       | <i>Somateria</i>     | <i>mollissima</i>        | 730  | 2050  | 100  | 25.5 | 0.061 | 37.8 |
| Anseriformes  | Anatidae       | <i>Tadorna</i>       | <i>ferruginea</i>        | .    | 1250  | 83   | 29   | 0.151 | .    |
| Anseriformes  | Anatidae       | <i>Tadorna</i>       | <i>tadorna</i>           | 730  | 1000  | 78   | 30   | 0.074 | 24.8 |
| Anseriformes  | Dendrocygnidae | <i>Dendrocygna</i>   | <i>bicolor</i>           | 365  | 735   | 50   | 26   | .     | 6.5  |
| Anseriformes  | Dendrocygnidae | <i>Dendrocygna</i>   | <i>autumnalis</i>        | 365  | 830   | 44   | 26   | 0.17  | 8.2  |
| Anseriformes  | Dendrocygnidae | <i>Dendrocygna</i>   | <i>viduata</i>           | .    | 700   | 36   | 26   | .     | 12   |
| Ciconiiformes | Accipitridae   | <i>Aquila</i>        | <i>chrysaetos</i>        | 1460 | 5273  | 142  | 44   | 0.126 | 48   |
| Ciconiiformes | Accipitridae   | <i>Aquila</i>        | <i>rapax</i>             | .    | 2625  | 92.8 | 45   | 0.093 | 40.3 |
| Ciconiiformes | Accipitridae   | <i>Buteo</i>         | <i>jamaicensis</i>       | 730  | 1126  | .    | 31   | 0.188 | 29.5 |
| Ciconiiformes | Accipitridae   | <i>Falco</i>         | <i>sparverius</i>        | 365  | 75    | 16   | 29   | 0.285 | 17   |
| Ciconiiformes | Accipitridae   | <i>Falco</i>         | <i>tinnunculus</i>       | 365  | 230   | 21   | 28   | 0.294 | 23.8 |
| Ciconiiformes | Accipitridae   | <i>Gyps</i>          | <i>fulvus</i>            | 1460 | 7500  | 252  | 55.5 | 0.059 | 41.4 |
| Ciconiiformes | Accipitridae   | <i>Haliaeetus</i>    | <i>leucocephalus</i>     | 1460 | 5000  | 117  | 35   | 0.098 | 48   |
| Ciconiiformes | Accipitridae   | <i>Milvus</i>        | <i>migrans</i>           | 1095 | 625   | 56   | 34   | 0.179 | 24   |
| Ciconiiformes | Ardeidae       | <i>Ardea</i>         | <i>cinerea</i>           | 730  | 1500  | 49.6 | 25.5 | 0.149 | 35.1 |
| Ciconiiformes | Ardeidae       | <i>Ardeola</i>       | <i>ibis</i>              | .    | 338   | .    | .    | .     | .    |
| Ciconiiformes | Ardeidae       | <i>Egretta</i>       | <i>thula</i>             | 365  | 371   | .    | 18   | 0.253 | 22.8 |
| Ciconiiformes | Ardeidae       | <i>Nycticorax</i>    | <i>nycticorax</i>        | 365  | 650   | 20.8 | 25   | .     | 21.1 |
| Ciconiiformes | Charadriidae   | <i>Himantopus</i>    | <i>himantopus</i>        | .    | 161   | 22.8 | 24   | 0.175 | 10.2 |
| Ciconiiformes | Charadriidae   | <i>Recurvirostra</i> | <i>avosetta</i>          | 730  | 340   | 31.7 | 23.4 | 0.192 | 27.8 |
| Ciconiiformes | Charadriidae   | <i>Vanellus</i>      | <i>armatus</i>           | .    | 156   | .    | .    | .     | .    |
| Ciconiiformes | Charadriidae   | <i>Vanellus</i>      | <i>miles</i>             | .    | 379   | .    | .    | .     | .    |
| Ciconiiformes | Charadriidae   | <i>Vanellus</i>      | <i>spinosus</i>          | .    | 152   | .    | .    | .     | 17   |
| Ciconiiformes | Ciconiidae     | <i>Ciconia</i>       | <i>ciconia</i>           | 1460 | 3350  | 75.1 | 33.5 | 0.17  | 39   |
| Ciconiiformes | Ciconiidae     | <i>Ciconia</i>       | <i>nigra</i>             | .    | 3000  | .    | .    | .     | 31.3 |
| Ciconiiformes | Ciconiidae     | <i>Leptoptilos</i>   | <i>crumeniferus</i>      | 1460 | 6325  | .    | 30   | 0.073 | 44.7 |
| Ciconiiformes | Ciconiidae     | <i>Sarcorhamphus</i> | <i>papa</i>              | .    | 3400  | .    | 57   | 0.078 | 40   |
| Ciconiiformes | Ciconiidae     | <i>Vultur</i>        | <i>gryphus</i>           | 2555 | 11300 | .    | 56   | 0.078 | 75   |
| Ciconiiformes | Laridae        | <i>Fratercula</i>    | <i>arctica</i>           | 1460 | 500   | 65   | 38   | 0.145 | 33.8 |
| Ciconiiformes | Laridae        | <i>Larosterna</i>    | <i>inca</i>              | .    | 180   | .    | .    | .     | .    |
| Ciconiiformes | Laridae        | <i>Lunda</i>         | <i>cirrhata</i>          | .    | 779   | .    | .    | .     | .    |
| Ciconiiformes | Pelecanidae    | <i>Pelecanus</i>     | <i>crispus</i>           | .    | 9000  | .    | .    | .     | 35.3 |
| Ciconiiformes | Pelecanidae    | <i>Pelecanus</i>     | <i>erythrorhynchos</i>   | 1095 | 7000  | .    | 36   | 0.113 | 54   |
| Ciconiiformes | Pelecanidae    | <i>Pelecanus</i>     | <i>occidentalis</i>      | 365  | 3500  | 92.1 | 28   | 0.112 | 43   |



|               |                   |                       |                        |      |        |      |      |         |      |
|---------------|-------------------|-----------------------|------------------------|------|--------|------|------|---------|------|
| Ciconiiformes | Pelecanidae       | <i>Pelecanus</i>      | <i>onocrotalus</i>     | .    | 9520   | .    | .    | .       | 51   |
| Ciconiiformes | Pelecanidae       | <i>Pelecanus</i>      | <i>rufescens</i>       | .    | 5200   | .    | .    | .       | .    |
| Ciconiiformes | Phalacrocoracidae | <i>Phalacrocorax</i>  | <i>carbo</i>           | 1460 | 2200   | 58   | 28.5 | 0.115   | 23.5 |
| Ciconiiformes | Phoenicopteridae  | <i>Phoeniconaias</i>  | <i>minor</i>           | .    | 1900   | .    | .    | .       | .    |
| Ciconiiformes | Phoenicopteridae  | <i>Phoenicopterus</i> | <i>chilensis</i>       | .    | 2277   | .    | .    | .       | 36.7 |
| Ciconiiformes | Phoenicopteridae  | <i>Phoenicopterus</i> | <i>ruber</i>           | 1825 | 3035   | .    | 30   | .       | 44   |
| Ciconiiformes | Scopidae          | <i>Scopus</i>         | <i>umbretta</i>        | .    | 422.5  | .    | .    | .       | .    |
| Ciconiiformes | Spheniscidae      | <i>Aptenodytes</i>    | <i>patagonica</i>      | .    | 16000  | 300  | 53   | 0.124   | 26   |
| Ciconiiformes | Spheniscidae      | <i>Eudyptes</i>       | <i>crestatus</i>       | .    | 2500   | 110  | 34   | 0.068   | .    |
| Ciconiiformes | Spheniscidae      | <i>Eudyptula</i>      | <i>minor</i>           | .    | 1100   | 52   | 39   | 0.13625 | .    |
| Ciconiiformes | Spheniscidae      | <i>Spheniscus</i>     | <i>demersus</i>        | .    | 2900   | 103  | 40   | 0.06625 | .    |
| Ciconiiformes | Spheniscidae      | <i>Spheniscus</i>     | <i>humboldti</i>       | .    | 5000   | .    | .    | .       | .    |
| Ciconiiformes | Spheniscidae      | <i>Spheniscus</i>     | <i>magellanicus</i>    | 1040 | 4500   | .    | 40   | 0.069   | 30   |
| Ciconiiformes | Threskiornithidae | <i>Ajaja</i>          | <i>ajaja</i>           | .    | 1522.5 | .    | .    | .       | .    |
| Ciconiiformes | Threskiornithidae | <i>Eudocimus</i>      | <i>albus</i>           | 730  | 900    | .    | 22   | 0.13    | 27.6 |
| Ciconiiformes | Threskiornithidae | <i>Eudocimus</i>      | <i>ruber</i>           | .    | 664.5  | .    | 23   | .       | 33.2 |
| Ciconiiformes | Threskiornithidae | <i>Geronticus</i>     | <i>eremita</i>         | .    | 1200   | .    | .    | 0.237   | 32.9 |
| Ciconiiformes | Threskiornithidae | <i>Platalea</i>       | <i>alba</i>            | .    | 1521   | .    | .    | .       | 17.9 |
| Ciconiiformes | Threskiornithidae | <i>Platalea</i>       | <i>leucorodia</i>      | 1095 | 1892   | .    | .    | 0.174   | 30.1 |
| Ciconiiformes | Threskiornithidae | <i>Plegadis</i>       | <i>falcinellus</i>     | 1095 | 633.75 | .    | 21   | .       | 26.8 |
| Ciconiiformes | Threskiornithidae | <i>Threskiornis</i>   | <i>aethiopicus</i>     | .    | 1497   | .    | .    | .       | 37   |
| Coliiformes   | Coliidae          | <i>Colius</i>         | <i>striatus</i>        | .    | 55     | 2.7  | 12   | .       | .    |
| Columbiformes | Columbidae        | <i>Caloenas</i>       | <i>nicobarica</i>      | .    | 492    | .    | .    | .       | .    |
| Columbiformes | Columbidae        | <i>Columba</i>        | <i>guinea</i>          | .    | 352    | 14.6 | 16   | 0.254   | .    |
| Columbiformes | Columbidae        | <i>Columba</i>        | <i>livia</i>           | 140  | 282    | 17   | 17.5 | 0.28    | 35   |
| Columbiformes | Columbidae        | <i>Ducula</i>         | <i>bicolor</i>         | .    | 483    | .    | .    | .       | .    |
| Columbiformes | Columbidae        | <i>Galliolumba</i>    | <i>luzonica</i>        | .    | 196    | .    | .    | .       | .    |
| Columbiformes | Columbidae        | <i>Geopelia</i>       | <i>cuneata</i>         | .    | 30     | 2.4  | 13   | 0.129   | .    |
| Columbiformes | Columbidae        | <i>Geopelia</i>       | <i>striata</i>         | .    | 36.5   | 3.2  | 13.5 | .       | .    |
| Columbiformes | Columbidae        | <i>Goura</i>          | <i>victoria</i>        | .    | 2000   | .    | .    | .       | .    |
| Columbiformes | Columbidae        | <i>Ocyphaps</i>       | <i>lophotes</i>        | .    | 205    | .    | .    | .       | .    |
| Columbiformes | Columbidae        | <i>Ptilinopus</i>     | <i>jambu</i>           | .    | 135    | .    | .    | .       | .    |
| Columbiformes | Columbidae        | <i>Streptopelia</i>   | <i>risoria</i>         | .    | 134.2  | 8.1  | 13.5 | 0.333   | 12   |
| Coraciiformes | Bucerotidae       | <i>Aceros</i>         | <i>undulatus</i>       | .    | .      | .    | .    | .       | .    |
| Coraciiformes | Bucerotidae       | <i>Bucorvus</i>       | <i>abyssinicus</i>     | .    | 4000   | .    | .    | .       | 70   |
| Coraciiformes | Bucerotidae       | <i>Tockus</i>         | <i>erythrorhynchus</i> | .    | 139    | .    | .    | .       | .    |
| Coraciiformes | Coraciidae        | <i>Coracias</i>       | <i>caudata</i>         | .    | 160    | 14.3 | 17.5 | 0.249   | 9.2  |
| Coraciiformes | Dacelonidae       | <i>Dacelo</i>         | <i>novaeguineae</i>    | .    | 305    | .    | .    | .       | .    |
| Coraciiformes | Momotidae         | <i>Momotus</i>        | <i>momota</i>          | .    | 120    | 13.1 | 21   | .       | 10.4 |
| Craciformes   | Megapodiidae      | <i>Alectura</i>       | <i>lathami</i>         | .    | 2330   | .    | .    | 0.03    | 12.5 |
| Galliformes   | Numididae         | <i>Acryllium</i>      | <i>vulturinum</i>      | .    | 1390   | .    | .    | .       | .    |
| Galliformes   | Numididae         | <i>Numida</i>         | <i>meleagris</i>       | .    | 1299   | .    | .    | .       | .    |
| Galliformes   | Phasianidae       | <i>Alectoris</i>      | <i>chukar</i>          | .    | 578    | 22.6 | 23   | 0.051   | 6.2  |

|                 |               |                     |                         |      |        |       |       |       |      |
|-----------------|---------------|---------------------|-------------------------|------|--------|-------|-------|-------|------|
| Galliformes     | Phasianidae   | <i>Chrysolophus</i> | <i>amherstiae</i>       | .    | 700    | 29.7  | 24    | .     | .    |
| Galliformes     | Phasianidae   | <i>Chrysolophus</i> | <i>pictus</i>           | .    | 550.00 | 32.10 | 24.00 | .     | .    |
| Galliformes     | Phasianidae   | <i>Gallus</i>       | <i>gallus</i>           | .    | 2050   | 36    | 21    | 0.037 | 30   |
| Galliformes     | Phasianidae   | <i>Lophophorus</i>  | <i>impeyanus</i>        | .    | 2078   | 63.7  | 28    | .     | .    |
| Galliformes     | Phasianidae   | <i>Lophura</i>      | <i>edwardsi</i>         | .    | 1082   | .     | .     | .     | .    |
| Galliformes     | Phasianidae   | <i>Lophura</i>      | <i>nycthemera</i>       | .    | 1250   | 39.9  | 26    | .     | .    |
| Galliformes     | Phasianidae   | <i>Meleagris</i>    | <i>gallopavo</i>        | 304  | 5811   | .     | 28    | 0.023 | 13   |
| Galliformes     | Phasianidae   | <i>Pavo</i>         | <i>cristatus</i>        | 730  | 3500   | 90    | 28    | 0.03  | 23.2 |
| Galliformes     | Phasianidae   | <i>Phasianus</i>    | <i>colchicus</i>        | 240  | 1132.8 | 29.2  | 24    | 0.043 | 27   |
| Galliformes     | Phasianidae   | <i>Rollulus</i>     | <i>roulroul</i>         | .    | 217    | .     | .     | .     | .    |
| Galliformes     | Phasianidae   | <i>Syrmaticus</i>   | <i>reevesi</i>          | .    | 1239   | .     | .     | .     | 9.2  |
| Galliformes     | Phasianidae   | <i>Tympanuchus</i>  | <i>cupido_attwateri</i> | 365  | 885    | 23.8  | 24.5  | 0.064 | 5    |
| Gruiformes      | Eurypygidae   | <i>Eurypyga</i>     | <i>helias</i>           | .    | 222    | .     | 27    | .     | 15   |
| Gruiformes      | Gruidae       | <i>Anthropoides</i> | <i>virgo</i>            | 730  | 2308   | .     | 28    | 0.084 | 27   |
| Gruiformes      | Gruidae       | <i>Balearica</i>    | <i>pavonina</i>         | .    | 3590   | .     | .     | 0.065 | .    |
| Gruiformes      | Gruidae       | <i>Balearica</i>    | <i>regulorum</i>        | .    | 3772   | .     | .     | .     | .    |
| Gruiformes      | Gruidae       | <i>Grus</i>         | <i>antigone</i>         | .    | 8863   | 214.3 | 31.8  | 0.052 | .    |
| Gruiformes      | Gruidae       | <i>Grus</i>         | <i>canadensis</i>       | 1095 | 4368.5 | 196.4 | 26.7  | 0.047 | 31.2 |
| Gruiformes      | Gruidae       | <i>Grus</i>         | <i>grus</i>             | 1825 | 5500   | 200   | 30    | 0.054 | 43   |
| Gruiformes      | Gruidae       | <i>Grus</i>         | <i>vipio</i>            | 1095 | 4663   | 188.2 | 30.6  | 0.057 | 45   |
| Gruiformes      | Rallidae      | <i>Fulica</i>       | <i>atra</i>             | 365  | 102    | .     | .     | 0.174 | 20.6 |
| Musophagiformes | Musophaginae  | <i>Musophaga</i>    | <i>violacea</i>         | .    | 360    | .     | .     | .     | .    |
| Musophagiformes | Musophaginae  | <i>Tauraco</i>      | <i>corythaix</i>        | .    | 297    | 26.3  | 25    | .     | 12.4 |
| Passeriformes   | Bombycillidae | <i>Bombycilla</i>   | <i>cedrorum</i>         | 365  | 31.8   | .     | 14    | 0.52  | 8.2  |
| Passeriformes   | Corvidae      | <i>Corvus</i>       | <i>brachyrhynchos</i>   | 730  | 440    | 38    | 16.5  | 0.172 | 20   |
| Passeriformes   | Corvidae      | <i>Corvus</i>       | <i>corax</i>            | 1095 | 1199   | .     | 19    | .     | 69   |
| Passeriformes   | Fringillidae  | <i>Cyanerpes</i>    | <i>cyaneus</i>          | .    | 14     | 1.8   | 12.2  | 0.28  | 17   |
| Passeriformes   | Fringillidae  | <i>Ramphocelus</i>  | <i>carbo</i>            | .    | 28     | 3.4   | 12    | 0.504 | .    |
| Passeriformes   | Fringillidae  | <i>Thraupis</i>     | <i>episcopus</i>        | .    | 35     | 3.1   | 13.7  | 0.37  | 9.5  |
| Passeriformes   | Irenidae      | <i>Irena</i>        | <i>puella</i>           | .    | 62.5   | .     | .     | .     | .    |
| Passeriformes   | Muscicapidae  | <i>Leiothrix</i>    | <i>argentaureis</i>     | .    | 28.4   | .     | .     | .     | .    |
| Passeriformes   | Muscicapidae  | <i>Leiothrix</i>    | <i>lutea</i>            | .    | 21.8   | .     | .     | .     | .    |
| Passeriformes   | Passeridae    | <i>Amadina</i>      | <i>fasciata</i>         | .    | 15.5   | 1.5   | 12.5  | .     | .    |
| Passeriformes   | Passeridae    | <i>Amandava</i>     | <i>amandava</i>         | .    | 9.6    | .     | .     | 0.382 | .    |
| Passeriformes   | Passeridae    | <i>Carduelis</i>    | <i>carduelis</i>        | 365  | 15.6   | .     | .     | .     | 27   |
| Passeriformes   | Passeridae    | <i>Chloebia</i>     | <i>gouldiae</i>         | .    | 14.5   | .     | .     | .     | .    |
| Passeriformes   | Passeridae    | <i>Emblema</i>      | <i>guttata</i>          | .    | 19     | .     | .     | .     | .    |
| Passeriformes   | Passeridae    | <i>Euplectes</i>    | <i>orix</i>             | .    | 16.2   | 1.7   | 12.5  | .     | .    |
| Passeriformes   | Passeridae    | <i>Neochmia</i>     | <i>ruficauda</i>        | .    | 10.5   | .     | .     | .     | .    |
| Passeriformes   | Passeridae    | <i>Padda</i>        | <i>oryzivora</i>        | .    | 24.8   | .     | 14    | .     | .    |
| Passeriformes   | Passeridae    | <i>Ploceus</i>      | <i>cucullatus</i>       | .    | 41     | 2.8   | 12    | .     | .    |
| Passeriformes   | Passeridae    | <i>Poephila</i>     | <i>acuticauda</i>       | .    | .      | .     | .     | .     | .    |
| Passeriformes   | Passeridae    | <i>Poephila</i>     | <i>guttata</i>          | 60   | 11     | 0.9   | 14    | 0.255 | 12   |

|                  |              |                      |                      |     |       |       |      |        |      |
|------------------|--------------|----------------------|----------------------|-----|-------|-------|------|--------|------|
| Passeriformes    | Passeridae   | <i>Serinus</i>       | <i>canaria</i>       | .   | 8.4   | .     | .    | 0.315  | 24   |
| Passeriformes    | Passeridae   | <i>Uraeginthus</i>   | <i>cynocephala</i>   | .   | 10.1  | .     | .    | .      | .    |
| Passeriformes    | Pycnonotidae | <i>Pycnonotus</i>    | <i>jocosus</i>       | .   | 27.4  | .     | 12   | .      | 11.1 |
| Passeriformes    | Sturnidae    | <i>Cosmopsarus</i>   | <i>regius</i>        | .   | .     | .     | .    | .      | .    |
| Passeriformes    | Sturnidae    | <i>Gracula</i>       | <i>religiosa</i>     | .   | 192   | .     | .    | .      | .    |
| Passeriformes    | Sturnidae    | <i>Lamprotornis</i>  | <i>iris</i>          | .   | 100   | 5.6   | 14   | .      | .    |
| Passeriformes    | Sturnidae    | <i>Leucopsar</i>     | <i>rothschildi</i>   | .   | .     | .     | 13   | .      | 24   |
| Passeriformes    | Sturnidae    | <i>Spreo</i>         | <i>superbus</i>      | .   | .     | .     | .    | .      | .    |
| Passeriformes    | Turdidae     | <i>Copsychus</i>     | <i>malabaricus</i>   | .   | 30    | .     | .    | .      | .    |
| Passeriformes    | Zosteropidae | <i>Zosterops</i>     | <i>palpebrosa</i>    | 365 | 8.6   | .     | 11   | .      | 5.1  |
| Piciformes       | Ramphastidae | <i>Ramphastos</i>    | <i>toco</i>          | .   | 339   | 17.3  | 15.3 | 0.199  | .    |
| Psittaciformes   | Psittacidae  | <i>Agapornis</i>     | <i>fisheri</i>       | .   | 42    | 3.5   | 23   | .      | 12.6 |
| Psittaciformes   | Psittacidae  | <i>Agapornis</i>     | <i>personata</i>     | .   | 40    | 3.6   | 23   | 0.235  | .    |
| Psittaciformes   | Psittacidae  | <i>Agapornis</i>     | <i>roseicollis</i>   | .   | 45    | 3.7   | 23.3 | 0.231  | .    |
| Psittaciformes   | Psittacidae  | <i>Amazona</i>       | <i>aestiva</i>       | .   | 300   | 17.5  | 29   | 0.181  | 49   |
| Psittaciformes   | Psittacidae  | <i>Amazona</i>       | <i>ochrocephala</i>  | .   | 302.5 | 20.9  | 29   | 0.158  | 56   |
| Psittaciformes   | Psittacidae  | <i>Anodorhynchus</i> | <i>hyacinthinus</i>  | .   | 1500  | .     | .    | .      | 38.8 |
| Psittaciformes   | Psittacidae  | <i>Ara</i>           | <i>ararauna</i>      | .   | 1125  | .     | .    | 0.126  | 43   |
| Psittaciformes   | Psittacidae  | <i>Ara</i>           | <i>chloroptera</i>   | .   | 1250  | .     | .    | 0.112  | 50.1 |
| Psittaciformes   | Psittacidae  | <i>Ara</i>           | <i>macao</i>         | .   | 1015  | .     | .    | 0.12   | 33   |
| Psittaciformes   | Psittacidae  | <i>Ara</i>           | <i>militaris</i>     | .   | 1134  | .     | .    | 0.12   | 46   |
| Psittaciformes   | Psittacidae  | <i>Aratinga</i>      | <i>solstitialis</i>  | .   | .     | .     | .    | .      | .    |
| Psittaciformes   | Psittacidae  | <i>Cacatua</i>       | <i>galerita</i>      | .   | 450   | 27.3  | 30   | 0.126  | 57   |
| Psittaciformes   | Psittacidae  | <i>Cacatua</i>       | <i>moluccensis</i>   | .   | 335   | 29.2  | 30   | .      | 65.8 |
| Psittaciformes   | Psittacidae  | <i>Cyanoliseus</i>   | <i>patagonus</i>     | .   | 273   | .     | .    | .      | 19.5 |
| Psittaciformes   | Psittacidae  | <i>Eclectus</i>      | <i>roratus</i>       | .   | 428   | 20.2  | 26   | 0.128  | 28.5 |
| Psittaciformes   | Psittacidae  | <i>Eolophus</i>      | <i>roseicapillus</i> | .   | 320   | 13    | 28   | 0.173  | 40   |
| Psittaciformes   | Psittacidae  | <i>Melopsittacus</i> | <i>undulatus</i>     | 180 | 28    | 2.2   | 18   | 0.231  | 21   |
| Psittaciformes   | Psittacidae  | <i>Myiopsitta</i>    | <i>monachus</i>      | 730 | 101   | .     | 31   | 0.244  | 22.1 |
| Psittaciformes   | Psittacidae  | <i>Nymphicus</i>     | <i>hollandicus</i>   | .   | 85    | 4.6   | 22   | .      | 35   |
| Psittaciformes   | Psittacidae  | <i>Psittacula</i>    | <i>krameri</i>       | .   | 110   | 8.7   | 23   | .      | .    |
| Psittaciformes   | Psittacidae  | <i>Psittacus</i>     | <i>erithacus</i>     | .   | 250   | .     | .    | 0.128  | 49.7 |
| Psittaciformes   | Psittacidae  | <i>Trichoglossus</i> | <i>haematodus</i>    | .   | 136   | 7.1   | 25   | .      | 16.1 |
| Strigiformes     | Podargidae   | <i>Podargus</i>      | <i>strigoides</i>    | .   | 350   | .     | .    | .      | .    |
| Strigiformes     | Strigidae    | <i>Athene</i>        | <i>cunicularia</i>   | 365 | 155   | .     | 28   | .      | 11   |
| Strigiformes     | Strigidae    | <i>Bubo</i>          | <i>bubo</i>          | 730 | 2000  | 69.3  | 35   | 0.12   | 68   |
| Strigiformes     | Strigidae    | <i>Bubo</i>          | <i>virginianus</i>   | 730 | 1543  | .     | 27   | 0.138  | 29   |
| Strigiformes     | Strigidae    | <i>Nyctea</i>        | <i>scandiaca</i>     | .   | 1049  | 60.3  | 32   | 0.148  | .    |
| Strigiformes     | Strigidae    | <i>Otus</i>          | <i>asio</i>          | 365 | 129.8 | 16.5  | 23   | 0.264  | 8.1  |
| Strigiformes     | Strigidae    | <i>Pulsatrix</i>     | <i>perspicillata</i> | .   | 873   | .     | 36   | .      | 25   |
| Strigiformes     | Strigidae    | <i>Strix</i>         | <i>varia</i>         | 730 | 716.5 | .     | 28   | 0.101  | 23   |
| Strigiformes     | Tytonidae    | <i>Tyto</i>          | <i>alba</i>          | 365 | 381.6 | 18.7  | 30.5 | 0.17   | 34   |
| Struthioniformes | Apterygidae  | <i>Apteryx</i>       | <i>australis</i>     | .   | 2250  | 402.6 | 79   | 0.0312 | 35   |

|                  |               |                 |                        |   |       |      |    |   |      |
|------------------|---------------|-----------------|------------------------|---|-------|------|----|---|------|
| Struthioniformes | Casuaridae    | <i>Dromaius</i> | <i>novaehollandiae</i> | . | 40500 | 578  | 59 | . | 16.6 |
| Struthioniformes | Rheidae       | <i>Rhea</i>     | <i>americana</i>       | . | 20000 | 609  | 40 | . | .    |
| Struthioniformes | Struthionidae | <i>Struthio</i> | <i>camelus</i>         | . | 90000 | 1517 | 42 | . | 50   |

## Reptiles and amphibians

| Class    | Order      | Family         | Genus                | Species                    | Female age at maturity (d) | Adult body mass (g) | Adult length (m) | Incubation period (d) | Longevity (y) |
|----------|------------|----------------|----------------------|----------------------------|----------------------------|---------------------|------------------|-----------------------|---------------|
| Reptilia | Squamata   | Agamidae       | <i>Pogona</i>        | <i>vitticeps</i>           | 547.5                      | 3970                | 0.470            | 65                    | .             |
| Reptilia | Squamata   | Anguidae       | <i>Ophisaurus</i>    | <i>apodus</i>              | .                          | .                   | .                | .                     | .             |
| Reptilia | Squamata   | Boidae         | <i>Boa</i>           | <i>constrictor</i>         | 1095                       | 3532                | 2.500            | 125                   | 40.4          |
| Reptilia | Squamata   | Boidae         | <i>Chondropython</i> | <i>viridis</i>             | .                          | .                   | .                | .                     | .             |
| Reptilia | Squamata   | Boidae         | <i>Eunectes</i>      | <i>murinus</i>             | 912.5                      | 97500               | 5.200            | 180                   | 31.8          |
| Reptilia | Squamata   | Boidae         | <i>Python</i>        | <i>reticulatus</i>         | 1095                       | 32000               | 6.248            | 85                    | 29.4          |
| Reptilia | Squamata   | Boidae         | <i>Python</i>        | <i>regius</i>              | 1825                       | 11609               | 1.500            | 77                    | 47.5          |
| Reptilia | Squamata   | Boidae         | <i>Python</i>        | <i>molurus bivittatus</i>  | 1095                       | .                   | .                | 100                   | 34.2          |
| Reptilia | Squamata   | Boidae         | <i>Sanzinia</i>      | <i>madagascariensis</i>    | .                          | .                   | .                | .                     | .             |
| Reptilia | Squamata   | Chamaeleonidae | <i>Chamaeleo</i>     | <i>calypttratus</i>        | 135                        | 4365                | 0.521            | .                     | .             |
| Reptilia | Squamata   | Colubridae     | <i>Elaphe</i>        | <i>guttata</i>             | 600                        | 900                 | 0.165            | 60                    | 32.3          |
| Reptilia | Squamata   | Colubridae     | <i>Lampropeltis</i>  | <i>getulus californiae</i> | 1095                       | .                   | .                | 64                    | 33.3          |
| Reptilia | Squamata   | Gekkonidae     | <i>Eublepharis</i>   | <i>macularius</i>          | 400                        | .                   | .                | 55                    | 28.5          |
| Reptilia | Squamata   | Gekkonidae     | <i>Phelsuma</i>      | <i>standingi</i>           | .                          | 214.5               | 0.020            | .                     | 9.6           |
| Reptilia | Squamata   | Helodermatidae | <i>Heloderma</i>     | <i>suspectum suspectum</i> | .                          | 555.7               | 0.056            | 300                   | 28.9          |
| Reptilia | Squamata   | Helodermatidae | <i>Heloderma</i>     | <i>suspectum</i>           | .                          | .                   | .                | .                     | 28.9          |
| Reptilia | Squamata   | Iguanidae      | <i>Iguana</i>        | <i>iguana</i>              | 1640                       | 5000                | 1.750            | 105                   | 19.8          |
| Reptilia | Squamata   | Scincidae      | <i>Corucia</i>       | <i>zebrata</i>             | .                          | .                   | .                | .                     | 24.3          |
| Reptilia | Squamata   | Viperidae      | <i>Bitis</i>         | <i>gabonica rhinoceros</i> | .                          | 8500                | 1.200            | 210                   | 18.0          |
| Reptilia | Squamata   | Viperidae      | <i>Crotalus</i>      | <i>atrox</i>               | 1095                       | 6700                | 1.500            | 167                   | 27.0          |
| Reptilia | Squamata   | Xenosauridae   | <i>Shinisaurus</i>   | <i>crocodilurus</i>        | .                          | .                   | .                | .                     | .             |
| Reptilia | Crocodylia | Crocodylidae   | <i>Alligator</i>     | <i>sinensis</i>            | 2190                       | 11250               | 1.450            | .                     | 60.7          |
| Reptilia | Crocodylia | Crocodylidae   | <i>Alligator</i>     | <i>mississippiensis</i>    | 4830                       | 170000              | 3.000            | 65                    | 73.1          |
| Reptilia | Crocodylia | Crocodylidae   | <i>Crocodylus</i>    | <i>niloticus</i>           | .                          | .                   | .                | .                     | 43.8          |
| Reptilia | Crocodylia | Crocodylidae   | <i>Paleosuchus</i>   | <i>palpebrosus</i>         | 3650                       | 6500                | 1.500            | 90                    | 24.1          |
| Reptilia | Chelonia   | Chelidae       | <i>Chelus</i>        | <i>fimbriatus</i>          | .                          | 3814                | 0.450            | 200                   | 35.8          |
| Reptilia | Chelonia   | Chelydridae    | <i>Chelydra</i>      | <i>serpentina</i>          | 3285                       | 10250               | 0.325            | 126                   | 47.0          |
| Reptilia | Chelonia   | Emydidae       | <i>Terrapene</i>     | <i>carolina triunguis</i>  | 2190                       | 1339                | 0.145            | .                     | 138.0         |
| Reptilia | Chelonia   | Emydidae       | <i>Trachemys</i>     | <i>scripta elegans</i>     | 2920                       | 240                 | 0.207            | 75                    | 41.3          |

|          |          |                 |                      |                      |      |       |       |     |       |
|----------|----------|-----------------|----------------------|----------------------|------|-------|-------|-----|-------|
| Reptilia | Chelonia | Pelomedusidae   | <i>Podocnemis</i>    | <i>unifilis</i>      | .    | 4500  | .     | 60  | 70.0  |
| Reptilia | Chelonia | Testudinidae    | <i>Geochelone</i>    | <i>elephantopus</i>  | .    | .     | .     | .   | .     |
| Reptilia | Chelonia | Testudinidae    | <i>Geochelone</i>    | <i>carbonaria</i>    | .    | .     | .     | .   | 49.0  |
| Reptilia | Chelonia | Testudinidae    | <i>Geochelone</i>    | <i>elegans</i>       | 3650 | 3600  | 0.265 | 130 | 24.3  |
| Reptilia | Chelonia | Testudinidae    | <i>Geochelone</i>    | <i>pardalis</i>      | .    | .     | .     | .   | 30.0  |
| Reptilia | Chelonia | Testudinidae    | <i>Geochelone</i>    | <i>gigantea</i>      | .    | .     | .     | .   | 152.0 |
| Reptilia | Chelonia | Testudinidae    | <i>Gopherus</i>      | <i>agassizii</i>     | 5500 | 17000 | 0.255 | 118 | 62.8  |
| Reptilia | Chelonia | Testudinidae    | <i>Malacochersus</i> | <i>tornieri</i>      | .    | .     | .     | .   | 25.9  |
| Reptilia | Chelonia | Testudinidae    | <i>Testudo</i>       | <i>graeca</i>        | 4650 | 320   | .     | .   | 127.0 |
| Reptilia | Chelonia | Testudinidae    | <i>Testudo</i>       | <i>hermanni</i>      | 4650 | .     | .     | .   | .     |
| Amphibia | Caudata  | Ambystomatidae  | <i>Ambystoma</i>     | <i>tigrinum</i>      | 1460 | 9.4   | 0.250 | 28  | 25.0  |
| Amphibia | Caudata  | Salamandridae   | <i>Salamandra</i>    | <i>Salamandra</i>    | .    | 19.1  | 0.200 | .   | 24.0  |
| Amphibia | Anura    | Bufo            | <i>Bufo</i>          | <i>baxteri</i>       | .    | .     | .     | .   | .     |
| Amphibia | Anura    | Dendrobatidae   | <i>Dendrobates</i>   | <i>azureus</i>       | 730  | 3     | 0.038 | 16  | 7.6   |
| Amphibia | Anura    | Dendrobatidae   | <i>Dendrobates</i>   | <i>tinctorius</i>    | .    | 5.00  | 0.045 | .   | .     |
| Amphibia | Anura    | Dendrobatidae   | <i>Dendrobates</i>   | <i>auratus</i>       | 365  | .     | 0.040 | 12  | 20.5  |
| Amphibia | Anura    | Hylidae         | <i>Agalychnis</i>    | <i>callidryas</i>    | .    | .     | .     | .   | 4.1   |
| Amphibia | Anura    | Hylidae         | <i>Litoria</i>       | <i>caerulea</i>      | 730  | 9.73  | 0.093 | 2   | 20.0  |
| Amphibia | Anura    | Leptodactylidae | <i>Leptodactylus</i> | <i>pentadactylus</i> | .    | .     | .     | .   | 18.8  |
| Amphibia | Anura    | Microhylidae    | <i>Dyscophus</i>     | <i>antongilii</i>    | .    | .     | .     | .   | .     |
| Amphibia | Anura    | Pipidae         | <i>Pipa</i>          | <i>pipa</i>          | .    | 14.09 | 0.138 | .   | 7.7   |
| Amphibia | Anura    | Ranidae         | <i>Rana</i>          | <i>catesbeiana</i>   | 1460 | 54.4  | 0.138 | 4   | 16.0  |

APPENDIX 7. Body mass in reptiles and amphibians estimated from the mass-length relationship.

In many species of reptiles and amphibians, body mass values are not available. It is, however, possible to use body length to predict body mass, as shown in an analysis of covariance of body mass (effect = class, covariate = length) of the data compiled for this analysis. Body lengths (m) and masses (g) were recorded as the means or middle values for adult individuals. All values are log-10 transformed. Interactions between taxon and length were not significant ( $P > 0.05$ ). The following relationship was used to calculate body mass from length for several species of reptiles and amphibians:  $\log_{10}(\text{mass}) = 3.90 (\pm 0.15 \text{ SE}) + 0.924 (\pm 0.275 \text{ SE}) \log_{10}(\text{length}) - 1.96 (\pm 0.40 \text{ SE})$  for Amphibia ( $F_{2,14} = 44$ ,  $P < 0.0001$ ,  $R^2 = 0.863$ ).

APPENDIX 8. The relationship between the initial, or extrinsic, mortality rate ( $m_0$ ) in wild and captive populations of mammals.

The actuarial rate of aging ( $\omega$ ) has been shown to be positively related to the extrinsic mortality rate independent of body mass in birds, mammals, and reptiles (4, 8). However, these relationships were based on a relatively small sample of wild populations. It would be useful for comparative analyses if extrinsic mortality in the wild could be estimated from  $m_0$  in captivity, for which many values are available.

Ricklefs (9) reported on a data set consisting of matched species or close relatives in captivity (zoo) and in natural environments. The 57 observations (33 wild, 24 zoo) represented 18 sets of paired taxa. Multiple observations for each comparison were averaged, providing 36 observations for 18 pairs.  $m_0$  was log-transformed for analysis with comparison ( $n = 18$ ) and wild vs. captive as effects.

For  $\log m_0$ , wild vs. zoo was not significant ( $F_{1,17} = 2.63$ ,  $P = 0.12$ ), although captive populations had somewhat lower  $\log m_0$  ( $-1.03 \pm 0.33$  SD) than the wild populations ( $-0.88 \pm 0.51$  SD); differences between comparisons were significant ( $F_{17,17} = 3.50$ ,  $P = 0.0068$ ) (overall  $F_{18,17} = 3.45$ ,  $P = 0.0065$ ,  $R^2 = 0.785$ ).

With respect to the rate of aging ( $\log \omega$ ), both wild ( $-0.75 \pm 0.34$  SD) vs. zoo ( $-0.95 \pm 0.24$  SD) ( $F_{1,17} = 14.30$ ,  $P = 0.0015$ ) and comparison ( $F_{17,17} = 6.0$ ,  $P = 0.0003$ ) were significant effects (overall model  $F_{18,17} = 6.5$ ,  $P = 0.0002$ ,  $R^2 = 0.87$ ); animals appear to age less rapidly in the zoo setting in this comparison. As found in previous analyses, the rate of aging is positively related to the initial mortality rate in both settings: wild,  $F_{1,16} = 7.14$ ,  $P = 0.017$ ,  $R^2 = 0.31$ , intercept  $-0.43$  ( $\pm 0.14$  SE), slope  $0.38$  ( $0.14$ ); zoo,  $F_{1,16} = 30.8$ ,  $P < 0.0001$ ,  $R^2 = 0.66$ , intercept  $-0.35$  ( $0.12$ ), slope  $0.59$  ( $0.11$ ).

Among the 18 paired comparisons,  $m_0$  in the wild can be predicted by  $m_0$  in the zoo by an essentially linear relationship:  $F_{1,16} = 9.4$ ,  $P = 0.0073$ ,  $R^2 = 0.37$ , intercept  $= -0.094$  ( $0.33$  SE, ns), slope  $0.94$  ( $0.31$  SE). In addition,  $\log \omega$  in the wild can be predicted by  $m_0$  in the zoo:  $F_{1,16} = 22.3$ ,  $P = 0.0002$ ,  $R^2 = 0.58$ , intercept  $= 0.29$  ( $0.23$ , ns), slope  $= 1.095$  ( $0.232$ ). Accordingly, I estimated values by  $\log m_0(\text{wild}) = -0.094 + 0.94 \log m_0(\text{zoo})$ .

APPENDIX 9. Results of nested analyses of variance and covariance

Each of the  $\log_{10}$ -transformed traits related to the rate of aging in mammals was analyzed in a nested analysis of variance, with levels Orders within class, Families within order, Genera with families, and Species within genus. Proportions of the variance at each of the levels are shown in the following table.

Table 1. Nested analysis of variance for aging and life history parameters of mammals.

| Level  | Adult mass |       | $m_0$ |        | $\omega$ |        | Gestation period |       | Age at maturity |       | Weaning period |       | Neonate mass |       | Brain mass |       | Postnatal growth rate |        |
|--------|------------|-------|-------|--------|----------|--------|------------------|-------|-----------------|-------|----------------|-------|--------------|-------|------------|-------|-----------------------|--------|
|        | df         | %     | df    | %      | df       | %      | df               | %     | df              | %     | df             | %     | df           | %     | df         | %     | df                    | %      |
| Order  | 14         | 0.547 | 14    | 0.279  | 14       | 0.339  | 14               | 0.623 | 14              | 0.398 | 14             | 0.439 | 14           | 0.676 | 11         | 0.613 | 11                    | 0.204  |
| Family | 38         | 0.350 | 38    | 0.218  | 38       | 0.396  | 37               | 0.303 | 37              | 0.420 | 36             | 0.402 | 37           | 0.266 | 30         | 0.318 | 27                    | 0.699  |
| Genus  | 66         | 0.089 | 66    | 0.145  | 66       | 0.030  | 66               | 0.061 | 64              | 0.092 | 62             | 0.089 | 65           | 0.048 | 41         | 0.043 | 29                    | 0.024  |
| Error  | 49         | 0.015 | 49    | 0.358  | 49       | 0.235  | 42               | 0.013 | 42              | 0.091 | 35             | 0.070 | 37           | 0.010 | 7          | 0.030 | 4                     | 0.072  |
| Mean   |            | 4.045 |       | -1.189 |          | -0.999 |                  | 2.130 |                 | 2.791 |                | 2.124 |              | 2.634 |            | 1.681 |                       | -2.170 |
| sd     |            | 1.248 |       | 0.102  |          | 0.266  |                  | 0.327 |                 | 0.375 |                | 0.398 |              | 1.308 |            | 0.900 |                       | 0.521  |
| n      | 168        |       | 168   |        | 168      |        | 160              |       | 158             |       | 148            |       | 154          |       | 90         |       | 72                    |        |

Note that most of the variance in the life history attributes is distributed at the levels of orders within the class Mammalia, and families within orders. The variables fitted by Weibull functions to the actuarial data are notable exceptions, with 50% of the variance in  $m_0$  and 27% of the variance in  $\omega$  distributed at the levels of species and genera. Most of this variation is measurement error associated with small sample size. This is emphasized by the lack of significant relationships between the rate of aging and either adult body mass or the initial mortality rate, particularly at the species level. The following table is adopted from Ricklefs (9), but updated with additional data to total 168 species, and with the variable  $m_0$  added.



Table 2. Nested analysis of covariance in  $\log_{10}$ -transformed adult body mass ( $M$ ), estimated initial mortality rate ( $m_0$ ), and rate of actuarial senescence ( $\omega$ ) in 168 species of mammal based on analysis of primarily captive populations. As in Table 1, the analysis partitions variance (proportion of the total) into components representing species within genera, genera within families, families within orders, and orders within mammals. Correlation coefficients ( $r$ ) and regression slopes ( $b$ ) are calculated from partitioned covariance components. Bolded values for correlations and regression slopes were significant at  $P < 0.0001$ .

| Level   | df  | Variance components |          |       | Correlation                 | Regression                        | Correlation                   | Regression                          |
|---------|-----|---------------------|----------|-------|-----------------------------|-----------------------------------|-------------------------------|-------------------------------------|
|         |     | $M$                 | $\omega$ | $m_0$ | ( $r$ )<br>$\omega$ vs. $M$ | slope ( $b$ )<br>$\omega$ vs. $M$ | ( $r$ )<br>$\omega$ vs. $m_0$ | slope ( $b$ )<br>$\omega$ vs. $m_0$ |
| Total   | 167 | 1.000               | 1.000    | 1.000 | <b>-0.450</b>               | <b>-0.094</b>                     | <b>0.540</b>                  | <b>0.411</b>                        |
| Order   | 14  | 0.547               | 0.339    | 0.279 | -0.123                      | -0.021                            | <b>0.859</b>                  | <b>0.722</b>                        |
| Family  | 35  | 0.350               | 0.396    | 0.218 | <b>-0.993</b>               | <b>-0.206</b>                     | <b>0.721</b>                  | <b>0.740</b>                        |
| Genus   | 66  | 0.088               | 0.030    | 0.145 | <b>-1.118</b>               | <b>-0.136</b>                     | -0.017                        | -0.006                              |
| Species | 42  | 0.015               | 0.235    | 0.358 | 0.158                       | 0.130                             | 0.224                         | 0.138                               |

Note: df = degrees of freedom.

The lack of a significant ordinal-level correlation between  $\log\omega$  and  $\log M$  might have been caused by the anomalous genus level correlation ( $< -1.00$ ). The correlation between ordinal mean values of  $\log\omega$  and  $\log M$  is significant ( $F_{1,13} = 10.3$ ,  $P = 0.007$ ,  $R^2 = 0.44$ ),  $\log\omega = -0.365 (\pm 0.172 \text{ SE}) - 0.137 (\pm 0.043 \text{ SE}) \log M$ .

APPENDIX 10. Phylogenetic independent contrasts.

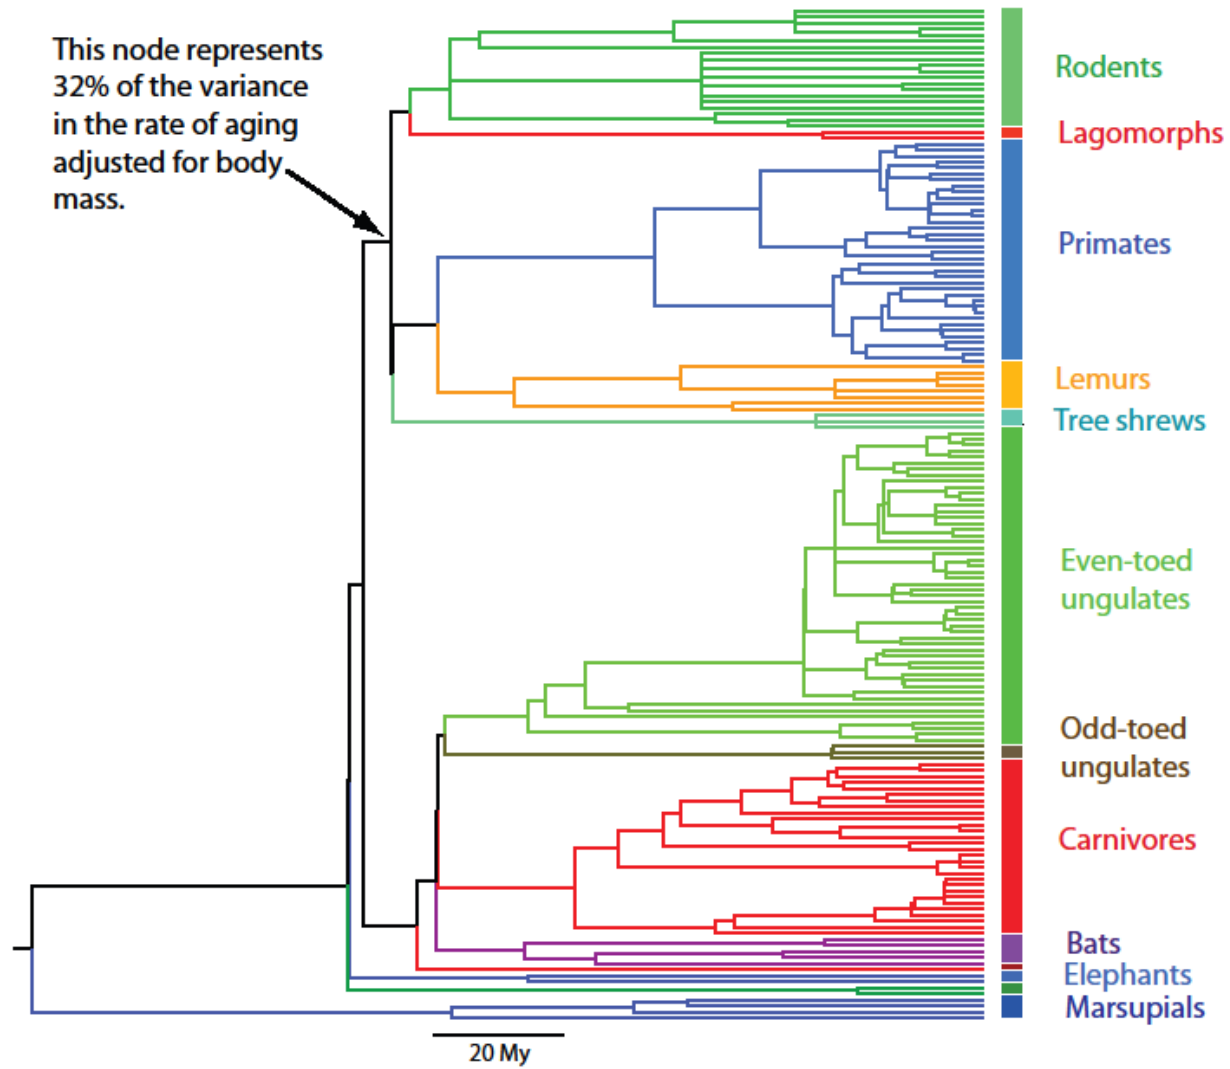

Because species share much of their phylogenetic histories, data values for individual species are not fully independent. Several methods have been developed to circumvent this problem (Paradis), the most widely used being the method of independent contrasts (Felsenstein, Harvey, Garland). Other indices have been developed to quantify the degree of phylogenetic (evolutionary) conservatism in a particular parameter, which reflects the shared evolutionary histories of species and also appears as the distribution of a large proportion of the variance in the parameter among higher level taxa (see Appendix 6).

Here, I present phylogenetically informed analyses on aging and life-history data for mammals based on the phylogeny constructed as a supertree by Bininda-Emonds et al. (10). Olaf Bininda-Emonds kindly provided a Newick file solely of the species in this analysis subsampled from the complete tree. Independent contrasts and further analyses of contrasts were calculated using the program PHYLOCOM (11).

In the program PHYLOCOM, the significance of the influence of phylogeny (evolutionary history) on variance in trait parameters is estimated by the variance in contrasts relative to the distribution of variances for many randomizations of the values on the tree. For  $\log_{10}$ -transformed values of body mass ( $M$ ), initial mortality ( $m_0$ ), and rate of aging ( $\omega$ ), as well as the residuals of  $m_0$  and  $\omega$  on  $M$ , the observed variance was less than 999 of 1000 randomized values, showing highly significant phylogenetic conservatism.

Residuals about the regression of  $\log(\omega)$  on  $\log(M)$  were calculated from the linear regression  $\log(\omega) = -0.593 (\pm 0.062 \text{ SE}) - 0.100 (\pm 0.015 \text{ SE}) \log(M)$  ( $F_{1,166} = 47.3$ ,  $P < 0.0001$ ,  $R^2 = 0.222$ ). Residuals about the regression of  $\log(m_0)$  on  $\log(M)$  were calculated from  $\log(m_0) = -0.645 (\pm 0.082 \text{ SE}) - 0.135 (\pm 0.019 \text{ SE}) \log(M)$  ( $F_{1,166} = 48.4$ ,  $P < 0.0001$ ,  $R^2 = 0.226$ ).

#### *Points of rapid transition in life-history parameters in the mammal phylogenetic tree*

PHYLOCOM calculates the proportional contribution of changes occurring at particular nodes to the total phenotypic variance, using an approach described by Moles et al. (12).

For the logarithm of adult mass, important nodes (out of a total of 167, with their percentage contribution to the total variance) are:

Bats (-) versus (ungulates, carnivore) (+) (28.6 %)

(Tree shrews, primates, lagomorphs, rodents)(-) versus (Bats, carnivores, ungulates)(+) (17.1%)

Elephants (+) versus other placentals (-) (8.5%)

Carnivores (-) versus ungulates (+) (6.6%)

For logarithm of the rate of aging ( $\omega$ ), the important nodes are:

(Primates, tree shrews) (+) versus (Rodents, lagomorphs)(-) (22.8%)

Marsupials (-) versus placentals (+) (9.8%)

(Hippopotamus, dolphin) (+) versus (rest of artiodactyls except pigs and camels)(-) (9.4%)

Muridae (-) versus (remainder of rodents, excl. Sciuridae)(+) (6.0%)

For the logarithm of the initial mortality rate ( $m_0$ ) adjusted to the wild (see APPENDIX 5) the important nodes were:

(Hippopotamus, dolphin) (-) versus (rest of artiodactyls except pigs and camels)(+) (43.8%)

Elephants (-) versus other placentals (+) (14.5%)

(Tree shrews, primates, lagomorphs, rodents)(-) versus (bats, carnivores, ungulates)(+) (12.4%)

Bats (-) versus carnivores and ungulates (+) (9.4%)

(Primates, tree shrews) (-) versus (rodents, lagomorphs)(+) (8.4%)

For the residuals from the  $\log(\omega)$  vs.  $\log(M)$  regression, the important nodes were:

(Primates, tree shrews) (-) versus (rodents, lagomorphs)(+) (31.7%)

Marsupials (+) versus placentals (-) (9.7%)

(Hippopotamus, dolphin) (-) versus (rest of artiodactyls except pigs and camels)(+) (7.4%)

Muridae (+) versus (remainder of rodents, excl. Sciuridae)(-) (5.1%)

Note: The residuals for *Rattus rattus* (-0.484) and *Mus musculus* (-0.830) were much too low and thus were adjusted to the mean of the remainder of the rodents (0.248).

For the residuals of  $\log(m_0)$  versus  $\log(M)$  regression, the important nodes were:

(Hippopotamus, dolphin) (-) versus (rest of artiodactyls except pigs and camels)(+) (47.1%)

(Primates, tree shrews) (-) versus (rodents, lagomorphs)(+) (15.9%)

Elephants (-) versus other placentals (+) (9.6%)

These transitions in the mammal phylogeny emphasize the striking reduction in both initial (extrinsic) mortality ( $m_0$ ) and rate of aging ( $\omega$ ) in the few semi-aquatic and aquatic species (hippopotamus and dolphin) and in the primates and tree shrews.

#### *The relationships between $\log(\omega)$ , $\log(m_0)$ , and $\log(M)$ in a phylogenetic context*

The simple correlation between  $\log(\omega)$  and  $\log(M)$  is  $r = -0.450$  and the slope of the regression is  $-0.094$  (Table 2, above). In a phylogenetic context, using generalized estimating equations (Paradis, page 147) with link: identity, and a Gaussian variance to mean relation, the slope of the relationship becomes  $-0.136 (\pm 0.006 \text{ SE})$ ,  $t = -23.8$ ,  $P < 0.0001$ , phylogenetic  $df = 32.7$  (168 observations).

The relationship based on independent contrasts in PHYLOCOM (A-values, calculated on the basis of node trait estimates and not tip values, number of contrasts = 149 rather than 167 because there are several polytomies in the tree) gives a correlation ( $r$ ) of -0.245, which is less than the correlation among the tip values, as is usually the case (13). The regression of the rectified contrasts for  $\log(\omega)$  as a function of the positivized contrasts for  $\log(M)$  was  $\log(\omega) = 0.0053 (\pm 0.0043 \text{ SE}) - 0.123 (\pm 0.040 \text{ SE}) \log(M)$  ( $F_{1,147} = 9.3$ ,  $P = 0.0027$ ,  $R^2_{\text{adj}} = 0.053$ ), which is similar to the generalized estimating equation and not very different from the regression based on tip (species) values.

When this regression is based on contrasts for nodes that are >40 Mya, the results are much cleaner, suggesting that there is a lot of noise in the tips of the phylogeny. The regression for this relationship is  $\log(\omega) = 0.0016 (\pm 0.0052 \text{ SE}) - 0.1142 (\pm 0.032 \text{ SE}) \log(M)$  ( $F_{1,34} = 20.0$ ,  $P < 0.0001$ ,  $R^2_{\text{adj}} = 0.352$ )

The evolutionary change in rate of aging relative to initial mortality, using contrasts for the residuals of  $\log(\omega)$  and  $\log(m_0)$  relative to  $\log(M)$ , was not significant ( $n = 149$ ,  $P = 0.17$ ).

## References

1. Saether BE & Bakke O (2000) Avian life history variation and contribution of demographic traits to the population growth rate. *Ecology* **81**, 642-653.
2. Ricklefs RE (2000) Density dependence, evolutionary optimization, and the diversification of avian life histories. *Condor* **102**, 9-22.
3. Millar JS & Zammuto RM (1983) Life histories of mammals: an analysis of life tables. *Ecology* **64**, 631-635.
4. Ricklefs RE (1998) Evolutionary theories of aging: confirmation of a fundamental prediction, with implications for the genetic basis and evolution of life span. *Am. Nat.* **152**, 24-44.
5. Lynch HJ & Fagan WF (2009) Survivorship curves and their impact on the estimation of maximum population growth rates. *Ecology* **90**, 1116-1124.
6. Loison A, Festa-Bianchet M, Gaillard JM, Jorgenson JT, & Jullien JM (1999) Age-specific survival in five populations of ungulates: Evidence of senescence. *Ecology* **80**, 2539-2554.
7. de Magalhães JP & Costa J (2009) A database of vertebrate longevity records and their relation to other life-history traits. *Journal of Evolutionary Biology* **22**, 1770-1774.
8. Ricklefs RE (2007) Tyrannosaur ageing. *Biology Letters* **3**, 214-217.
9. Ricklefs RE (2010) Insights from comparative analyses of aging in birds and mammals. *Aging Cell*.
10. Bininda-Emonds ORP, Cardillo M, Jones KE, MacPhee RDE, Beck RMD, Grenyer R, Price SA, Vos RA, Gittleman JL, & Purvis A (2007) The delayed rise of present-day mammals. *Nature* **446**, 507-512.
11. Webb CO, Ackerly DD, & Kembel SW (2008) Phylocom: software for the analysis of phylogenetic community structure and trait evolution. *Bioinformatics* **24**, 2098-2100.
12. Moles AT, Ackerly DD, Webb CO, Tweddle JC, Dickie JB, Pitman AJ, & Westoby M (2005) Factors that shape seed size evolution. *Proceedings of the National Academy of Sciences of the United States of America* **102**, 10540-10544.
13. Ricklefs RE & Starck JM (1996) Applications of phylogenetically independent contrasts: a mixed progress report. *Oikos* **77**, 167-172.
